# Supplementary material for: An aniline-bridged bis (pyrazolyl)alkane ligand for dizinc-catalysed ring-opening polymerization
Source: Royal Society of Chemistry journal article supplement (doi:10.1039/d4dt02837f), 2024-01-01
Supplement: d4dt02837f1.pdf [file d4dt02837f1.pdf]

## **An Aniline-Bridged *Bis*(pyrazolyl)alkane Ligand for Dizinc-Catalysed Ring-Opening Polymerization**

**Pratyush K. Naik, Zipeng Gu, Robert J. Comito\***

*Department of Chemistry, The University of Houston, 4800 Calhoun Road, Houston, Texas  
77004*

### Supporting Information

#### Contents

|                                                                                               |     |
|-----------------------------------------------------------------------------------------------|-----|
| S1. General information                                                                       | S2  |
| S2. Preparation of ligand <b>1</b> (AD <sup>Me</sup> H <sub>2</sub> ) and other precursors    | S4  |
| S3. Spectral data for ligand <b>1</b> (AD <sup>Me</sup> H <sub>2</sub> ) and other precursors | S10 |
| S4. Synthesis of dizinc complexes                                                             | S19 |
| S5. Spectral data for metal complexes                                                         | S28 |
| S6. X-ray diffraction analysis of <b>6</b>                                                    | S44 |
| S7. Polymerization                                                                            | S59 |
| S8. Spectral data for polymers                                                                | S62 |
| S9. Computational models                                                                      | S70 |

## S1. General Information.

Lactide was obtained from Millipore Sigma. Lactide was recrystallized from toluene then sublimated twice before use. Other commercial reagents were purified prior to use following the guidelines of Perrin and Armarego.<sup>1</sup> All solvents were purified according to the method of Grubbs.<sup>2</sup> Yields refer to pure compounds, unless otherwise indicated. All reactions were performed in an atmosphere of dry, oxygen-free dinitrogen using standard Schlenk techniques or a nitrogen glovebox.

<sup>1</sup>H-NMR spectra were recorded on a JEOL 400 MHz NMR spectrometer and are internally referenced relative to residual protio solvent signals at  $\delta = 7.26$  ppm for CDCl<sub>3</sub> and at  $\delta = 7.16$  ppm for C<sub>6</sub>D<sub>6</sub>. Data for <sup>1</sup>H-NMR are reported as follows: chemical shift ( $\delta$  ppm), multiplicity (s = singlet, d = doublet, t = triplet, q = quartet, m = multiplet, etc.), integration, and coupling constant (Hz).

<sup>13</sup>C-NMR spectra were recorded on a JEOL 400 MHz NMR spectrometer (at 101 MHz) and are referenced relative to  $\delta = 77.00$  ppm for CDCl<sub>3</sub> and  $\delta = 128$  ppm for C<sub>6</sub>D<sub>6</sub>. Data for <sup>13</sup>C-NMR are reported in terms of chemical shift. Homonuclear-decoupled <sup>1</sup>H-NMR experiments were performed on a JEOL 400 MHz NMR spectrometer. The irradiation position was set to the lactyl methyl protons ([C(O)CH(CH<sub>3</sub>)O]<sub>n</sub>,  $\delta = 1.57$  ppm). The irradiation attenuator was optimized to achieve the best decoupling.

IR spectra were recorded on a ThermoFisher Nicolet iS10 spectrometer with Smart iTR diamond plate and are reported in terms of wavenumber of absorption (cm<sup>-1</sup>). Differential scanning calorimetry (DSC) was conducted on a TA-DSC 2500 with a crimped aluminum sample pan and reference pan. For the analysis, the instrument was operated between -80 °C and 100 °C at a rate of 10 °C /minute for heating and cooling cycle under nitrogen atmosphere. All thermal data

---

<sup>1</sup> Perrin, D. D.; Armarego, W. L. F. *Purification of Laboratory Chemicals*. 3<sup>rd</sup> ed., Pergamon Press, Oxford, 1988.

<sup>2</sup> Pangborn, A. B.; Giardello, M. A.; Grubbs, R. H.; Rosen, R. K.; Timmers, F. J. *Organometallic*. **1996**, *15*, 1518.

reported were taken from the second heat curve. Gel permeation chromatography (GPC) analyses were performed using a Tosoh high performance GPC system HLC-8320 equipped with an auto injector, a dual differential refractive index (RI) detector, and three TSKgel HHR series columns connected in series (7.8×300 mm TSKgel G5000HHR, TSKgel G4000HHR, TSKgel G3000HHR). GPC analysis were carried out in HPLC grade tetrahydrofuran with a flow rate of 1.0 mL/min at 40 °C. Relative molecular weights ( $M_n$  and  $M_w$ ) and molecular weight distributions ( $\mathcal{D}$ ) were calculated using conventional column calibration with polystyrene (PS) standards. High Resolution Mass (HRMS) spectra were obtained from University of Texas at Austin Mass Spectrometry Lab. Elemental analysis was performed by Robertson MicroLit Laboratories. MALDI-TOF analysis was performed at the University of Houston MALDI TOF Core Facility using the Bruker Daltonics UltrafleXtreme instrument. The poly(*rac*-lactic acid) sample was dissolved in THF (3 mg/mL) with 2,5-Dihydroxybenzoic acid (DHB) as the matrix (2 mg/mL in THF) and sodium trifluoroacetate (NaTFA) (3mg/ml in THF) as the sodium ion source. These solutions were combined in the ratio of 10:1:1 (DHB:PLA:NaTFA) by volume and then spotted into the sample plate for analysis.

## S2. Preparation of Ligand 1 (AD<sup>Me</sup>H<sub>2</sub>) and Other Precursors

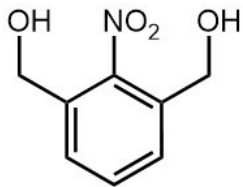

**2-nitro-1,3-benzenedimethanol.** Prepared according to the reported method.<sup>3</sup> An oven-dried Schlenk flask was charged with 2-nitroisophthalic acid (1.22 g, 5.80 mmol, 1.00 equiv.), anhydrous THF under nitrogen. Borane tetrahydrofuran (29 mL, 1.0 M solution in THF, 29 mmol, 5.0 equiv.) was added to the reaction at 0 °C while stirring. The stirring continued for 48 hours after and then the solvent was removed under vacuum. The residue was then partitioned between ethyl acetate (30 mL) and water (15 mL). The organic layer was rinsed with another portion of water (15 mL), then dried over sodium sulfate, and decanted. The product was obtained as a white solid under vacuum (811 mg, 4.42 mmol, 76% yield). Its <sup>1</sup>H-NMR and <sup>13</sup>C-NMR were identical to those in the reported procedure. <sup>1</sup>H-NMR (400 MHz, DMSO-d<sub>6</sub>): δ 7.54 (m, 3H), 5.45 (t, 2H), 4.49 (d, 4H). <sup>13</sup>C-NMR (101 MHz, DMSO-d<sub>6</sub>) δ 147.9, 134.9, 131.3, 128.1, 59.8. IR (Diamond ATR) 3200, 2800, 1507, 1359, 1348, 1321, 1283, 1059, 1043, 788, 754, 705, 686, 663, 615 cm<sup>-1</sup>. HRMS (based on formula C<sub>8</sub>H<sub>9</sub>NO<sub>4</sub>) m/z: expected: 183.0532 amu ([M]<sup>+</sup>), found: 183.0526 amu, difference -3.3 ppm.

<sup>3</sup> Fu, Y.; Xing, Z.; Zhu, C.; Yang, H.; He, W.; Zhu, C.; Cheng, Y. A Novel Calixsalen Macrocycle: Metal Sensing Behavior for Zn<sup>2+</sup> and Intracellular Imaging Application. *Tetrahedron Lett.* **2012**, 53, 804-807.

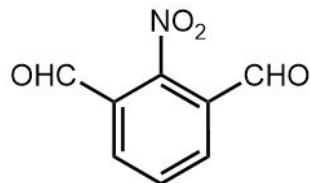

**2-nitro-1,3-benzenedialdehyde (3).** **3** was prepared according to the reported method.<sup>4</sup> A solution of 2,6-bis(hydroxymethyl)nitrobenzene (1.03 g, 5.60 mmol, 1.00 equiv.) and pyridinium chlorochromate (PCC, 6.03 g, 28.0 mmol, 5.00 equiv.) and CH<sub>2</sub>Cl<sub>2</sub> (150 mL) was stirred at room temperature for 12 hours. The reaction mixture was purified by flash chromatography on silica with 1:1 CH<sub>2</sub>Cl<sub>2</sub> to hexane (R<sub>f</sub> = 0.5). Vacuum drying gave the product as a pale orange solid (687 mg, 3.84 mmol, 68% yield). Its <sup>1</sup>H-NMR and <sup>13</sup>C-NMR matched those published in the reported method. <sup>1</sup>H-NMR (400 MHz, CDCl<sub>3</sub>): δ 10.07 (s, 2H), 8.25 (d, 2H), 7.89 (t, 1H). <sup>13</sup>C-NMR (101 MHz, CDCl<sub>3</sub>) δ 185.8, 150.8, 135.3, 132.1, 128.0. IR (Diamond ATR) 1700, 1592, 1546, 1513, 1479, 1446, 1394, 1350, 1309, 1231, 1059, 1012, 998, 801, 775, 757, 720, 706, 649, 625 cm<sup>-1</sup>. HRMS (based on formula C<sub>8</sub>H<sub>5</sub>NO<sub>4</sub>) m/z: expected: 179.0219 amu ([M]<sup>+</sup>), found: 179.0218 amu, difference -0.6 ppm.

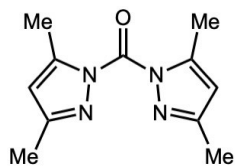

**Bis(3,5-dimethylpyrazol-1-yl)methanone (4).** Methanone **4** was prepared according to the reported method.<sup>4</sup> An oven-dried Schlenk flask was charged with 3,5-dimethylpyrazole (19.4 g, 202 mmol, 6.0 equivalents), triethylamine (30.5 mL, 219 mmol, 6.5 equivalents), and THF (300 mL). The solution was allowed to stir for 30 min and then cooled to 0 °C. Triphosgene (10 g, 34 mmol, 1 equivalent) as a solution in anhydrous THF was added dropwise over 10 min. The resulting pale-yellow and inhomogeneous suspension was allowed to warm to room temperature and stir for 4 hours. The reaction was then filtered, the solids were washed with THF, and the combined filtrate and washings were concentrated in vacuo to yield a pale yellow solid. The crude

<sup>4</sup> Fu, Y.; Xing, Z.; Zhu, C.; Yang, H.; He, W.; Zhu, C.; Cheng, Y. A Novel Calixsalen Macrocycle: Metal Sensing Behavior for Zn<sup>2+</sup> and Intracellular Imaging Application. *Tetrahedron Lett.* **2012**, *53*, 804-807.

product was recrystallized from dichloromethane/hexanes by first dissolving the crude product in boiling dichloromethane and then slowly adding boiling hexanes until the solution turns turbid, followed by a minimal amount of boiling dichloromethane until the solution just turns clear. After storage at  $-20\text{ }^{\circ}\text{C}$  overnight, the product was isolated as a white solid (19.12 g, 87.60 mmol, 86% yield).  $^1\text{H-NMR}$  (400 MHz,  $\text{CDCl}_3$ ):  $\delta$  6.03 (s, 2H), 2.46 (s, 6H), 2.26 (s, 6H).  $^{13}\text{C-NMR}$  (101 MHz,  $\text{CDCl}_3$ ):  $\delta$  153.1, 148.0, 145.5, 111.5, 14.1, 13.2. Our  $^1\text{H-NMR}$  and  $^{13}\text{C-NMR}$  are consistent with those reported for this compound.<sup>4</sup>

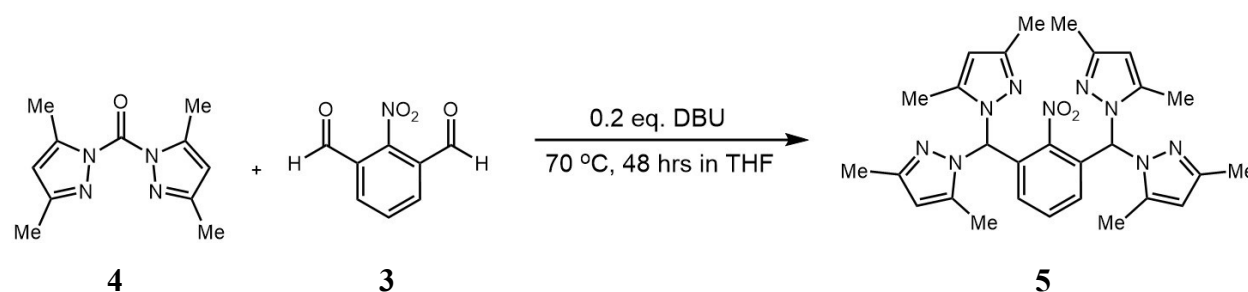

**(2,6-bis(3,5-dimethylpyrazol-1-ylmethane)nitrophenyl) 5.** In a pressure tube with cap and stir bar, a solution of **3** (659 mg, 3.68 mmol, 1 equivalent), **4** (1.61 g, 7.36 mmol, 2 equivalents), 1,8-diazabicyclo[5.4.0]undec-7-ene (DBU) (110  $\mu\text{L}$ , 0.74 mmol, 0.2 equivalents), and tetrahydrofuran was heated to  $70\text{ }^{\circ}\text{C}$  for 48 hours. Volatiles were removed under vacuum, and then, the remaining residue was purified by flash chromatography on silica by increasing eluent polarity starting from 1:9 ethyl acetate/hexane to 1:1 ethyl acetate/hexane ( $R_f = 0.28$ ). The desired product coelutes with 3,5-dimethylpyrazole. This impurity was removed by sublimation under vacuum at  $70\text{ }^{\circ}\text{C}$ , giving the pure product as pale yellow solids (913 mg, 1.73 mmol, 47% yield).  $^1\text{H-NMR}$  (400 MHz,  $\text{CDCl}_3$ ):  $\delta$  7.85 (s, 2H), 7.38 (t, 1H), 6.58 (d, 2H), 5.84 (s, 4H), 2.15 (s, 12H), 2.11 (s, 12H).  $^{13}\text{C-NMR}$  (101 MHz,  $\text{CDCl}_3$ ):  $\delta$  148.9, 146.8, 140.8, 131.5, 131.2, 128.7, 107.0, 69.8, 13.8, 11.1. IR (Diamond ATR) 1559, 1536, 1451, 1413, 1379, 1358, 1331, 1304, 1282, 1267, 1254, 1027, 967, 814, 795, 784, 776, 758, 694, 625  $\text{cm}^{-1}$ . HRMS (based on formula  $\text{C}_{28}\text{H}_{33}\text{N}_9\text{O}_2$ )  $m/z$ : expected: 550.2649 amu ( $[\text{M}+\text{Na}]^+$ ), found: 550.2654 amu, difference:  $-0.77$  ppm.

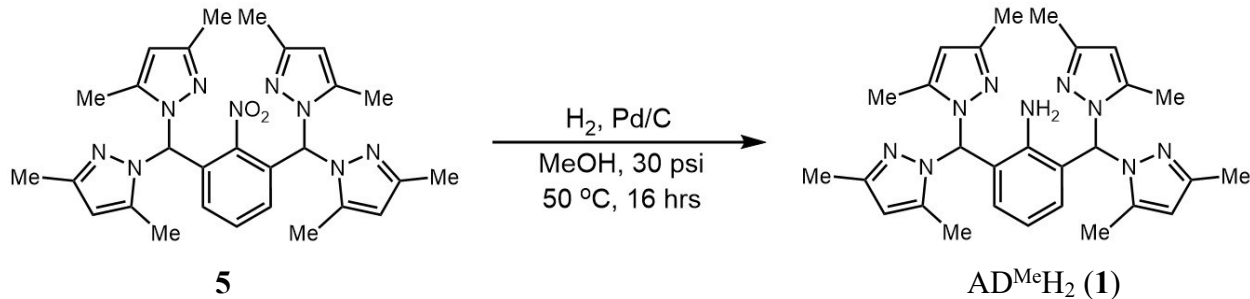

**(2,6-bis(3,5-dimethylpyrazol-1-ylmethane)aniline) (AD<sup>Me</sup>H<sub>2</sub>, 1).** In a dried Fisher-Porter tube under nitrogen, 10.0% palladium on carbon (72.8 mg, 0.68 mmol, 0.82 equivalents) was added to **5** (440 mg, 0.83 mmol, 1 equivalent) in 1 mL of methanol. The tube was pressured with hydrogen gas at 30 psi while the stirring continued at 50 °C for 16 hours. After the hydrogen was vented, the reaction was diluted with CH<sub>2</sub>Cl<sub>2</sub> (15 mL), filtered, and concentrated under vacuum. The crude residue was transferred into a sublimator where 3,5-dimethylpyrazole was removed under vacuum at 70 °C. The product was recrystallized by dissolving in CH<sub>2</sub>Cl<sub>2</sub> and hexane at room temperature and then storing at -40 °C overnight, giving AD<sup>Me</sup>H<sub>2</sub> (**1**) as pale white solid (220 mg, 0.44 mmol, 53% yield). <sup>1</sup>H-NMR (500 MHz, CDCl<sub>3</sub>) δ 7.38 (s, 2H), 6.61 (t, 1H), 6.38 (d, 2H), 5.85 (s, 4H), 2.19 (s, 12H), 2.11 (s, 12H). <sup>13</sup>C-NMR (125 MHz, CDCl<sub>3</sub>) δ 148.9, 142.4, 141.2, 128.1, 122.0, 117.9, 107.1, 72.3, 13.9, 11.7. IR (Diamond ATR) 3464, 2922, 1641, 1559, 1449, 1416, 1375, 1343, 1302, 1254, 1205, 1166, 1106, 1029, 974, 942, 870, 853, 824, 772, 756, 729, 707, 673, 616, 549, 480, 439 cm<sup>-1</sup>. HRMS (based on formula C<sub>28</sub>H<sub>35</sub>N<sub>9</sub>) m/z: expected: 520.2908 amu ([M+Na]<sup>+</sup>), found: 520.2908 amu, difference: 0 ppm.

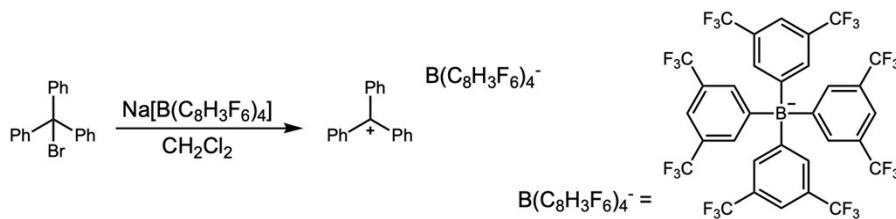

**Trityl tetrakis(3,5-bis(trifluoromethyl)phenyl)borate** was prepared according to the reported method.<sup>5</sup> In a glovebox, trityl bromide (1.82 g, 5.64 mmol, 1 equivalent), and sodium tetrakis(3,5-bis(trifluoromethyl)phenyl)borate (5.26 g, 5.64 mmol, 1 equivalent), were dissolved in

<sup>5</sup> Scott, Valerie J.; Remle Çelenligil-Çetin; Oleg V. Ozerov. Room-temperature catalytic hydrodefluorination of C (sp<sup>3</sup>)-F bonds. *J. Am. Chem. Soc.* **2005**, *127*, 2852–2853

dichloromethane (14 mL, each), and then mixed together. After stirring for 4 hours, the reaction mixture was filtered through a glass Buchner funnel. The yellow filtrate was then transferred to a round bottom flask and the solvent was removed under vacuum, providing the product as a flaky yellow solid (5.86 g, 5.30 mmol, 94% yield.).  $^1\text{H-NMR}$  (400 MHz,  $\text{CD}_2\text{Cl}_2$ )  $\delta$  8.12 (t,  $J = 7.5$  Hz, 3H), 7.74 (t,  $J = 7.7$  Hz, 6H), 7.67 (s, 8H), 7.56 (d,  $J = 8.0$  Hz, 6H), 7.47 (s, 4H).  $^{13}\text{C-NMR}$  (101 MHz,  $\text{CD}_2\text{Cl}_2$ )  $\delta$  210.8, 161.8 (dd,  $J = 50.1$  Hz), 143.8, 142.4, 139.8, 134.8, 130.8, 129.0, 125.9 (q), 124 (q), 117.6.  $^{19}\text{F-NMR}$  (376 MHz,  $\text{CD}_2\text{Cl}_2$ )  $\delta$  -62.30. Our  $^1\text{H-NMR}$ ,  $^{19}\text{F-NMR}$ , and  $^{13}\text{C-NMR}$  are consistent with those reported for this compound.<sup>6</sup>

---

<sup>6</sup> Wu, F.; Deraedt, C.; Cornaton, Y.; Ruhlmann, L.; Karmazin, L.; Bailly, C.; Kyritsakas, N.; Le Breton, N.; Choua, S.; Djukic, J.P. Fate of Cobaltacycles in  $\text{Cp}^*$  Co-Mediated C–H Bond Functionalization Catalysis: Cobaltacycles May Collapse upon Oxidation via Co (IV) Species. *Organometallics* **2021**, *40*, 2624–2642.



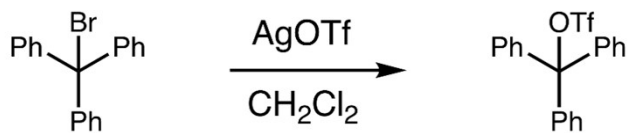

**Trityl triflate** was prepared according to the reported method.<sup>7</sup> Its <sup>1</sup>H-NMR and <sup>13</sup>C-NMR were identical to the ones presented there. <sup>1</sup>H-NMR (500 MHz, CD<sub>2</sub>Cl<sub>2</sub>) δ 8.27 (t, J = 6.8 Hz, 3H), 7.89 (t, J = 7.0 Hz, 6H), 7.68 (d, J = 7.0 Hz, 6H). <sup>13</sup>C-NMR (126 MHz, CD<sub>2</sub>Cl<sub>2</sub>) δ 210.9, 143.5, 142.9, 140.0, 130.7. <sup>19</sup>F-NMR (470 MHz, CD<sub>2</sub>Cl<sub>2</sub>) δ -78.78. Our <sup>1</sup>H-NMR, <sup>19</sup>F-NMR, and <sup>13</sup>C-NMR are consistent with those reported for this compound.<sup>7</sup>

<sup>7</sup> Hinz, A.; Labbow, R.; Reiß, F.; Schulz, A.; Sievert, K.; & Villinger, A. Synthesis and Structure of Tritylium Salts. *Struct. Chem.* **2005**, *26*, 1641-1650.

**S3. Spectral Data for Ligands 1 (AD<sup>Me</sup>H<sub>2</sub>) and Other Precursors**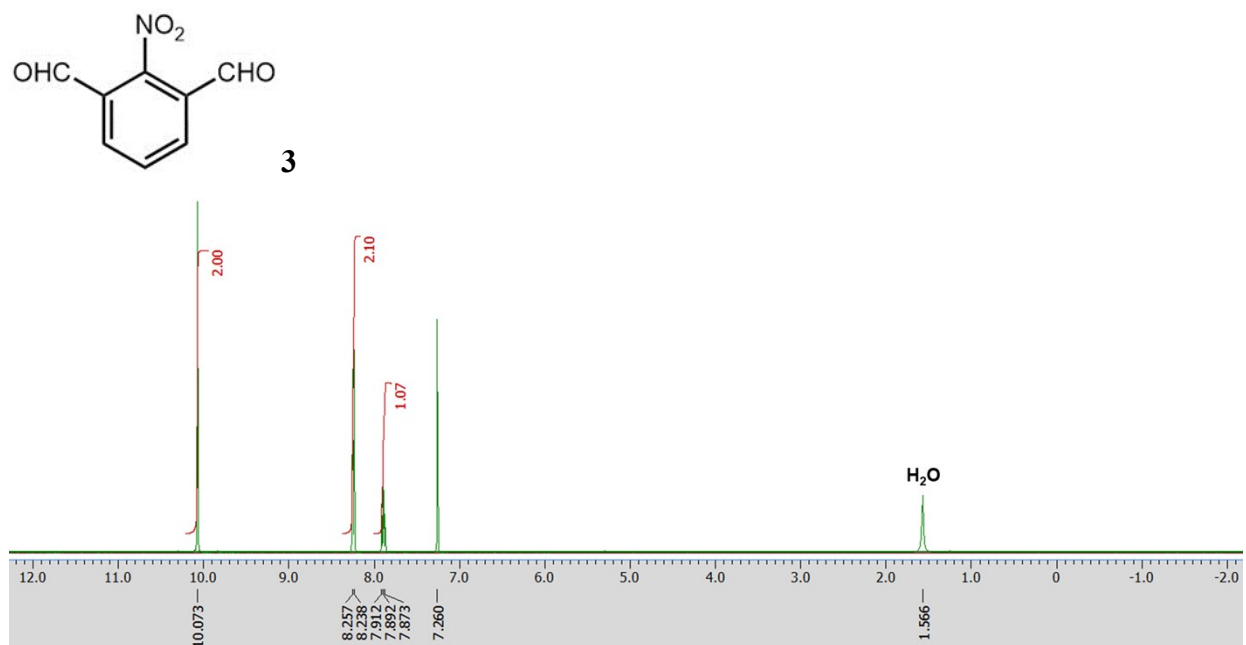**Figure S1.** <sup>1</sup>H-NMR of **3**, CDCl<sub>3</sub>, 400 MHz.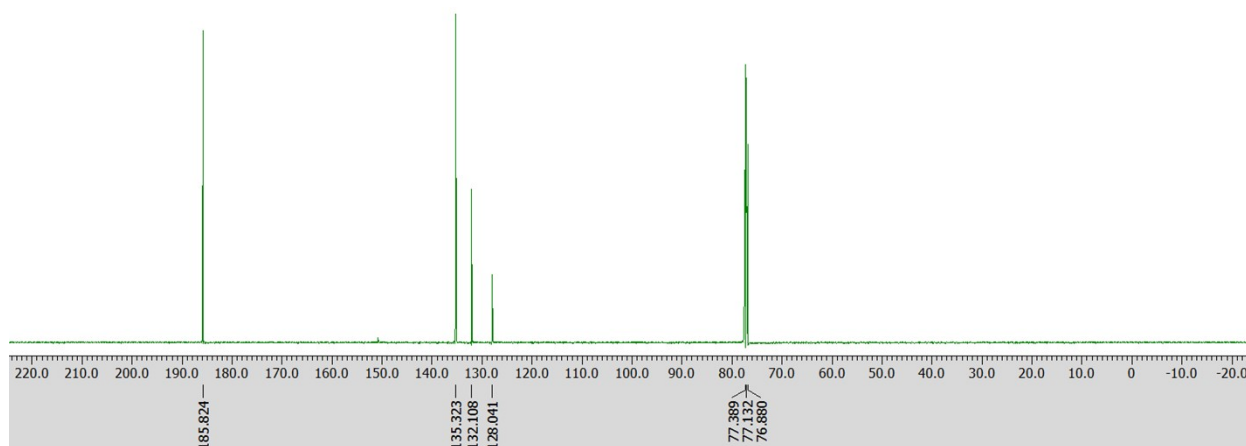**Figure S2.** <sup>13</sup>C-NMR of **3**, CDCl<sub>3</sub>, 101 MHz.

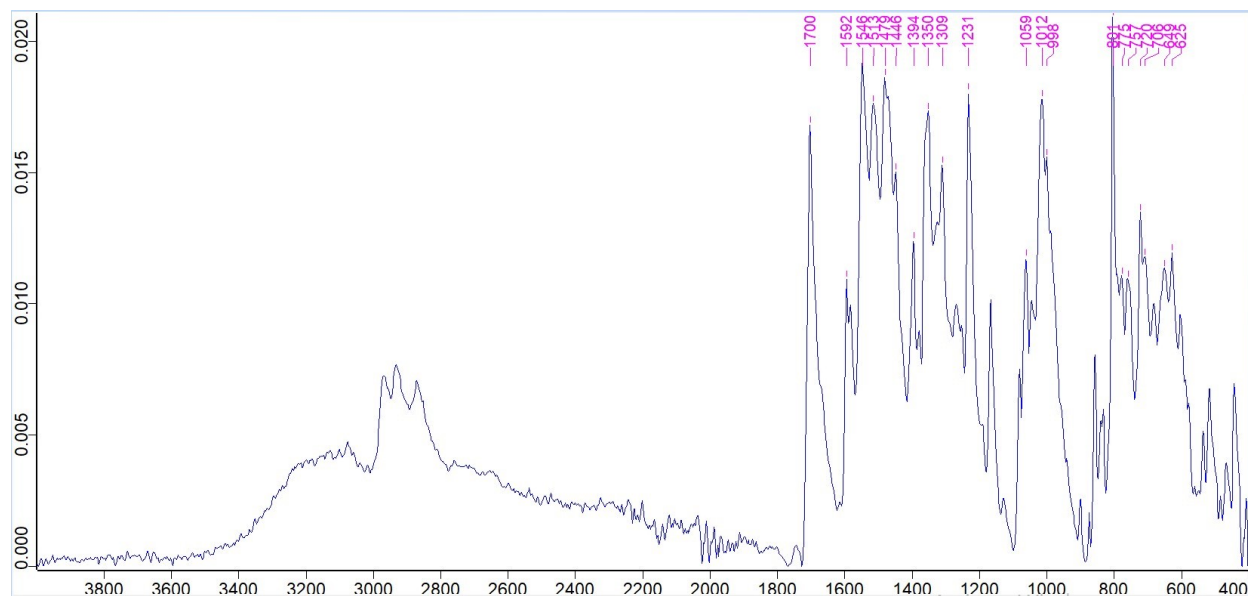

**Figure S3.** Infrared spectrum of **3**, diamond ATR.

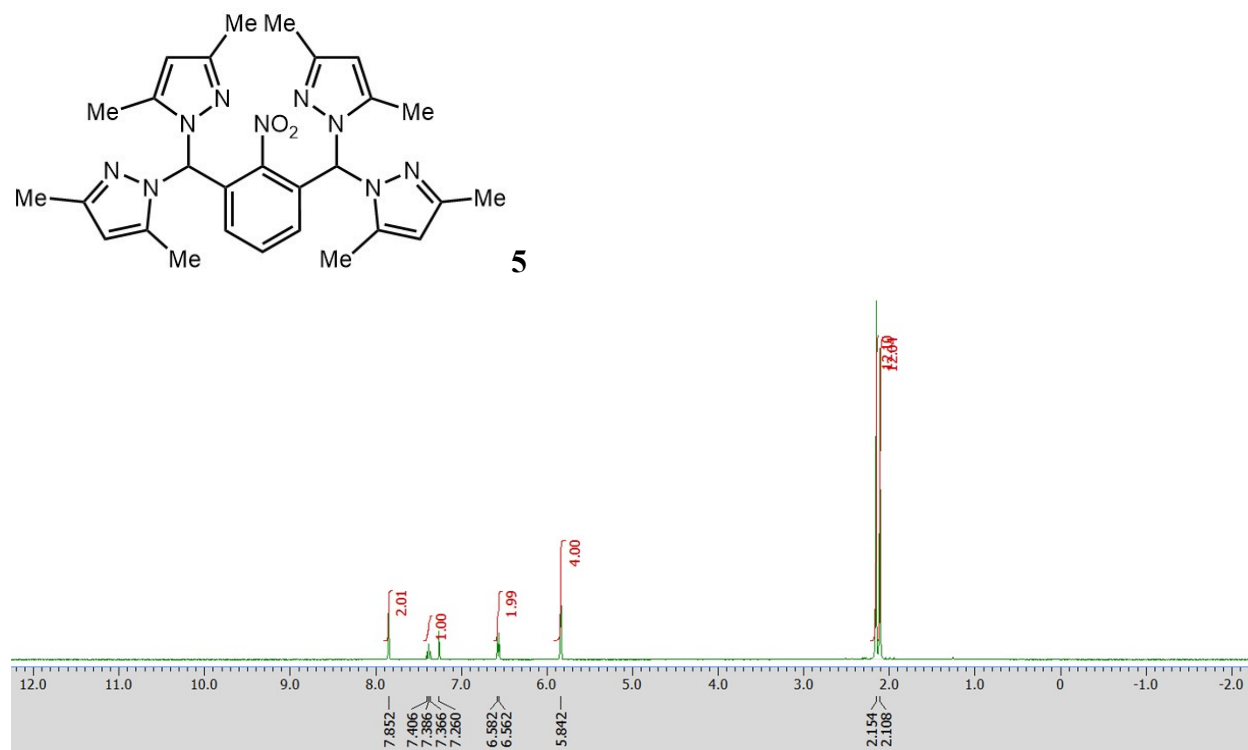

**Figure S4.** <sup>1</sup>H-NMR of **5**, CDCl<sub>3</sub>, 400 MHz.

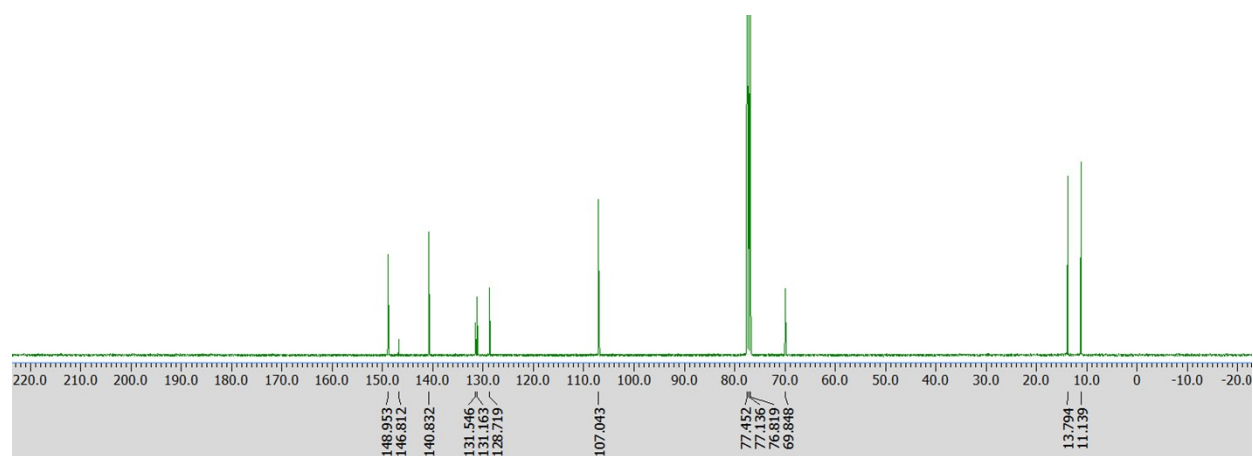

**Figure S5.**  $^{13}\text{C}$ -NMR of **5**,  $\text{CDCl}_3$ , 101 MHz.

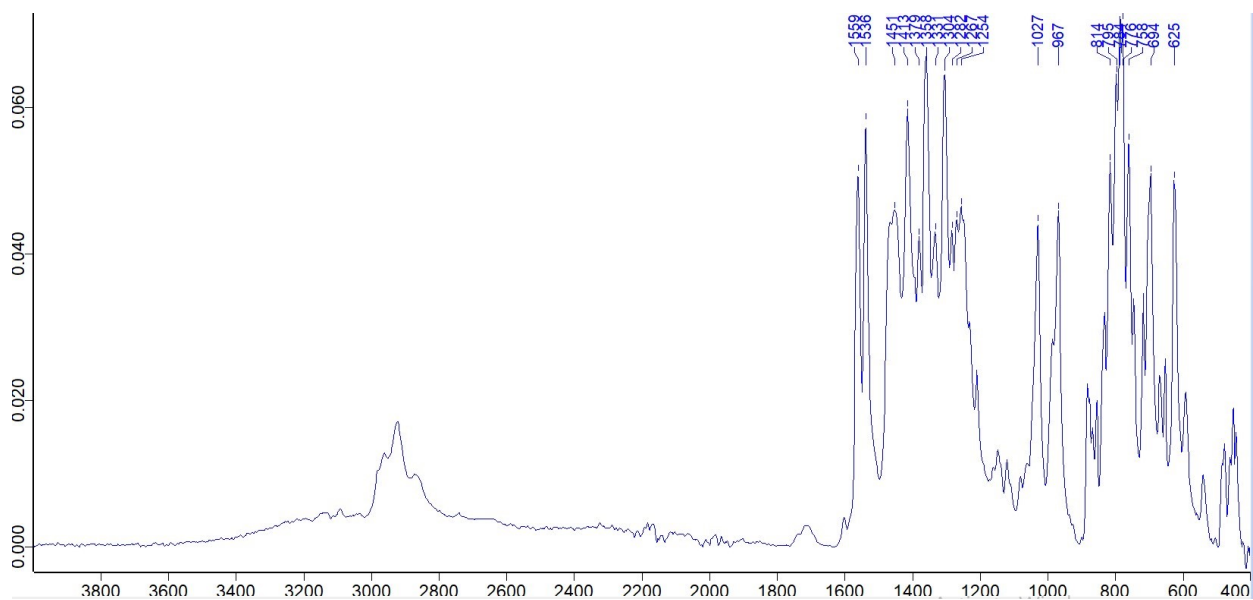

**Figure S6.** Infrared spectrum of **5**, diamond ATR.

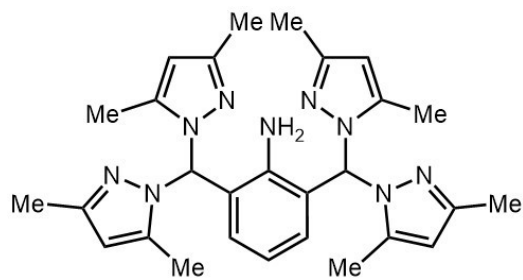**AD<sup>Me</sup>H<sub>2</sub> (1)**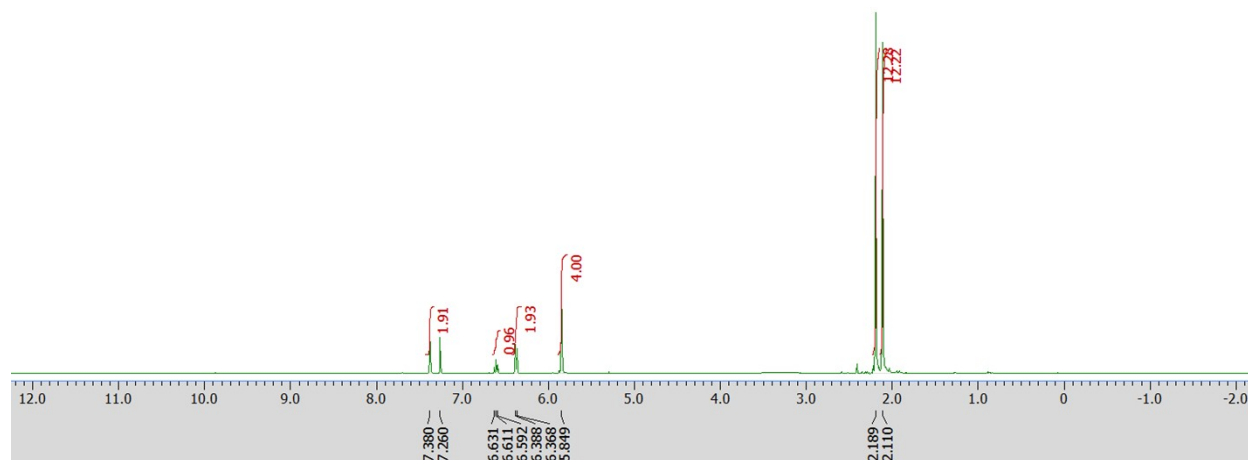**Figure S7.** <sup>1</sup>H-NMR of 1, CDCl<sub>3</sub>, 500 MHz.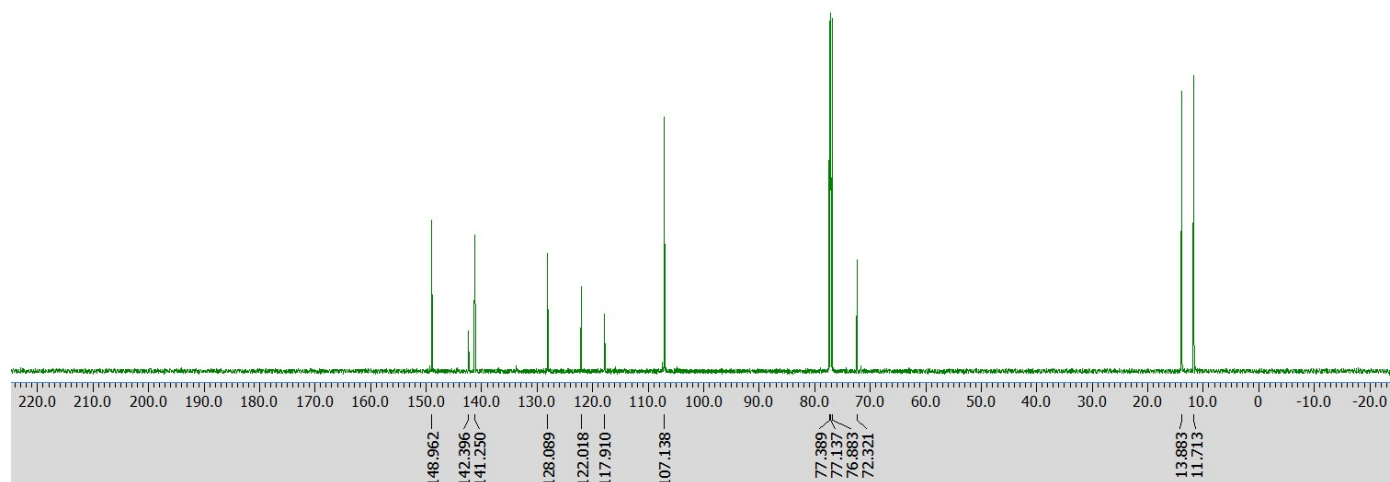**Figure S8.** <sup>13</sup>C-NMR of 1, CDCl<sub>3</sub>, 125 MHz.

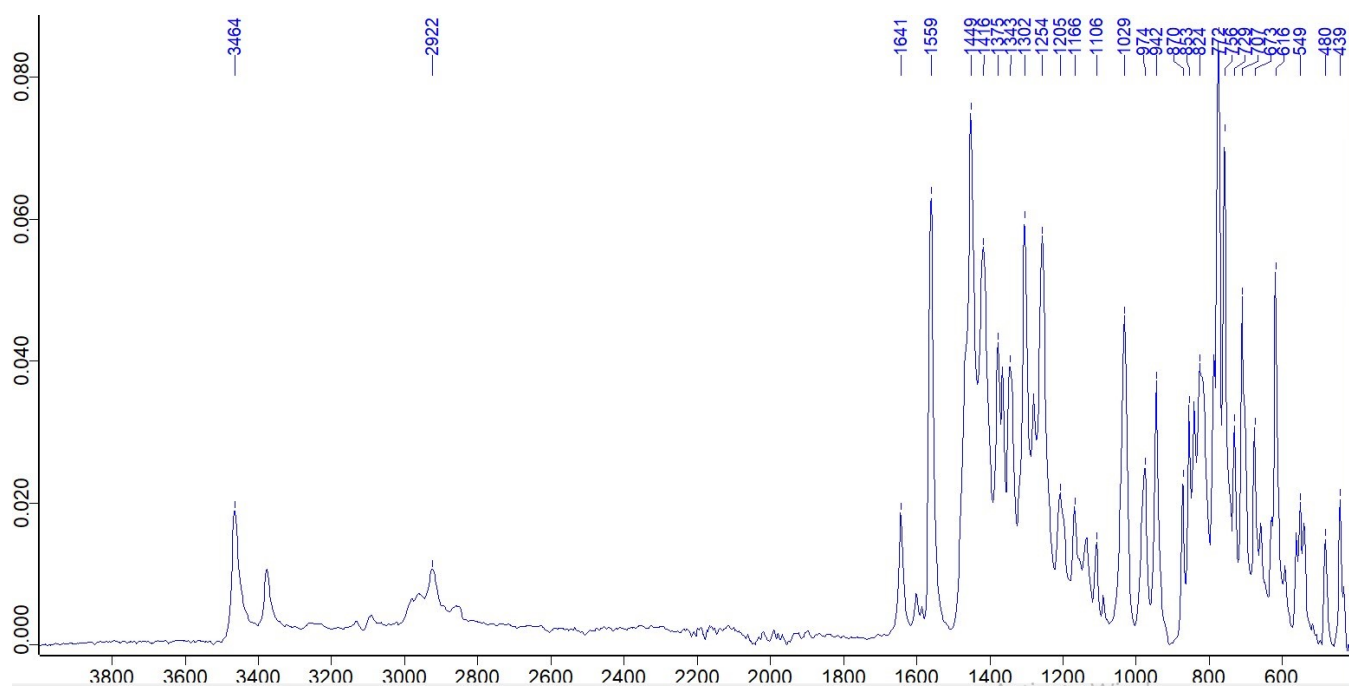

**Figure S9.** Infrared spectrum of **1**, diamond ATR.

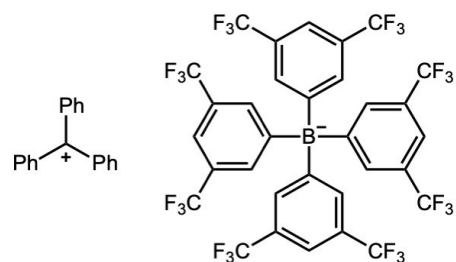

**trityl tetrakis(3,5-bis(trifluoromethyl)phenyl)borate**

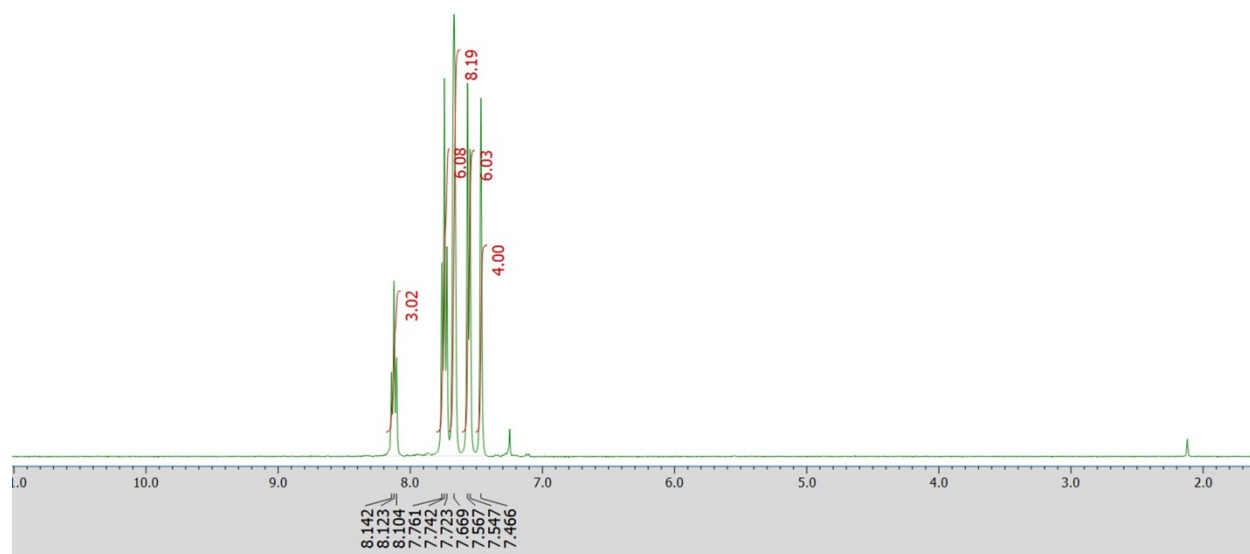

**Figure S10.**  $^1\text{H}$ -NMR of trityl *tetrakis*(3,5-*bis*(trifluoromethyl)phenyl)borate,  $\text{CD}_2\text{Cl}_2$ , 400 MHz.

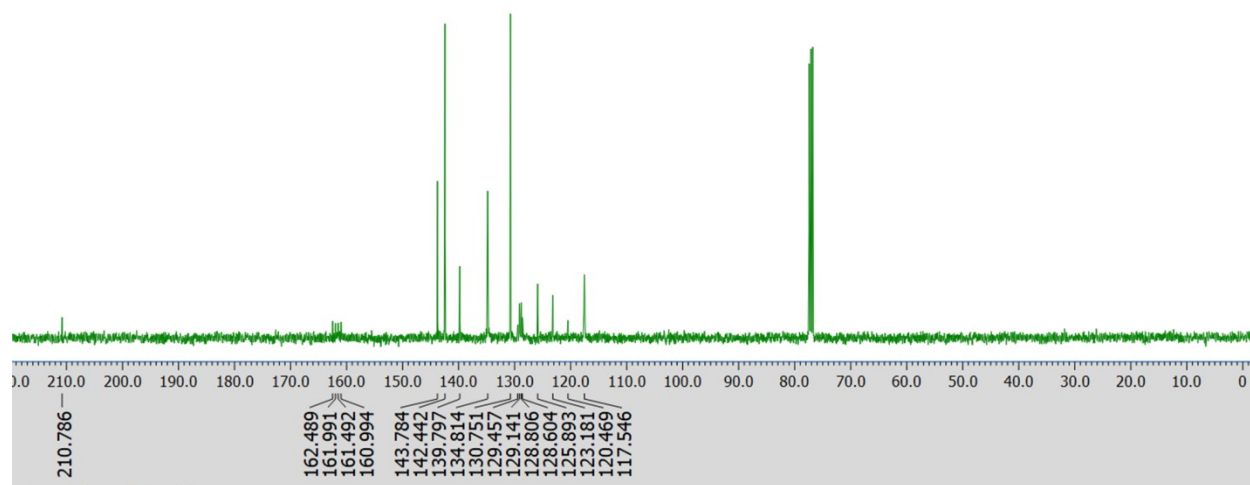

**Figure S11.**  $^{13}\text{C}$ -NMR of trityl *tetrakis*(3,5-*bis*(trifluoromethyl)phenyl)borate,  $\text{CD}_2\text{Cl}_2$ , 101 MHz.

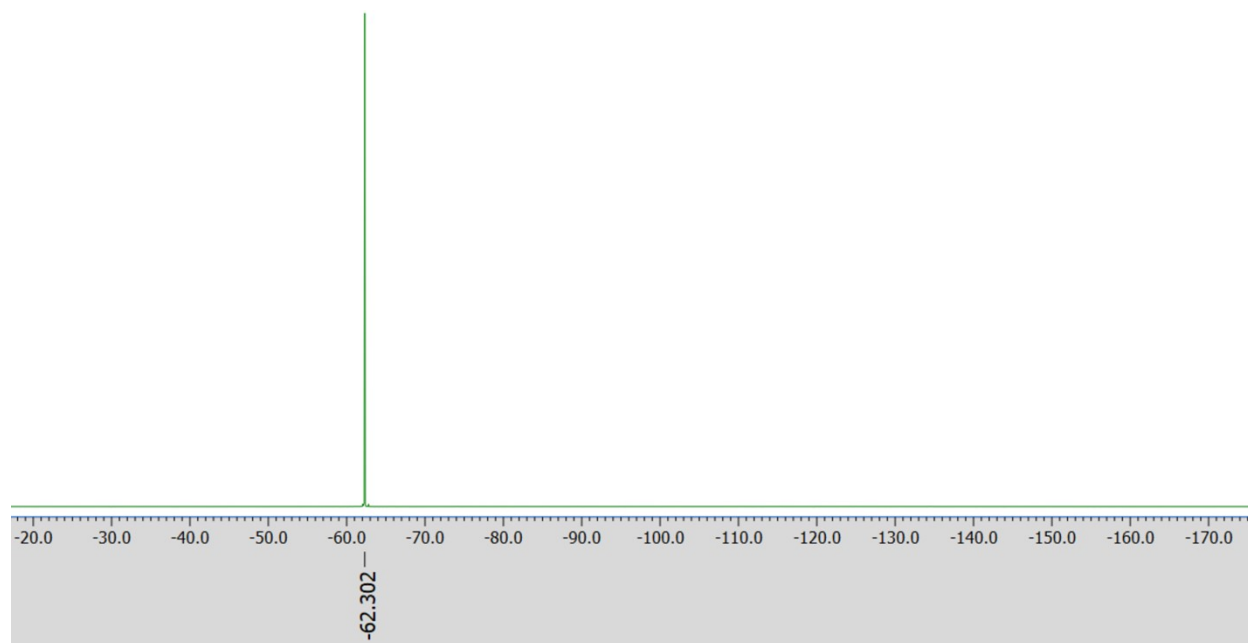

**Figure S12.**  $^{19}\text{F}$ -NMR of trityl tetrakis(3,5-*bis*(trifluoromethyl)phenyl)borate,  $\text{CD}_2\text{Cl}_2$ , 376 MHz.

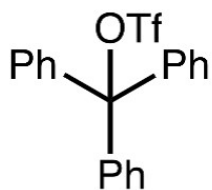

**trityl triflate**



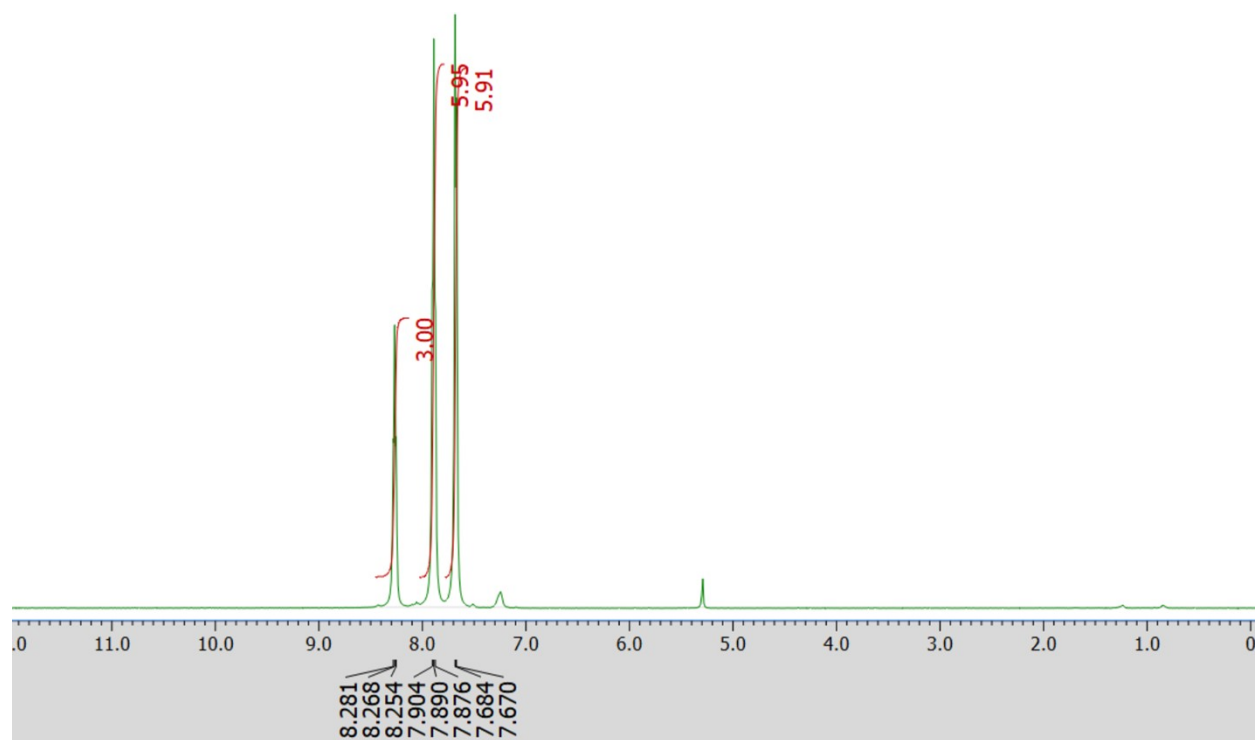

**Figure S13.**  $^1\text{H}$ -NMR of trityl triflate,  $\text{CD}_2\text{Cl}_2$ , 500 MHz.

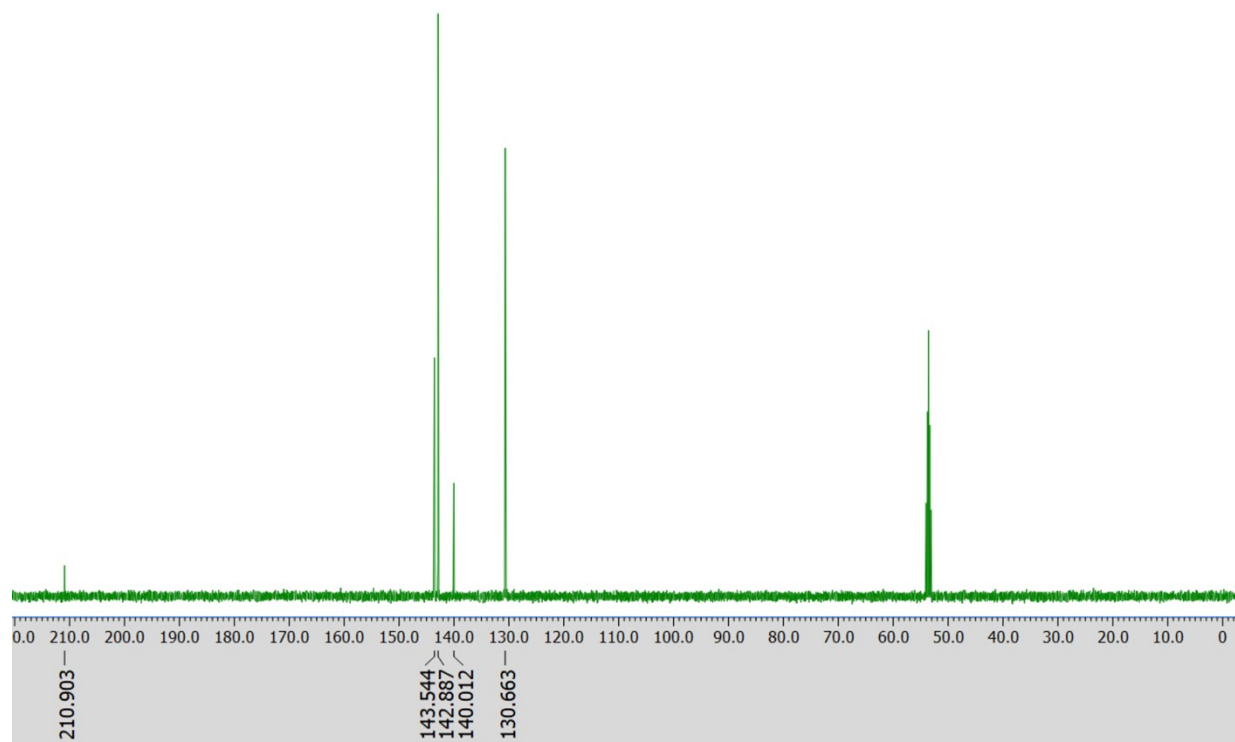

**Figure S14.**  $^{13}\text{C}$ -NMR of trityl triflate,  $\text{CD}_2\text{Cl}_2$ , 126 MHz.

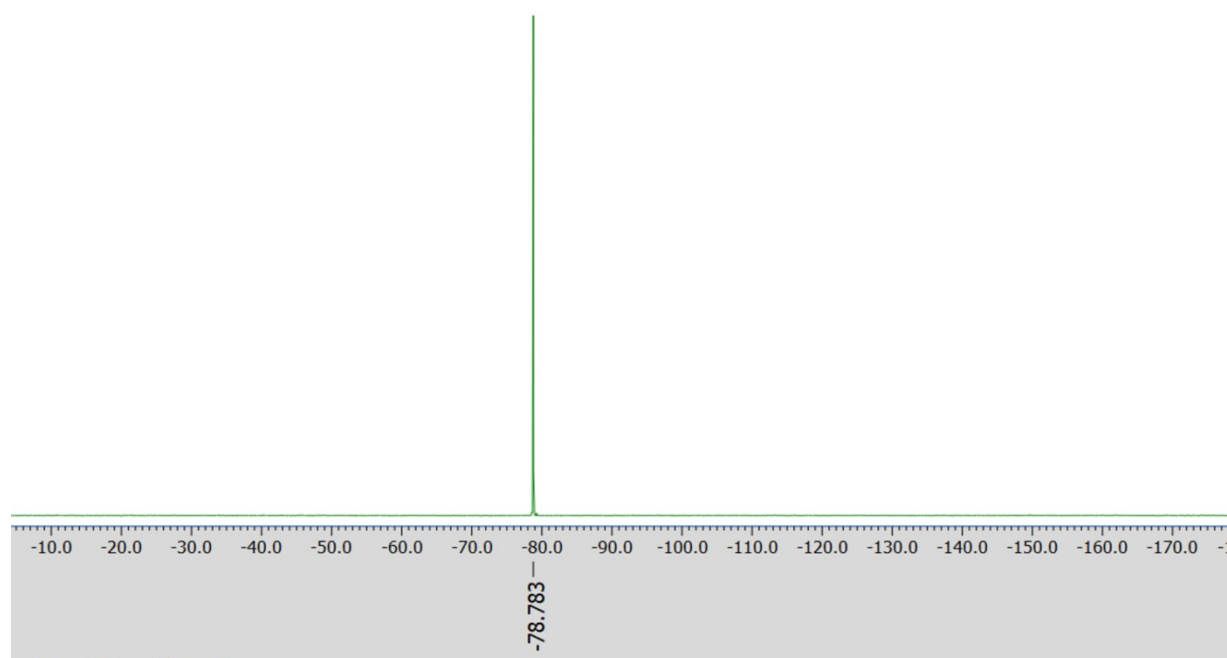

**Figure S15.**  $^{19}\text{F}$ -NMR of trityl triflate,  $\text{CD}_2\text{Cl}_2$ , 470 MHz.

### S4. Synthesis of dizinc complexes.

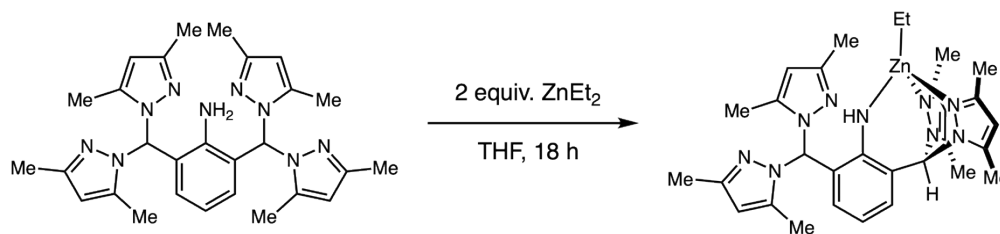

*Section S4.1.* Synthesis of  $\text{AD}^{\text{Me}}\text{HZnEt}$  (**7**). In a nitrogen glovebox, a vial was charged with  $\text{AD}^{\text{Me}}\text{H}_2$  (**1**) (25 mg, 0.05 mmol, 1 equivalent), diethylzinc (10.4  $\mu\text{L}$ , 0.10 mmol, 2 equivalents), and THF (3 mL). After stirring for 18 hours, volatiles were removed under vacuum down to a pale yellow solid (29.3 mg, 0.049 mmol, 99% yield).  $^1\text{H-NMR}$  (400 MHz,  $\text{CDCl}_3$ )  $\delta$  7.29 (s, 1H), 6.90-6.88 (m, 2H), 5.98-5.93 (m, 2H), 5.88 (s, 2H), 5.76 (s, 2H), 3.52 (s, 1H), 2.40 (s, 6H), 2.26 (s, 6H), 2.18 (s, 6H), 2.00 (s, 6H), 1.21 (t,  $J = 8.1$  Hz, 3H), 0.14 (q,  $J = 8.1$  Hz, 2H).  $^{13}\text{C-NMR}$  (101 MHz,  $\text{CDCl}_3$ )  $\delta$  156.4, 149.1, 148.2 141.0, 139.8, 132.5, 129.7, 122.5, 117.1, 107.5, 106.3, 106.3, 74.1, 73.8, 14.0, 13.1, 13.0, 11.7, 11.7, -2.6. IR (Diamond ATR) 3386, 2919, 2840, 1596, 1556, 1385, 1357, 1323, 1279, 1262, 1247, 1209, 1191, 1118, 1100, 1046, 982, 958, 888, 861, 838, 810, 782, 743, 721, 707, 670, 604, 571, 555, 523, 511, 440 $\text{cm}^{-1}$ . Elemental analysis (based on formula  $\text{C}_{30}\text{H}_{39}\text{N}_9\text{Zn}$ ): C (59.79% found, 60.96% expected, 1.17% difference), H (6.64% found, 6.65% expected, 0.01% difference), N (20.72% found, 21.33% expected, 0.61% difference).

The conditions of this synthesis were subsequently modified by using a larger excess of  $\text{ZnEt}_2$  or by using a different solvent (Table S1). But we never observed a complex with the composition  $\text{AD}^{\text{Me}}\text{HZn}_2\text{Et}_3$  (**8**) or  $\text{AD}^{\text{Me}}\text{Zn}_2\text{Et}_2$  (**9**).

**Table S1.** Synthesis of  $\text{AD}^{\text{Me}}\text{HZnEt}$  (**12**) from excess  $\text{ZnEt}_2$ .

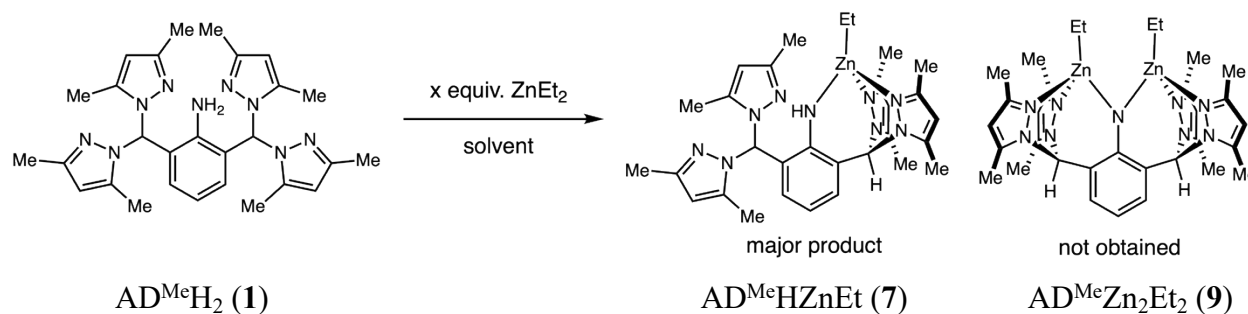

| ZnEt <sub>2</sub> equivalents | Solvent                         | Isolated Yield |
|-------------------------------|---------------------------------|----------------|
| 3 equiv.                      | THF                             | ≥ 99%          |
| 3 equiv.                      | Et <sub>2</sub> O               | ≥ 99%          |
| 2 equiv.                      | CH <sub>2</sub> Cl <sub>2</sub> | ≥ 99%          |
| 2 equiv.                      | THF                             | ≥ 99%          |
| 1 equiv.                      | toluene                         | 0%             |
| 1 equiv.                      | THF                             | 0%             |

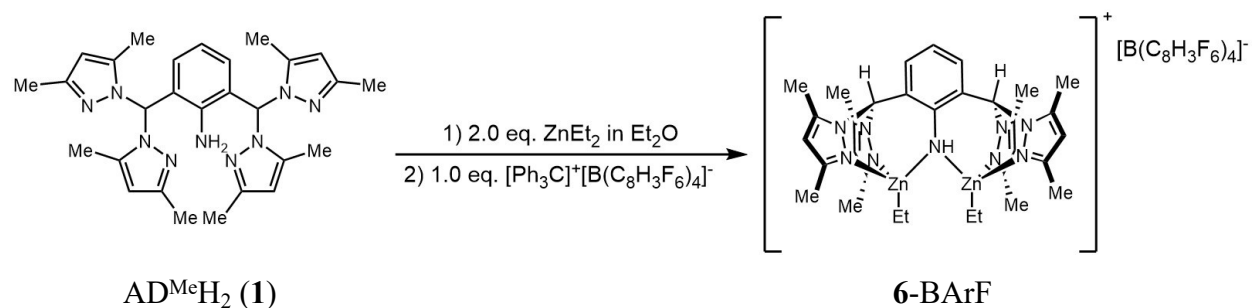

**6-BArF.** ([AD<sup>Me</sup>HZn<sub>2</sub>Et<sub>2</sub>][B(C<sub>8</sub>H<sub>3</sub>F<sub>6</sub>)<sub>4</sub>]). In a nitrogen glovebox, a vial was charged with AD<sup>Me</sup>H<sub>2</sub> (1) (25 mg, 0.050 mmol, 1 equivalent), diethylzinc (10.4 μL, 0.10 mmol, 2 equivalents), and diethyl ether (2 mL). After 5 minutes, a solution of trityl *tetrakis*(3,5-*bis*(trifluoromethyl)phenyl)borate<sup>8</sup> (Ph<sub>3</sub>CB(C<sub>8</sub>H<sub>3</sub>F<sub>6</sub>)<sub>4</sub>, 55.5 mg, 0.050 mmol, 1 equivalent) and Et<sub>2</sub>O (2 mL) was added. The reaction was judged to be complete after 5 minutes by the disappearance of the red-orange color of the trityl cation. Volatiles were removed under vacuum, leaving a pale yellow solid. Then, the solid was washed three times with totally 15 mL of hexanes, and the desired product was obtained as a white solid (69.7 mg, 0.045 mmol, 90 % yield). <sup>1</sup>H-NMR (400 MHz, CDCl<sub>3</sub>) δ 7.69 (s, 8H), 7.49 (s, 4H), 7.01 (d, J = 7.6 Hz, 2H), 6.92 (s, 2H), 6.60 (t, J = 7.6 Hz, 1H), 5.98 (s, 4H), 2.35 (s, 12H), 2.26 (s, 12H), 1.16 (t, J = 7.9 Hz, 6H), 0.28 (q, 4H). <sup>13</sup>C-NMR (101 MHz, CDCl<sub>3</sub>) δ 152.5, 152.3, 141.9, 134.9, 132.6, 129.8-129.1 (dd), 128.8-128.7 (dd), 125.9, 123.2, 121.3, 117.6 (bs), 107.5, 71.8, 13.2, 12.5, 11.2, -1.9. <sup>19</sup>F-NMR (470 MHz, CDCl<sub>3</sub>) δ -62.31. IR (Diamond ATR) 2858, 1609, 1560, 1461, 1422, 1388, 1353, 1043, 983, 962,

<sup>8</sup> Specklin, D.; Fliedel, C.; Gourlaouen, C.; Bruyere, J. C.; Avilés, T.; Boudon, C.; Dagorne, S. *N*-Heterocyclic Carbene Based Tri-organyl-Zn-Alkyl Cations: Synthesis, Structures, and Use in CO<sub>2</sub> Functionalization. *Chem. Eur. J.* **2017**, *23*, 5509-5519.

886, 860, 838, 798, 746, 711, 669, 600, 577, 509, 472, 449  $\text{cm}^{-1}$ . Elemental analysis (based on formula  $\text{C}_{64}\text{H}_{56}\text{BF}_{24}\text{N}_9\text{Zn}_2$ ): C (48.77% found, 49.63% expected, 0.86% difference), H (3.74% found, 3.64% expected, -0.10% difference), N (7.97% found, 8.14% expected, 0.17% difference).

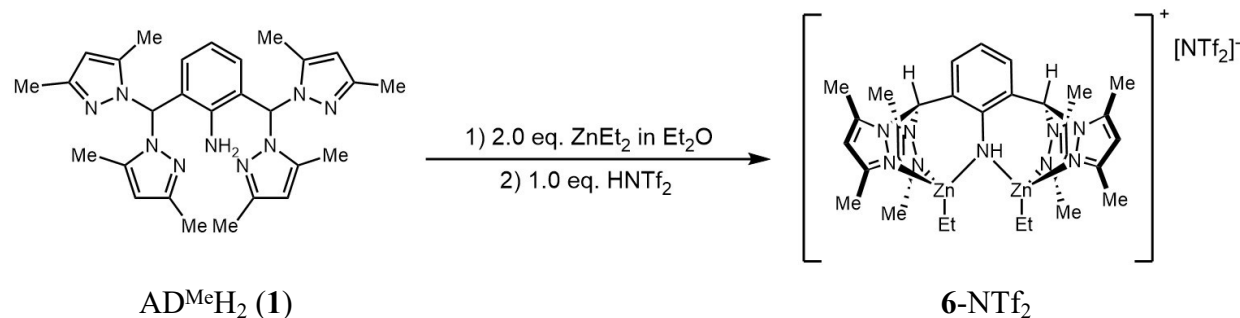

**6-NTf<sub>2</sub>**. ( $[\text{AD}^{\text{Me}}\text{HZn}_2\text{Et}_2][\text{NTf}_2]$ ). In a nitrogen glovebox, a vial was charged with  $\text{AD}^{\text{Me}}\text{H}_2$  (**1**) (25 mg, 0.05 mmol, 1 equivalent), diethylzinc (10.4  $\mu\text{L}$ , 0.10 mmol, 2 equivalents), and diethyl ether (2 mL). After 5 minutes, a solution of bis(trifluoromethanesulfonyl)imide ( $\text{HNTf}_2$ , 14.1 mg, 0.050 mmol, 1 equivalent) and  $\text{Et}_2\text{O}$  (2 mL) was added. The reaction was judged to be complete after 15 minutes by the appearance of white solid precipitate. Volatiles were removed under vacuum, giving our desired product as a white solid (44.4 mg, 0.046 mmol, 92 % yield).  $^1\text{H-NMR}$  (400 MHz,  $\text{CDCl}_3$ )  $\delta$  7.46 (d,  $J = 7.8$  Hz, 2H), 7.05 (t,  $J = 7.6$  Hz, 1H), 6.13 (s, 4H), 2.62 (s, 12H), 2.42 (s, 12H), 1.30 (t,  $J = 8.0$  Hz, 6H), 0.41 (q,  $J = 8.1$  Hz, 4H).  $^{13}\text{C-NMR}$  (101 MHz,  $\text{CDCl}_3$ )  $\delta$  151.9, 142.7, 133.4, 129.1, 121.6, 121.4, 107.3, 77.1, 76.8, 71.8, 13.3, 12.6, 11.5, -2.0.  $^{19}\text{F-NMR}$  (470 MHz,  $\text{CDCl}_3$ )  $\delta$  -78.69. IR (Diamond ATR) 1558, 1462, 1349, 1181, 1135, 1050, 985, 884, 858, 786, 751, 738, 702, 615, 569, 513, 470  $\text{cm}^{-1}$ . Elemental analysis (based on formula  $\text{C}_{34}\text{H}_{44}\text{F}_6\text{N}_{10}\text{O}_4\text{S}_2\text{Zn}_2$ ): C (41.06 % found, 42.29 % expected, 1.23 % difference), H (4.54 % found, 4.59% expected, 0.05 % difference), N (14.09 % found, 14.51 % expected, 0.42 % difference).

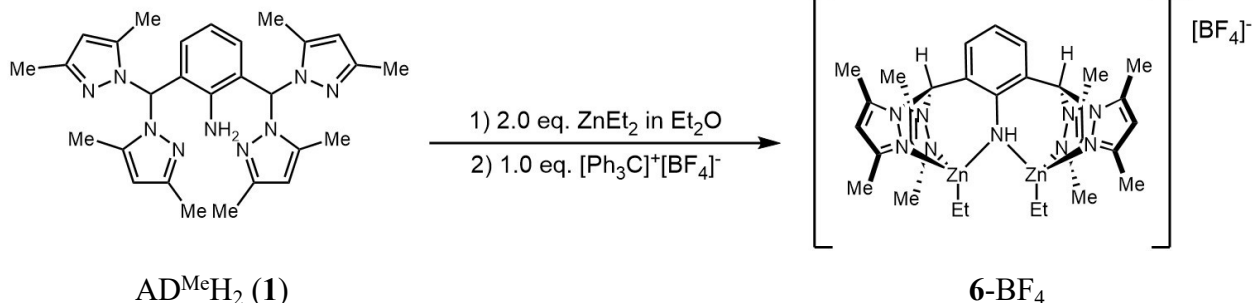

**6-BF<sub>4</sub>**. ([AD<sup>Me</sup>HZn<sub>2</sub>Et<sub>2</sub>][BF<sub>4</sub>]). In a nitrogen glovebox, a vial was charged with AD<sup>Me</sup>H<sub>2</sub> (**1**) (25 mg, 0.050 mmol, 1 equivalent), diethylzinc (10.4  $\mu$ L, 0.10 mmol, 2 equivalents), and diethyl ether (2 mL). After 5 minutes, a solution of trityl tetrafluoroborate (Ph<sub>3</sub>CBF<sub>4</sub>, 16.6 mg, 0.050 mmol, 1 equivalent) and Et<sub>2</sub>O (2 mL) was added. The reaction was judged to be complete after 5 minutes by the disappearance of the red-orange color of the trityl cation. Volatiles were removed under vacuum, yielding a pale yellow solid. Then, the solid was washed three times with totally 15 mL of hexanes, and the desired product was obtained as a white solid (33.2 mg, 0.043 mmol, 86 % yield). <sup>1</sup>H-NMR (400 MHz, CDCl<sub>3</sub>)  $\delta$  7.39 (d,  $J$  = 7.6 Hz, 2H), 7.20 (s, 2H), 6.87 (t,  $J$  = 7.6 Hz, 1H), 5.96 (s, 4H), 2.50 (s, 12H), 2.26 (s, 12H), 1.14 (t,  $J$  = 8.0 Hz, 6H), 0.24 (q,  $J$  = 8.1 Hz, 4H). <sup>13</sup>C-NMR (101 MHz, CDCl<sub>3</sub>)  $\delta$  152.1, 151.8, 143.0, 133.6, 128.9, 121.3, 107.2, 71.8, 13.3, 12.6, 11.5, -2.0. <sup>19</sup>F-NMR (376 MHz, CDCl<sub>3</sub>)  $\delta$  -151.72, -151.77. IR (Diamond ATR) 2848, 1594, 1559, 1455, 1422, 1388, 1363, 1319, 1243, 1089, 1050, 974, 953, 883, 851, 778, 762, 738, 700, 604, 574, 524, 502, 474 cm<sup>-1</sup>. Elemental analysis (based on formula C<sub>32</sub>H<sub>44</sub>BF<sub>4</sub>N<sub>9</sub>Zn<sub>2</sub>): C (48.96% found, 49.77% expected, 0.81% difference), H (5.33% found, 5.74% expected, 0.41% difference), N (15.30% found, 16.32% expected, 1.02% difference).

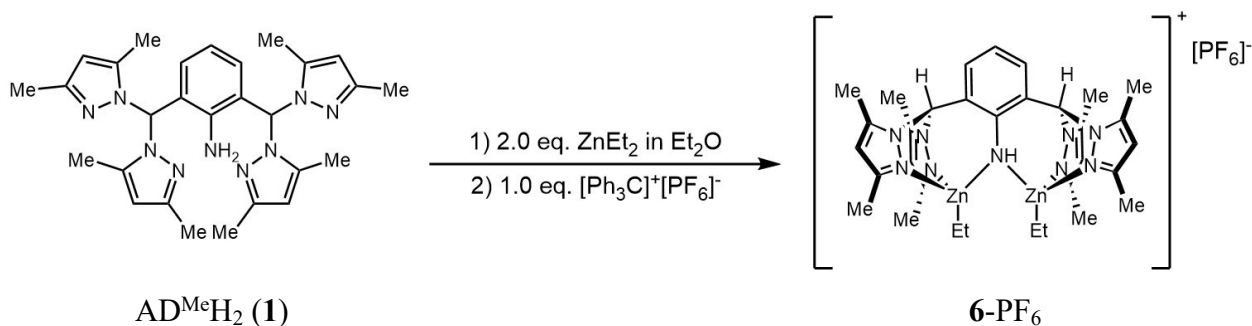

**6-PF<sub>6</sub>**. ([AD<sup>Me</sup>HZn<sub>2</sub>Et<sub>2</sub>][PF<sub>6</sub>]). In a nitrogen glovebox, a vial was charged with AD<sup>Me</sup>H<sub>2</sub> (**1**) (25 mg, 0.050 mmol, 1 equivalent), diethylzinc (10.4 μL, 0.10 mmol, 2 equivalents), and diethyl ether (2 mL). After 5 minutes, a solution of trityl hexafluorophosphate (Ph<sub>3</sub>CPF<sub>6</sub>, 19.5 mg, 0.0502 mmol, 1 equivalent) and Et<sub>2</sub>O (2 mL) was added. The reaction was judged to be complete after 5 minutes by the disappearance of the red-orange color of the trityl cation. Volatiles were removed under vacuum, yielding a pale yellow solid. Then, the solid was washed three times with totally 15 mL of hexanes, and the desired product was obtained as a white solid (36.5 mg, 0.044 mmol, 88 % yield). <sup>1</sup>H-NMR (400 MHz, CDCl<sub>3</sub>) δ 7.38 (d, *J* = 6.9 Hz, 2H), 7.12 (s, 2H), 6.98-6.95 (t, 1H), 5.98 (s, 4H), 2.48 (s, 12H), 2.26 (s, 12H), 1.18-1.14 (t, 6H), 0.30-0.25 (q, 4H). <sup>13</sup>C-NMR (101 MHz, CD<sub>2</sub>Cl<sub>2</sub>) δ 152.5, 152.1, 142.6, 133.0, 130.6, 127.9, 107.2, 71.9, 13.1, 12.4, 11.2, -2.0. <sup>19</sup>F-NMR (376 MHz, CD<sub>2</sub>Cl<sub>2</sub>) δ -73.30 (d, *J* = 710.2 Hz). IR (Diamond ATR) 2672, 2348, 2116, 1577, 1554, 1514, 1459, 1352, 1292, 1215, 1184, 957, 939, 782, 762, 726, 703, 658, 601, 569, 535, 512, 490, 437 cm<sup>-1</sup>. Elemental analysis (based on formula C<sub>32</sub>H<sub>44</sub>F<sub>6</sub>N<sub>9</sub>PZn<sub>2</sub>): C (47.14% found, 46.28% expected, 0.86% difference), H (5.26% found, 5.34% expected, 0.08% difference), N (13.40% found, 15.18% expected, 1.78% difference).

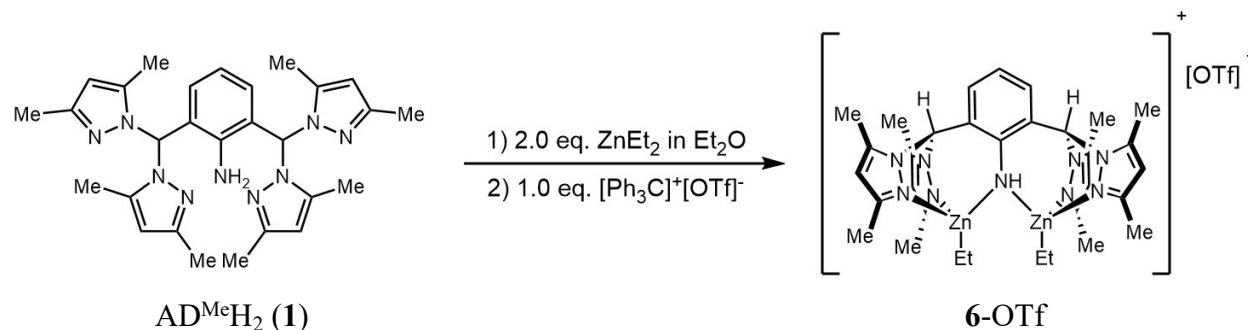

**6-OTf**. ([AD<sup>Me</sup>HZn<sub>2</sub>Et<sub>2</sub>][OTf]). In a nitrogen glovebox, a vial was charged with AD<sup>Me</sup>H<sub>2</sub> (**1**) (25 mg, 0.050 mmol, 1 equivalent), diethylzinc (10.4 μL, 0.10 mmol, 2 equivalents), and diethyl ether (2 mL). After 5 minutes, a solution of trityl triflate (Ph<sub>3</sub>COTf, 19.7 mg, 0.0502 mmol, 1 equivalent) and Et<sub>2</sub>O (2 mL) was added. The reaction was judged to be complete after 5 minutes by the disappearance of the red-orange color of the trityl cation. Volatiles were removed under vacuum down to a pale yellow solid. Then, the solid was washed three times with totally 15 mL of hexanes, and the desired product was obtained as a white solid (34.2 mg, 0.041 mmol, 82 % yield). <sup>1</sup>H-

NMR (400 MHz,  $\text{CD}_2\text{Cl}_2$ )  $\delta$  7.00 (s, 2H), 6.65 (s, 2H), 6.30-6.26 (t, 1H), 5.99 (s, 4H), 2.42 (s, 12H), 2.25 (s, 12H), 1.07-1.04 (t, 6H), 0.11 (dd,  $J = 15.8, 8.3$  Hz, 4H).  $^{13}\text{C}$ -NMR (101 MHz,  $\text{CD}_2\text{Cl}_2$ )  $\delta$  155.4, 151.2, 142.0, 132.4, 122.2, 122.0, 106.9, 71.1, 13.0, 12.4, 11.3, -2.3.  $^{19}\text{F}$ -NMR (376 MHz,  $\text{CD}_2\text{Cl}_2$ )  $\delta$  -78.76. IR (Diamond ATR) 2852, 1595, 1561, 1457, 1421, 1389, 1364, 1306, 1235, 1209, 1166, 1130, 1045, 1021, 986, 953, 879, 846, 804, 744, 696, 644, 617, 600, 572, 516, 478  $\text{cm}^{-1}$ . Elemental analysis (based on formula  $\text{C}_{33}\text{H}_{44}\text{F}_3\text{N}_9\text{O}_3\text{SZn}_2$ ): C (46.02% found, 47.49% expected, 1.47% difference), H (5.22% found, 5.31% expected, 0.09% difference), N (14.39% found, 15.10% expected, 0.71% difference).

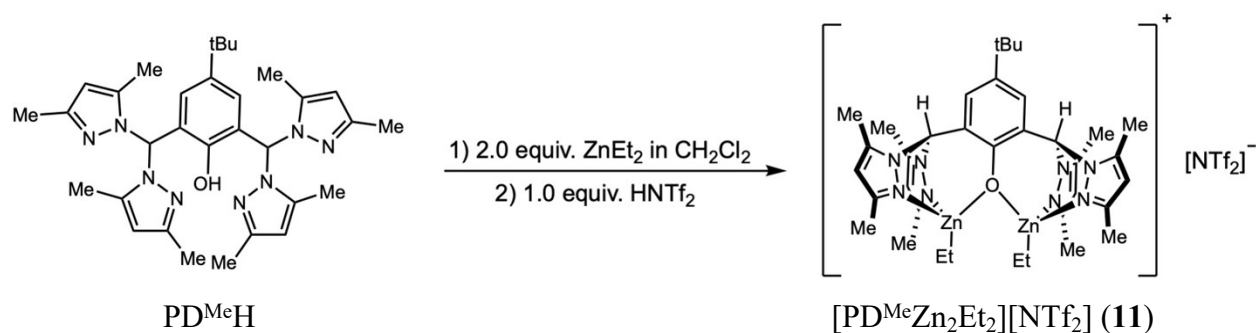

$[\text{PD}^{\text{Me}}\text{Zn}_2\text{Et}_2][\text{NTf}_2]$  (**11**). In a nitrogen glovebox, a vial was charged with  $\text{PD}^{\text{Me}}\text{H}$  (27.0 mg, 0.049 mmol, 1 equivalent), diethylzinc (10  $\mu\text{L}$ , 0.98 mmol, 2 equivalents), and  $\text{CH}_2\text{Cl}_2$  (2 mL). After 5 minutes, a solution of trifluoromethanesulfonimide ( $\text{HNTf}_2$ , 13.7 mg, 0.049 mmol, 1 equivalent) and  $\text{CH}_2\text{Cl}_2$  (2 mL) was added. The reaction was judged to be complete after 15 minutes by the appearance of white solid precipitate. Volatiles were removed under vacuum, giving our desired product as a white solid (45.10 mg, 0.044 mmol, 90 % yield).  $^1\text{H}$ -NMR (400 MHz,  $\text{CD}_2\text{Cl}_2$ )  $\delta$  7.09 (s, 2H), 6.92 (s, 2H), 6.01 (s, 4H), 2.42 (s, 12H), 2.28 (s, 12H), 1.23 (s, 9H), 1.18 (t,  $J = 8.1$  Hz, 6H), 0.35 (q,  $J = 8.1$  Hz, 4H).  $^{13}\text{C}$ -NMR (101 MHz,  $\text{CD}_2\text{Cl}_2$ )  $\delta$  158.2, 152.0, 142.2, 140.6, 129.7, 125.6, 107.1, 71.6, 33.7, 30.9, 13.2, 12.0, 11.3, -1.7.  $^{19}\text{F}$ -NMR (376 MHz,  $\text{CD}_2\text{Cl}_2$ )  $\delta$  -79.4. IR (Diamond ATR) 2931, 2897, 2859, 1558, 1483, 1465, 1423, 1383, 1344, 1324, 1223, 1186, 1137, 1054, 986, 954, 917, 892, 855, 836, 813, 786, 760, 737, 709, 679, 657, 632, 608, 569, 511, 469, 441, 411  $\text{cm}^{-1}$ . Elemental analysis (based on formula  $\text{C}_{38}\text{H}_{51}\text{F}_6\text{N}_9\text{O}_5\text{S}_2\text{Zn}_2$ ): C (42.70% found, 44.63% expected, 1.93% difference), H (4.44% found, 5.03% expected, 0.59% difference), N (11.62% found, 12.33% expected, 0.71% difference).



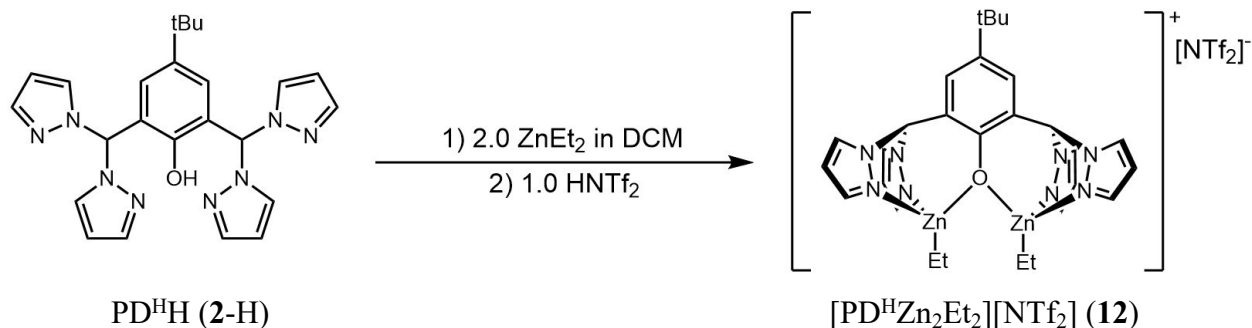

$[\text{PD}^{\text{H}}\text{Zn}_2\text{Et}_2][\text{NTf}_2]$  (**12**). In a nitrogen glovebox, a vial was charged with  $\text{PD}^{\text{H}}\text{H}$  (**2-H**) (88 mg, 0.2 mmol, 1 equivalent), diethylzinc (42  $\mu\text{L}$ , 0.4 mmol, 2 equivalent), and dichloromethane (3 mL). After 1 minute, a solution of *bis*(trifluoromethanesulfonyl)imide ( $\text{HNTf}_2$  56 mg, 0.2 mmol, 1 equivalents) and  $\text{CH}_2\text{Cl}_2$  (2 mL) was added, resulting in the evolution of gas. After five minutes, no bubbles were observed and the reaction was deemed to be complete. Volatiles were removed under vacuum down to a white solid (177 mg, 0.195 mmol, 98% yield).  $^1\text{H-NMR}$  (400 MHz,  $\text{CD}_2\text{Cl}_2$ )  $\delta$  8.03 (d,  $J = 2.5$  Hz, 4H), 7.71 (d,  $J = 2.0$  Hz, 4H), 7.59 (s, 2H), 7.40 (s, 2H), 6.42 (t,  $J = 2.3$  Hz, 4H), 1.25 (t,  $J = 8.0$  Hz, 6H), 1.19 (s, 9H), 0.42 (q,  $J = 8.2$  Hz, 4H).  $^{13}\text{C-NMR}$  (101 MHz,  $\text{CD}_2\text{Cl}_2$ )  $\delta$  157.4, 142.1, 141.1, 133.1, 131.4, 125.1, 107.1, 78.0, 33.9, 30.8, 12.7, -2.3. The spectrum matches with the existing literature report.<sup>9</sup>

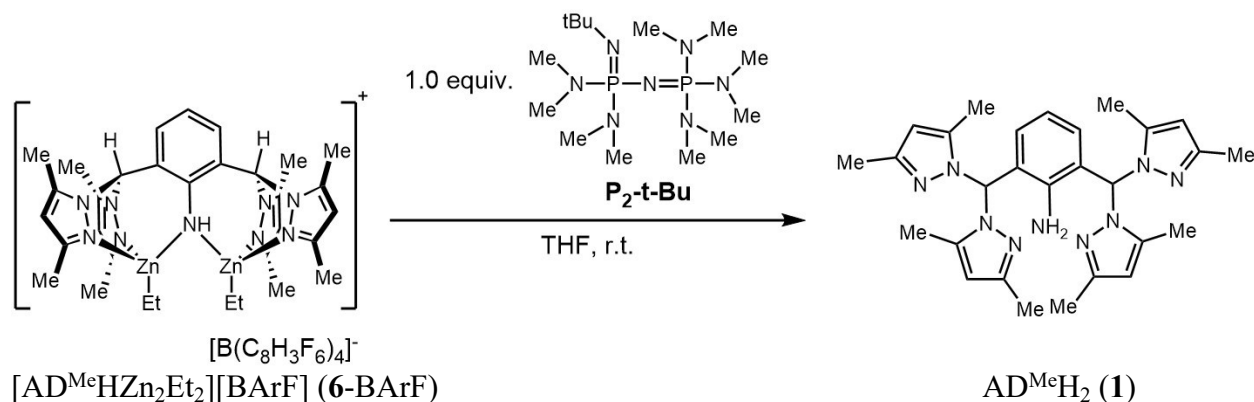

Section S4.2. Deprotonation of  $[\text{AD}^{\text{Me}}\text{HZn}_2\text{Et}_2][\text{B}(\text{C}_8\text{H}_3\text{F}_6)_4]$  (**6-BArF**). In a nitrogen glovebox,  $[\text{AD}^{\text{Me}}\text{HZn}_2\text{Et}_2][\text{B}(\text{C}_8\text{H}_3\text{F}_6)_4]$  (**6-BArF**) (15.50 mg, 0.01 mmol, 1 equivalents) was weighed out in

<sup>9</sup>Gu, Z.; Comito, R. J. Binucleating *Bis*(Pyrazolyl)Alkane Ligands and Their Cationic Dizinc Complexes: Modular, Bimetallic Catalysts for Ring-Opening Polymerization. *Organometallics* **2022**, *41*, 1911–1916.

a dry vial. THF (2 mL) which was degassed and dried prior use was added into the vial to dissolve the solid giving a clear solution. To the clear solution, P<sub>2</sub>-t-Bu 2.0 M in THF solution (5.0 μL, 0.01 mmol, 1 equivalents) was added using a micropipette. Upon addition the solution turned cloudy due to precipitate formation. The vial was left stirring for overnight under nitrogen atmosphere. Later, the volatiles were removed under vacuum to give a white powdery solid. The solid was partially soluble in CD<sub>2</sub>Cl<sub>2</sub>, which was then taken for NMR analysis. The <sup>1</sup>H NMR analysis of the crude reaction mixture completely matched with our proligand AD<sup>Me</sup>H<sub>2</sub> (**1**), **5** along with residual P<sub>2</sub>-t-Bu. <sup>1</sup>H-NMR (400 MHz, CD<sub>2</sub>Cl<sub>2</sub>) δ 7.70 (s, 8H), 7.54 (s, 4H), 7.30 (s, 2H), 6.60 (t, J = 7.8 Hz, 1H), 6.43 (d, J = 7.8 Hz, 2H), 5.85 (s, 4H), 2.15 (s, 12H), 2.08 (s, 12H).

Deprotonation of [AD<sup>Me</sup>HZn<sub>2</sub>Et<sub>2</sub>][B(C<sub>8</sub>H<sub>3</sub>F<sub>6</sub>)<sub>4</sub>] using lithium bases like LiHMDS, PhLi and n-BuLi in THF and Et<sub>2</sub>O did not give the desired product but instead produced a complex mixture of products. Also, deprotonation using TBD (1,5,7-Triazabicyclo[4.4.0]dec-5-ene) gave us the proligand AD<sup>Me</sup>H<sub>2</sub>, (**1**).

**S5. Spectral data of metal complexes.**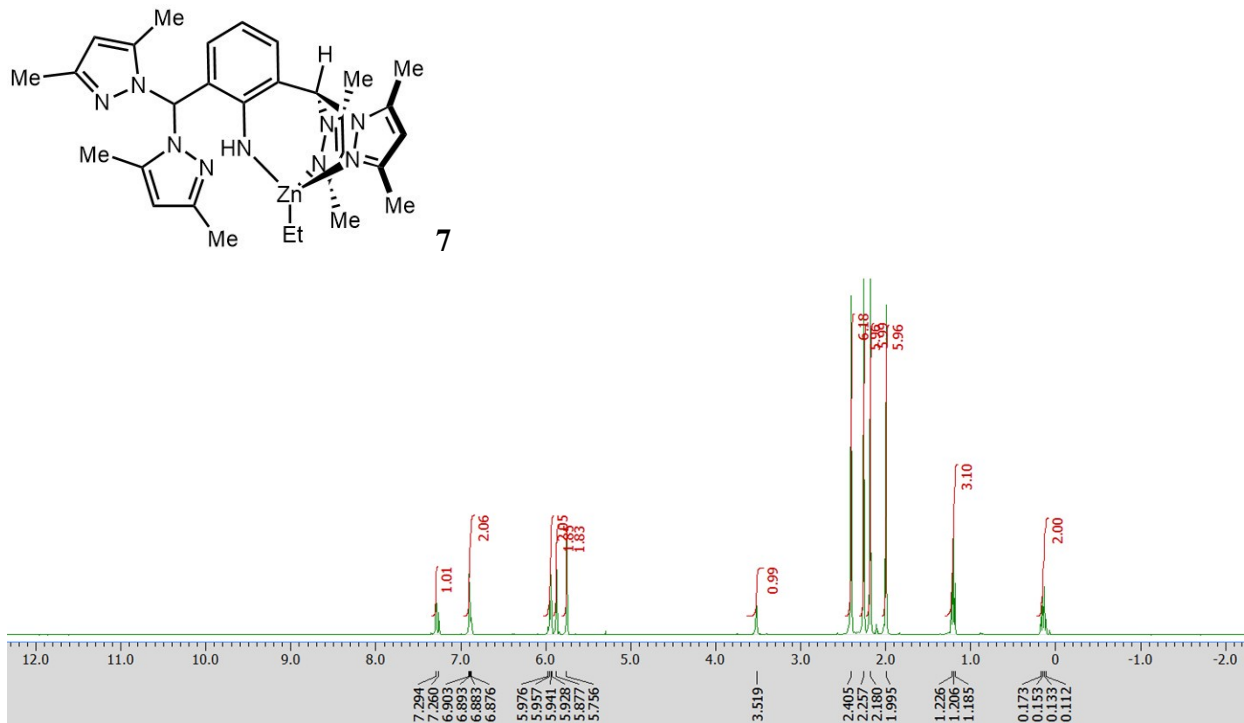**Figure S16.**  $^1\text{H-NMR}$  of **7**,  $\text{CDCl}_3$ , 400 MHz.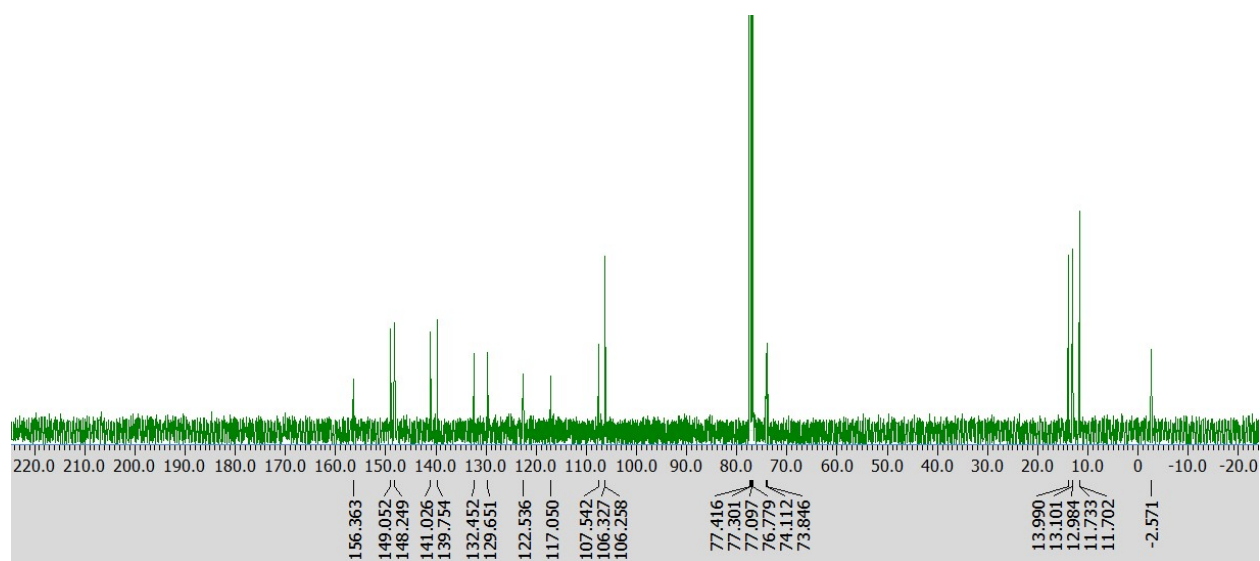**Figure S17.**  $^{13}\text{C-NMR}$  of **7**,  $\text{CDCl}_3$ , 101 MHz.

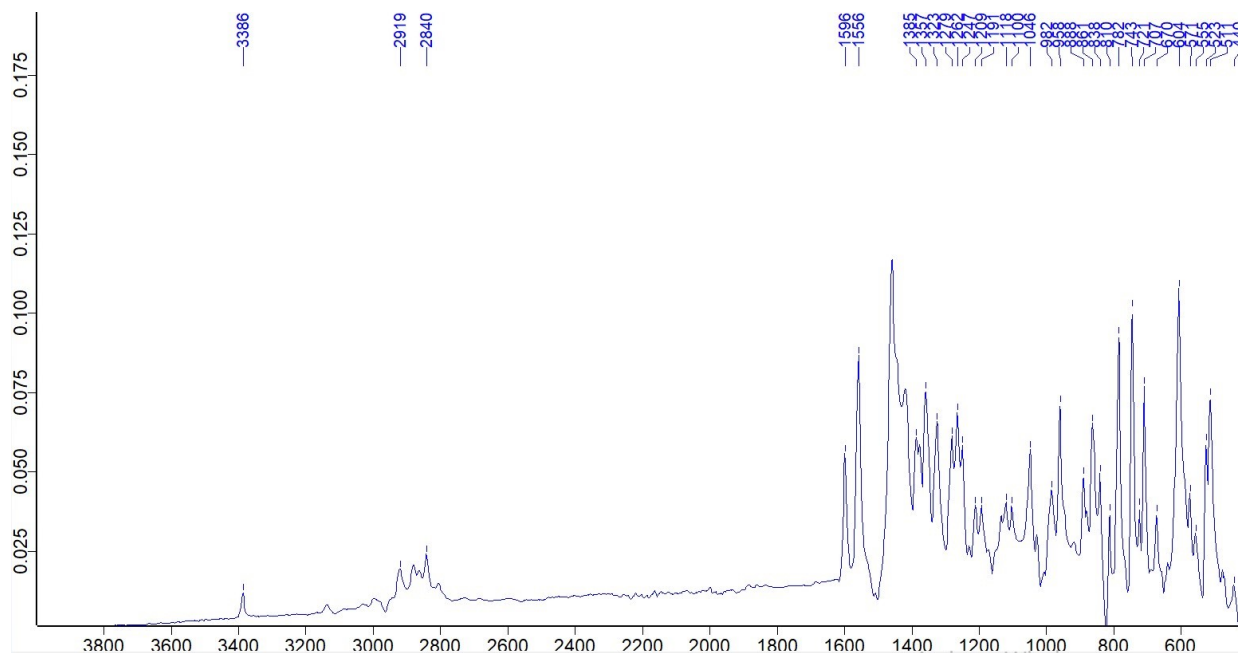**Figure S18.** Infrared spectrum of **7**, diamond ATR.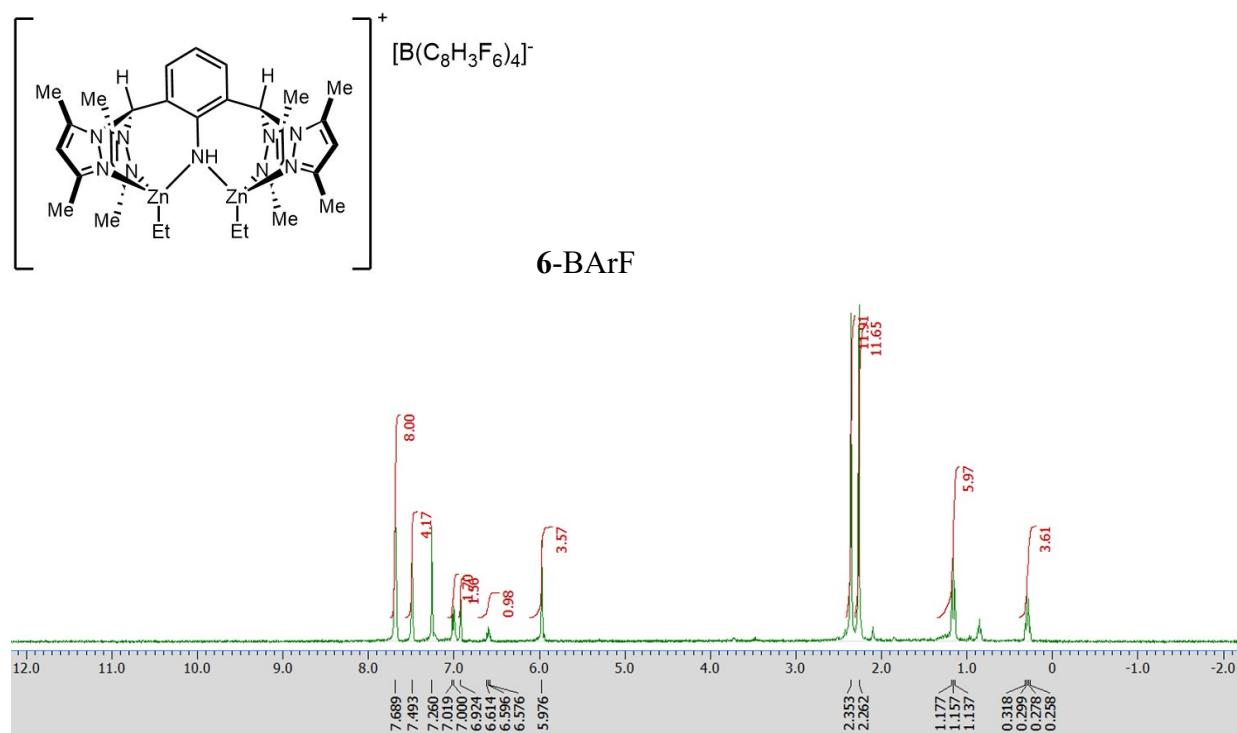**Figure S19.**  $^1\text{H}$ -NMR of **6-BArF**,  $\text{CDCl}_3$ , 400 MHz.

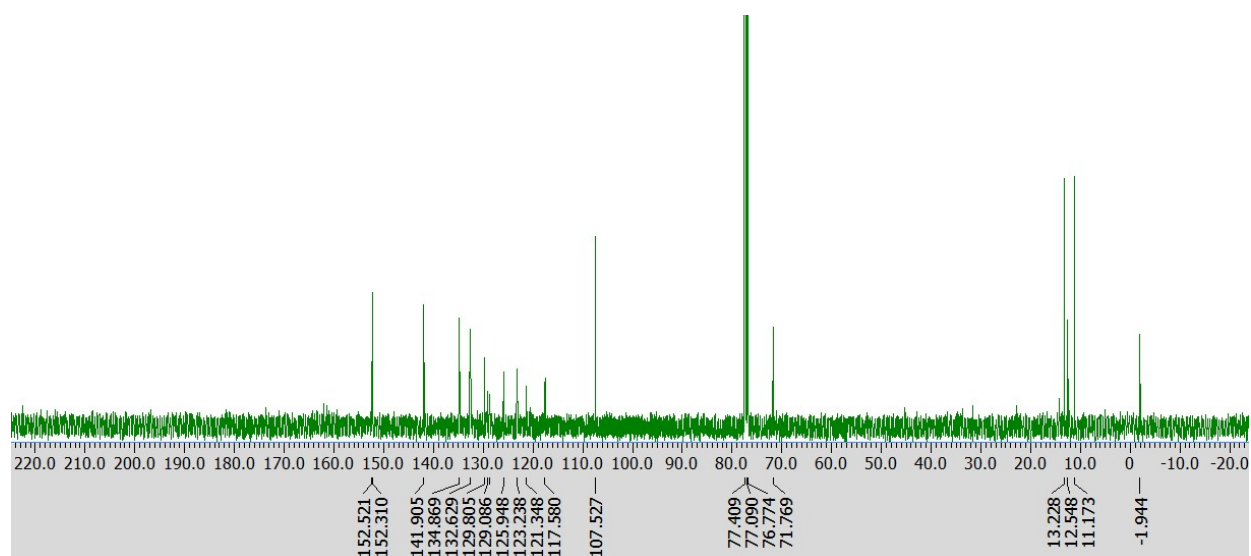

**Figure S20.** <sup>13</sup>C-NMR of 6-BArF, CDCl<sub>3</sub>, 101 MHz.

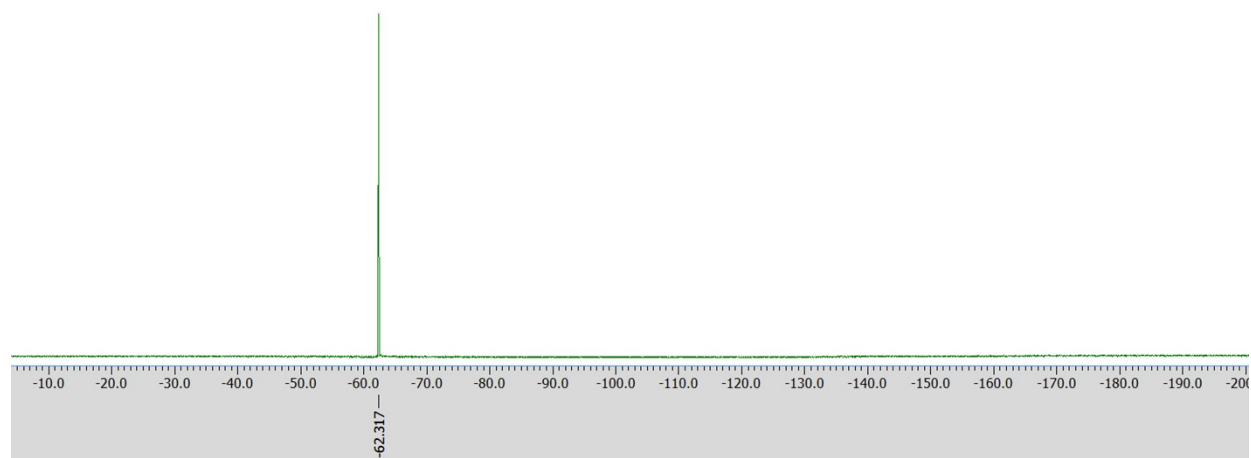

**Figure S21.** <sup>19</sup>F-NMR of 6-BArF, CDCl<sub>3</sub>, 470 MHz.

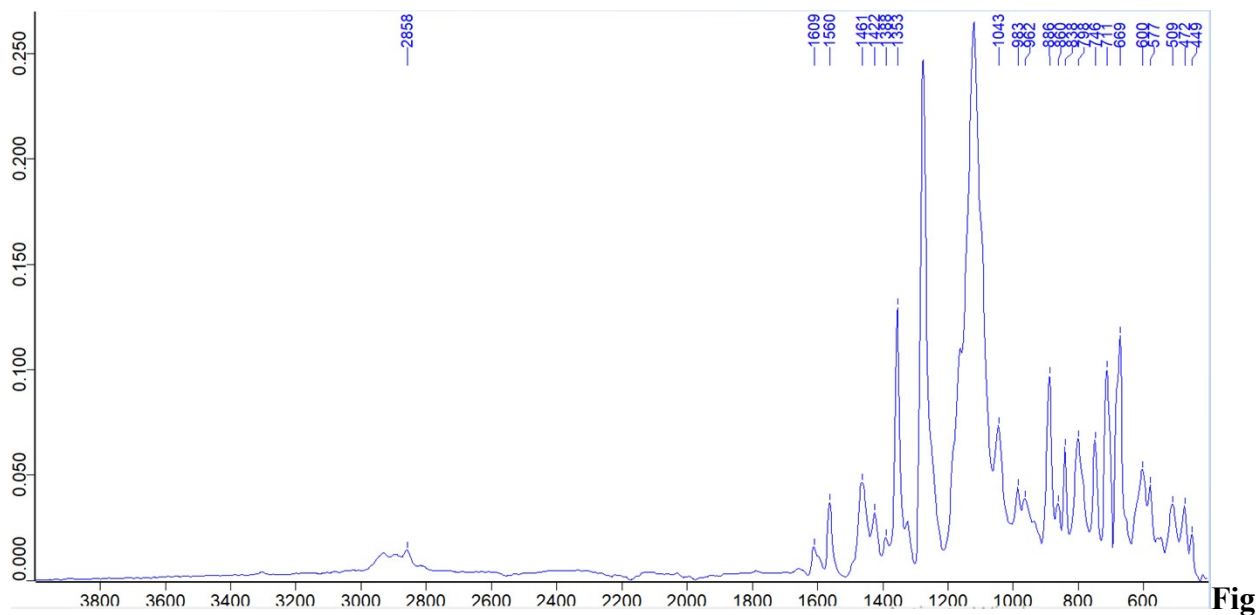

Figure S22. Infrared spectrum of **6**-BArF, diamond ATR.

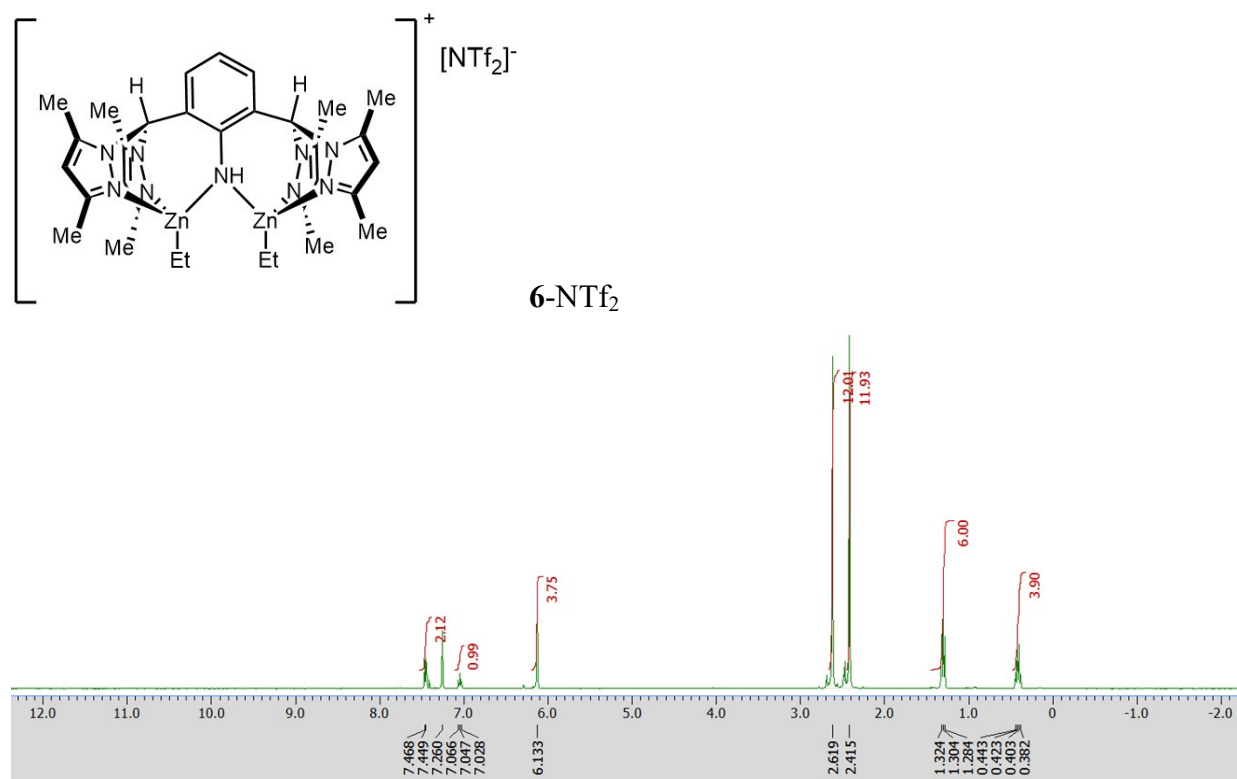

Figure S23.  $^1\text{H}$ -NMR of **6**-NTf<sub>2</sub>, CDCl<sub>3</sub>, 400 MHz.

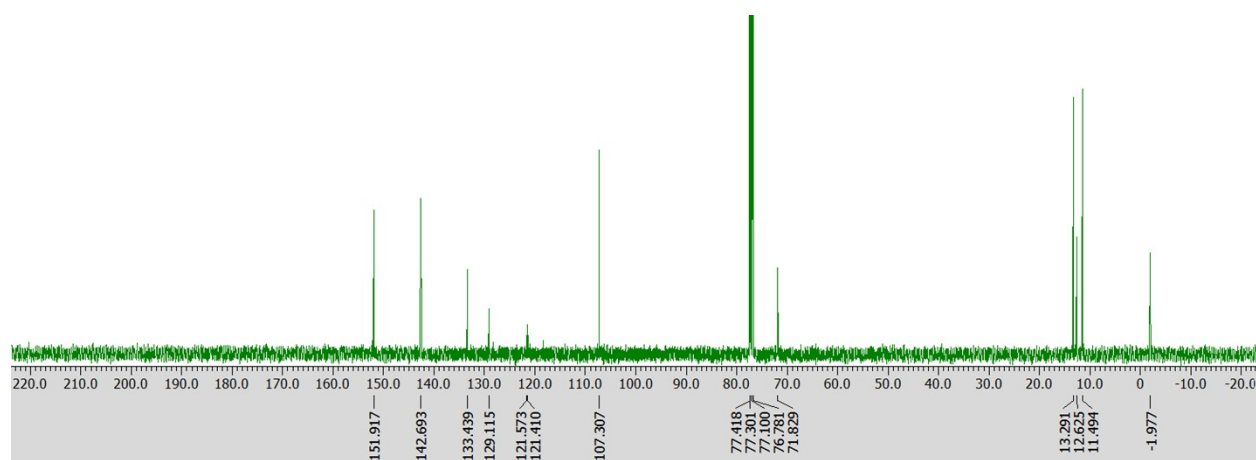

**Figure S24.**  $^{13}\text{C}$ -NMR of **6-NTf<sub>2</sub>**,  $\text{CDCl}_3$ , 101 MHz.

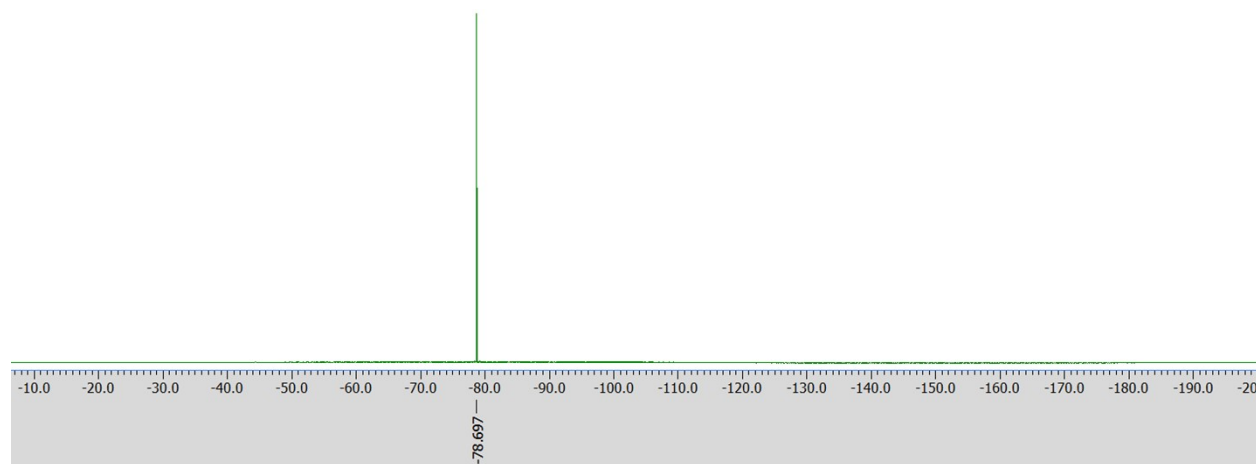

**Figure S25.**  $^{19}\text{F}$ -NMR of **6-NTf<sub>2</sub>**,  $\text{CDCl}_3$ , 376 MHz.

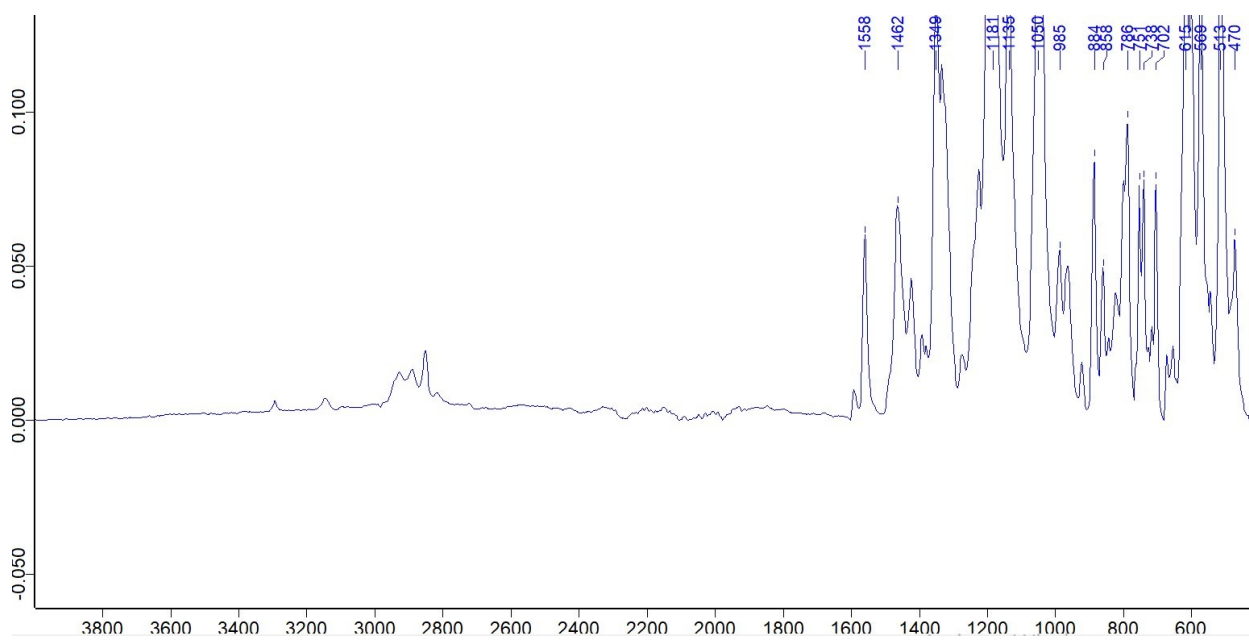

**Figure S26.** Infrared spectrum of 6-NTf<sub>2</sub>, diamond ATR.



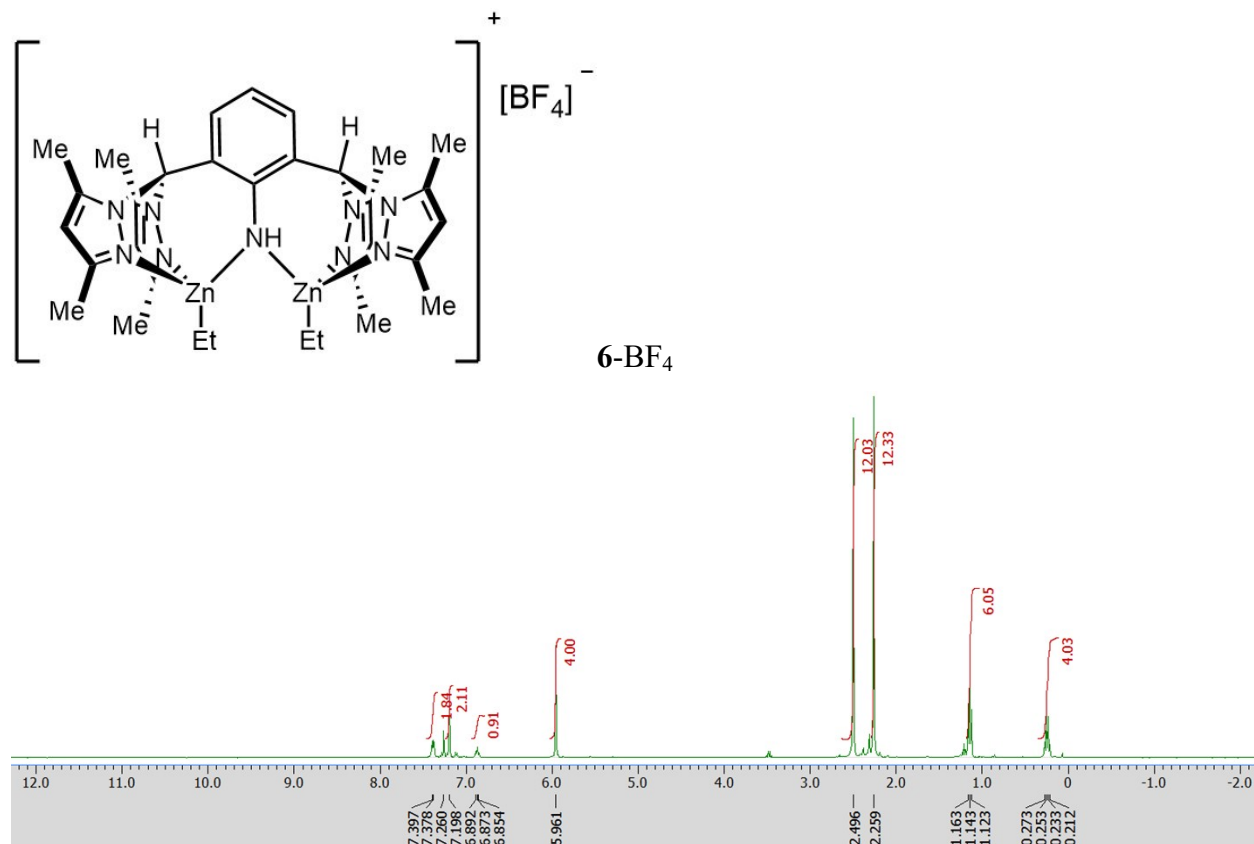

Figure S27. <sup>1</sup>H-NMR of **6-BF<sub>4</sub>**, CDCl<sub>3</sub>, 400 MHz.

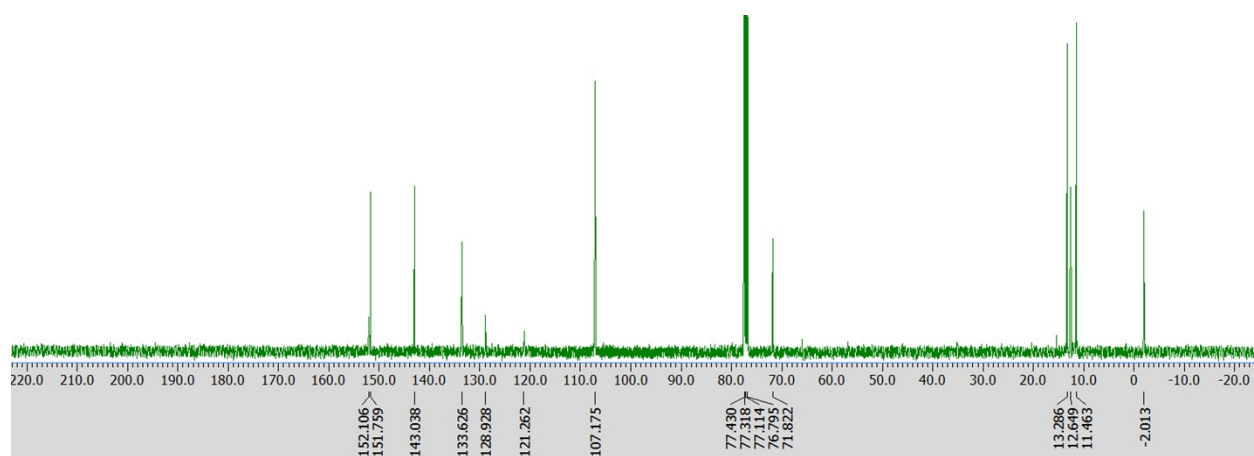

Figure S28. <sup>13</sup>C-NMR of **6-BF<sub>4</sub>**, CDCl<sub>3</sub>, 101 MHz.

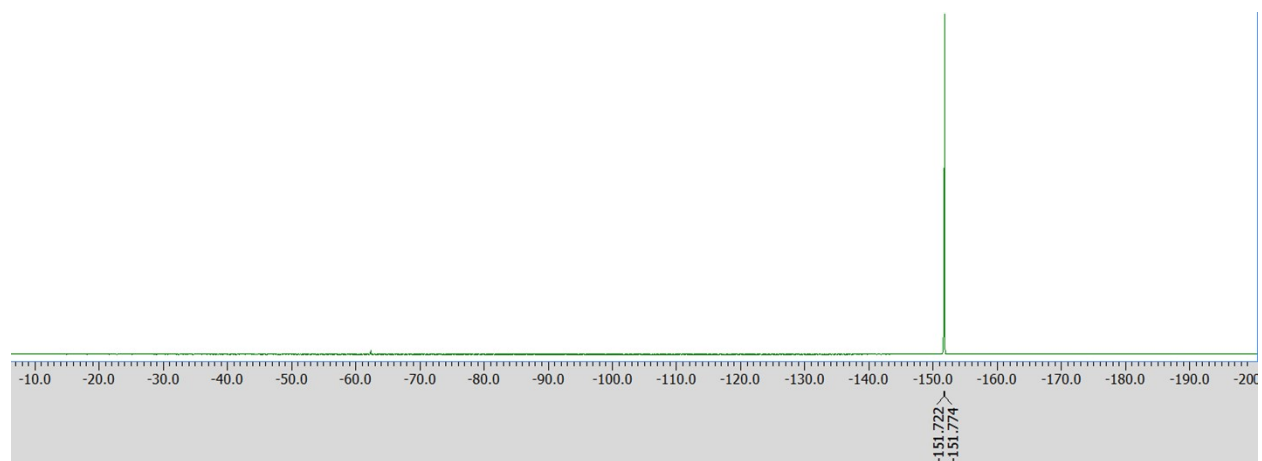

**Figure S29.**  $^{19}\text{F}$ -NMR of **6-BF<sub>4</sub>**,  $\text{CDCl}_3$ , 376 MHz.

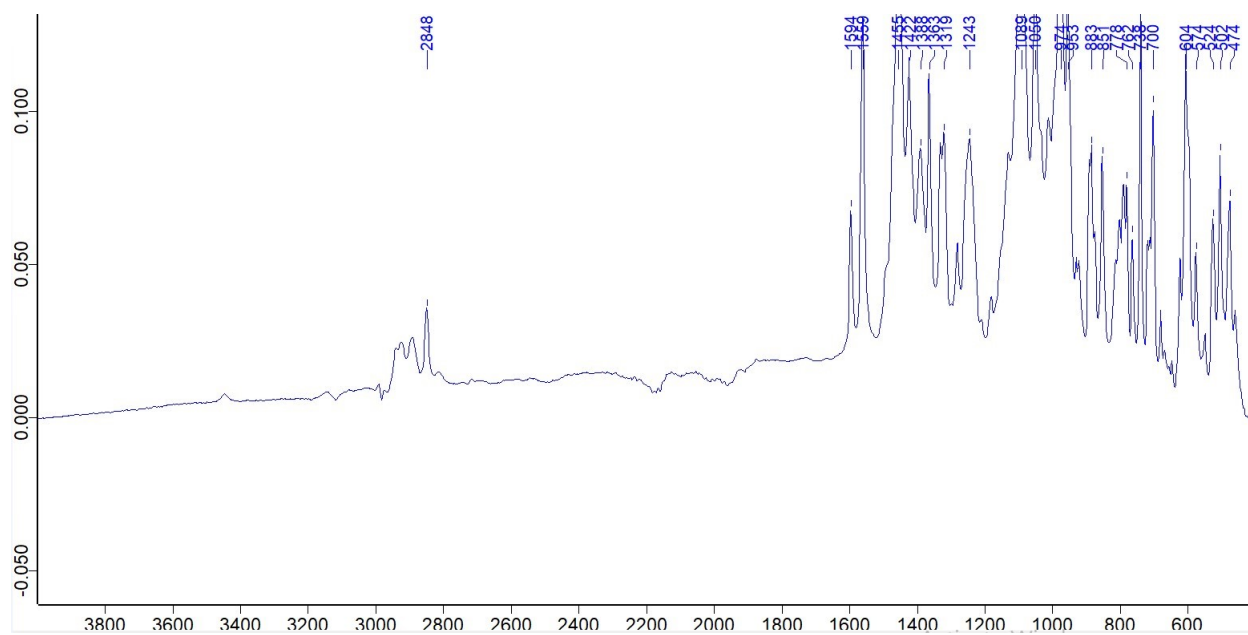

**Figure S30.** Infrared spectrum of **6-BF<sub>4</sub>**, diamond ATR.

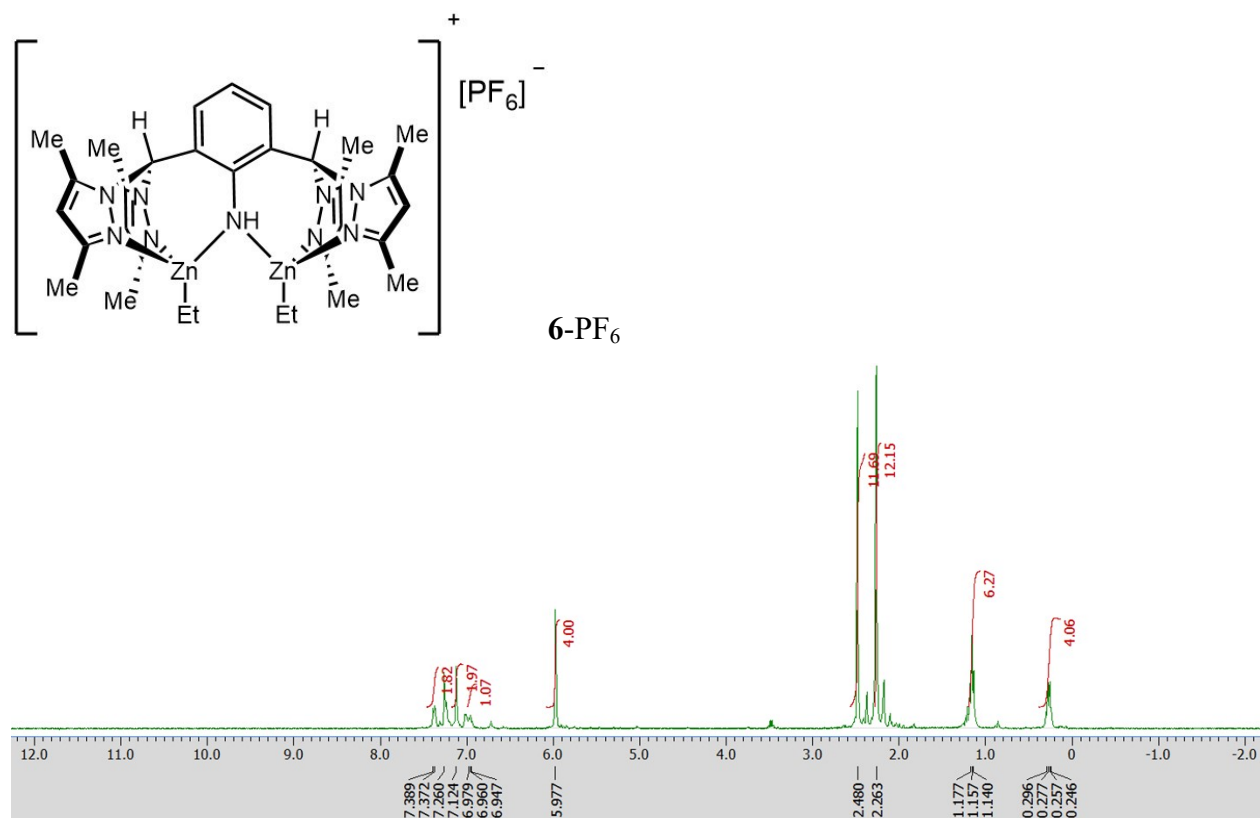

**Figure S31.** <sup>1</sup>H-NMR of **6-PF<sub>6</sub>**, CDCl<sub>3</sub>, 400 MHz.

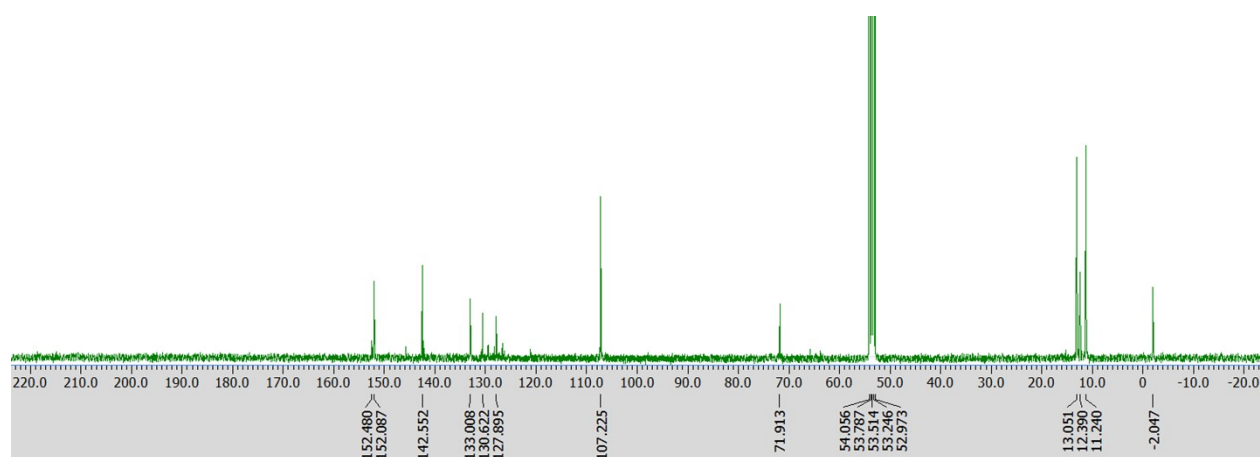

**Figure S32.** <sup>13</sup>C-NMR of **6-PF<sub>6</sub>**, CD<sub>2</sub>Cl<sub>2</sub>, 101 MHz.

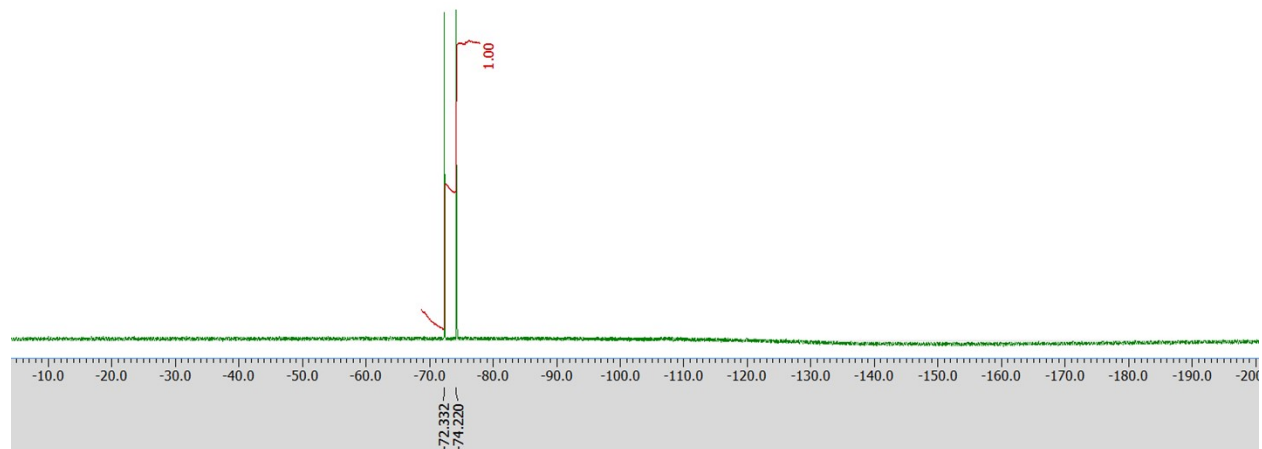

**Figure S33.**  $^{19}\text{F}$ -NMR of **6**-PF<sub>6</sub>, CDCl<sub>3</sub>, 376 MHz.

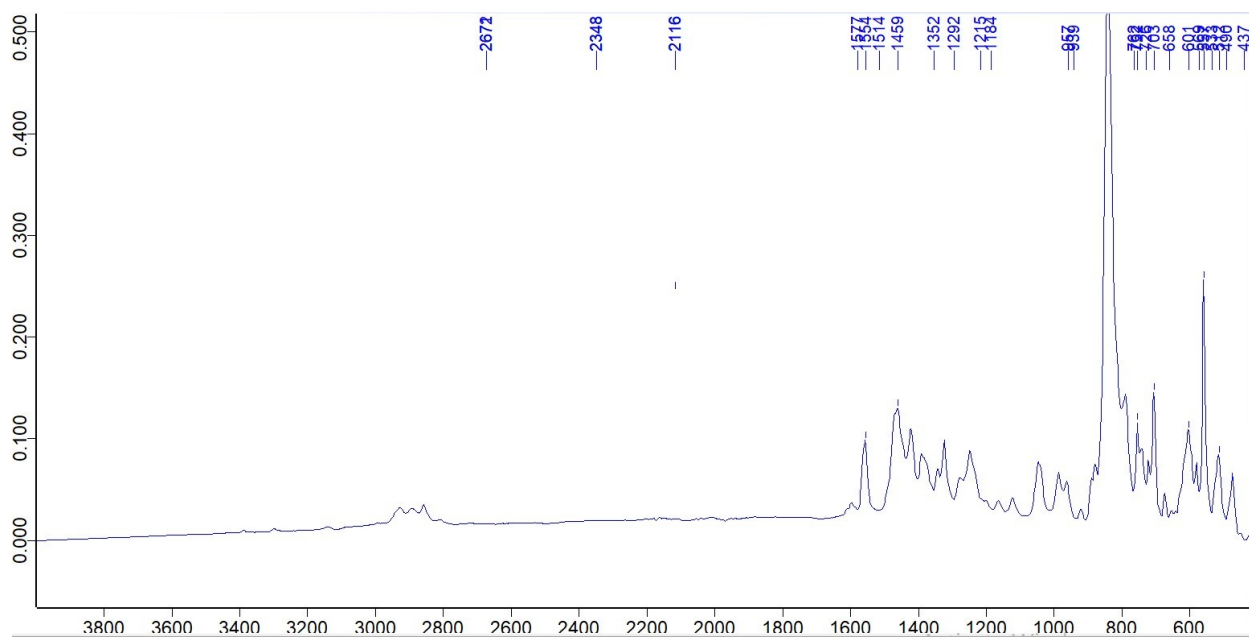

**Figure S34.** Infrared spectrum of **6**-PF<sub>6</sub>, diamond ATR.

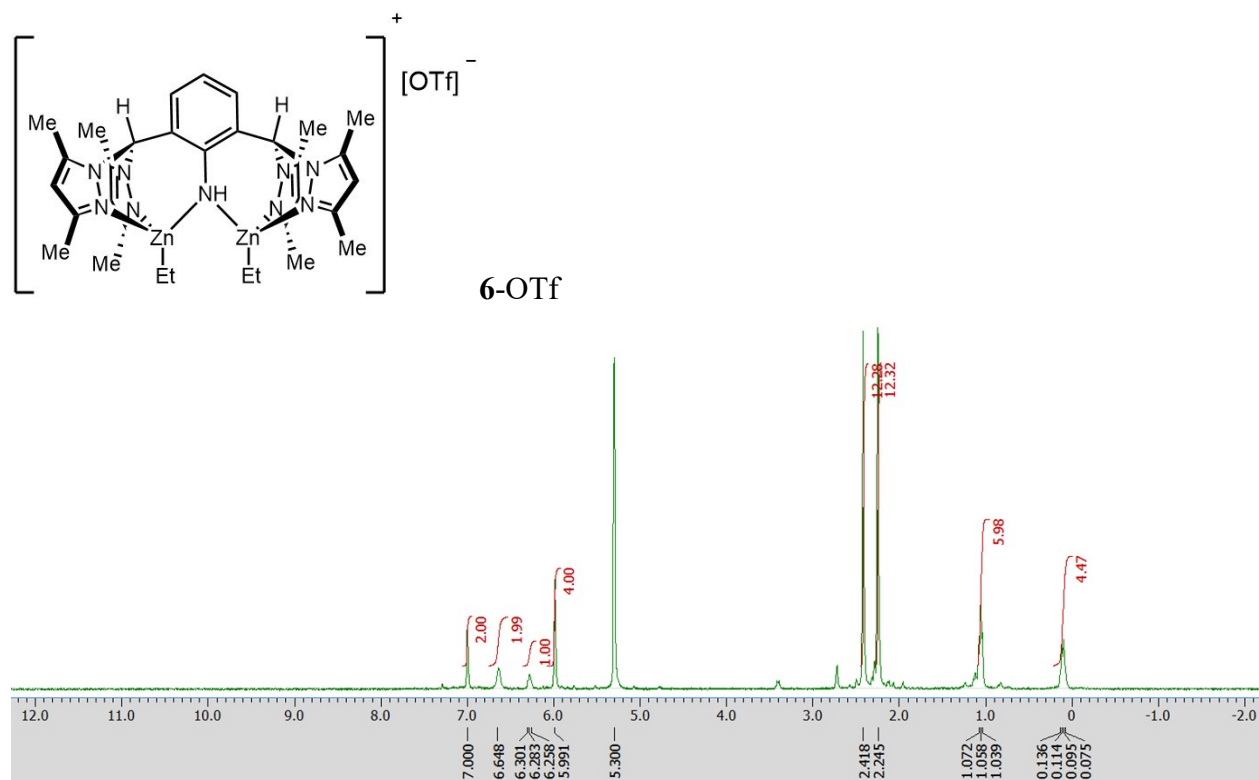

**Figure S35.**  $^1\text{H-NMR}$  of **6-OTf**,  $\text{CD}_2\text{Cl}_2$ , 400 MHz.

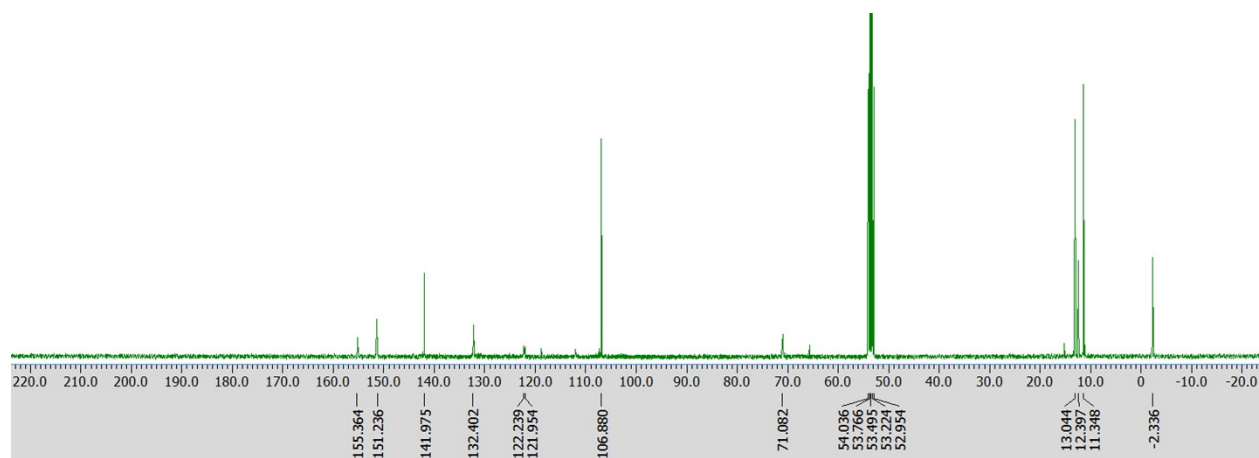

**Figure S36.**  $^{13}\text{C-NMR}$  of **6-OTf**,  $\text{CD}_2\text{Cl}_2$ , 101 MHz.

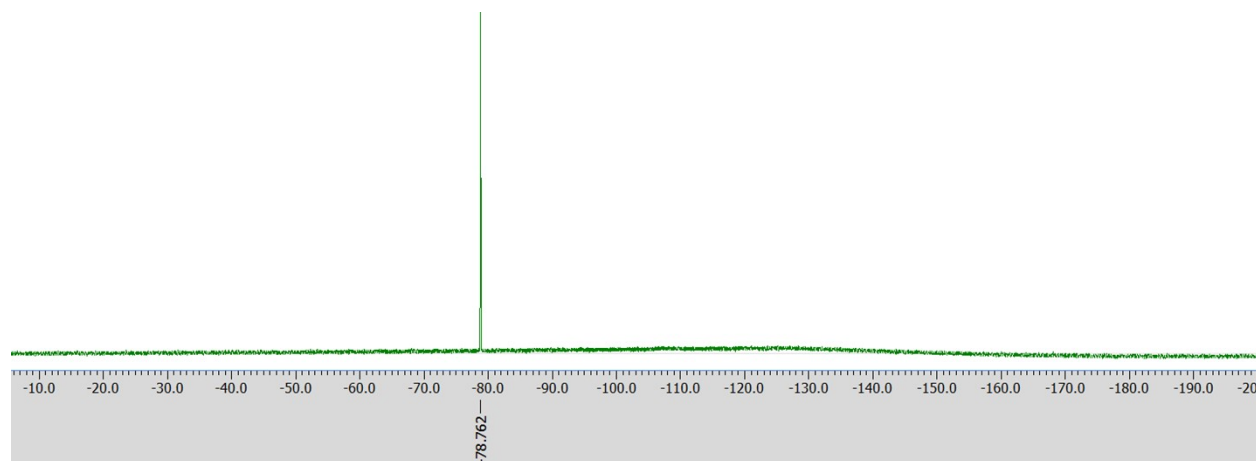

**Figure S37.**  $^{19}\text{F}$ -NMR of **6-OTf**,  $\text{CD}_2\text{Cl}_2$ , 376 MHz.

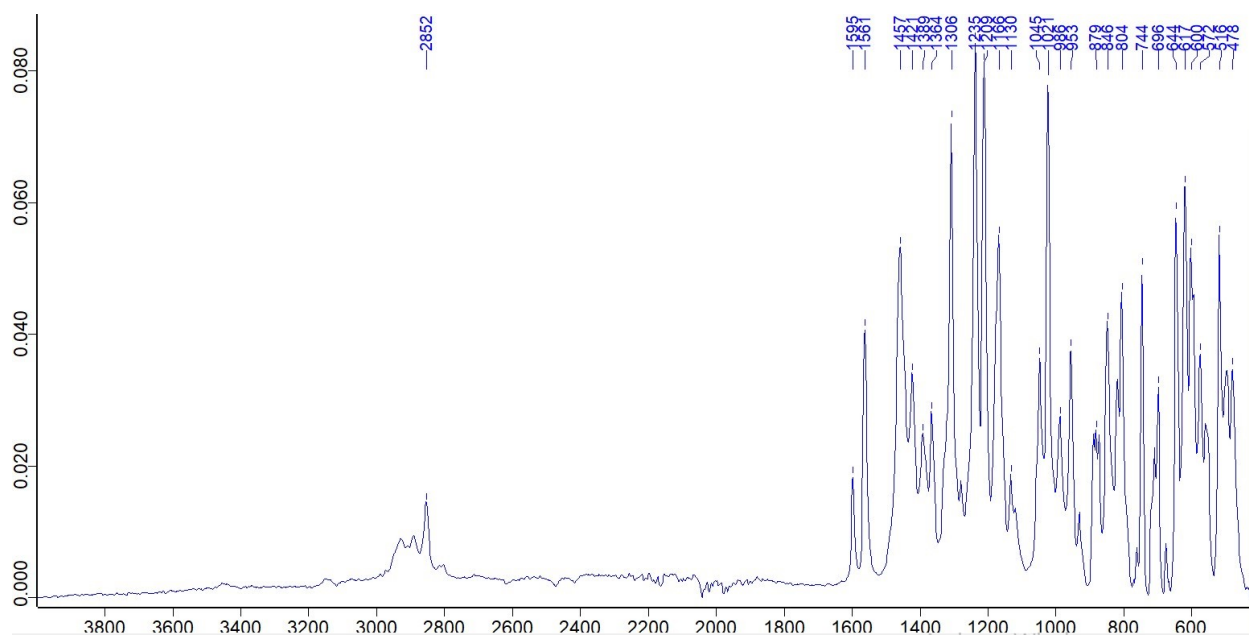

**Figure S38.** Infrared spectrum of **6-OTf**, diamond ATR.

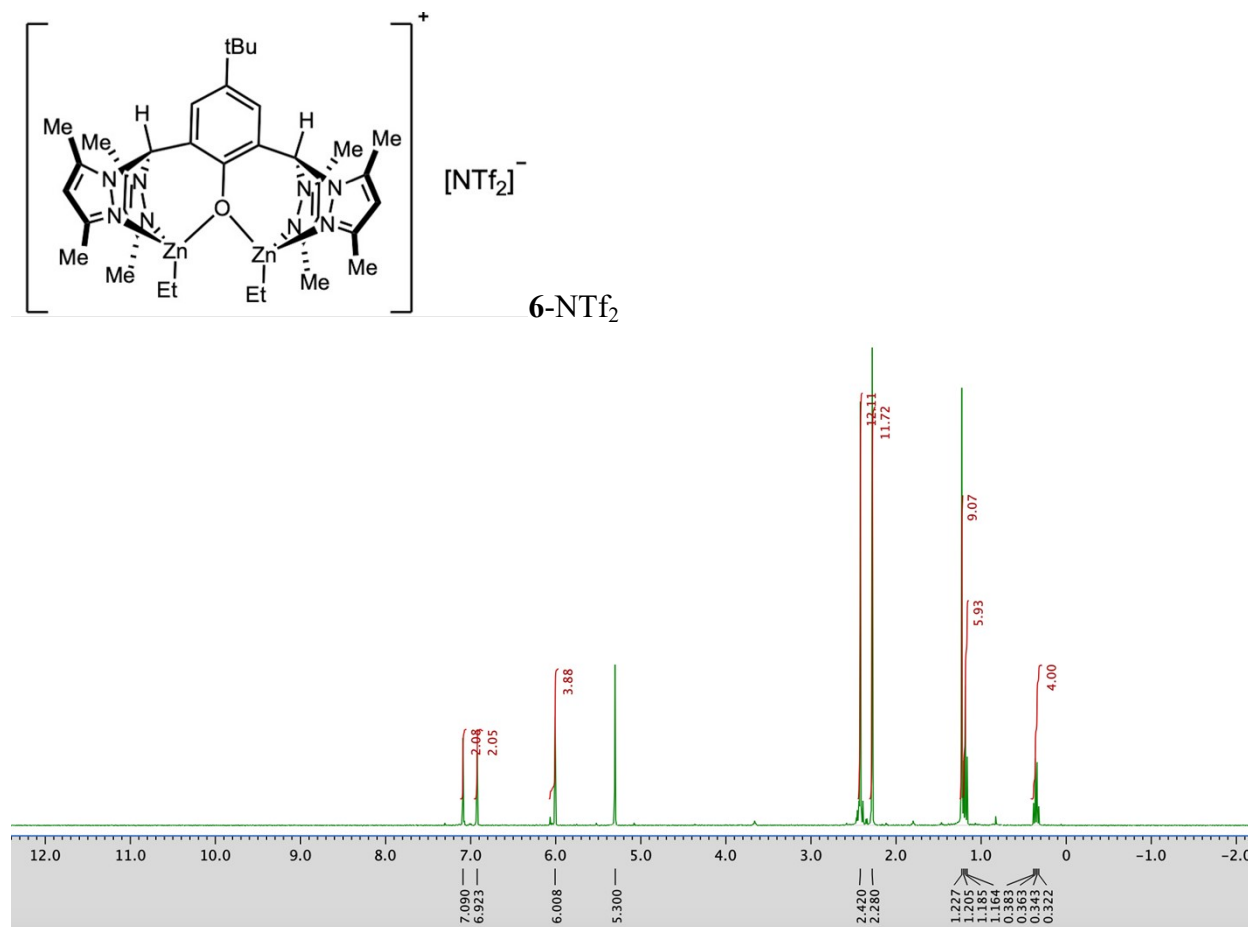

**Figure S39.** <sup>1</sup>H-NMR of **6-NTf<sub>2</sub>**, CD<sub>2</sub>Cl<sub>2</sub>, 400 MHz.

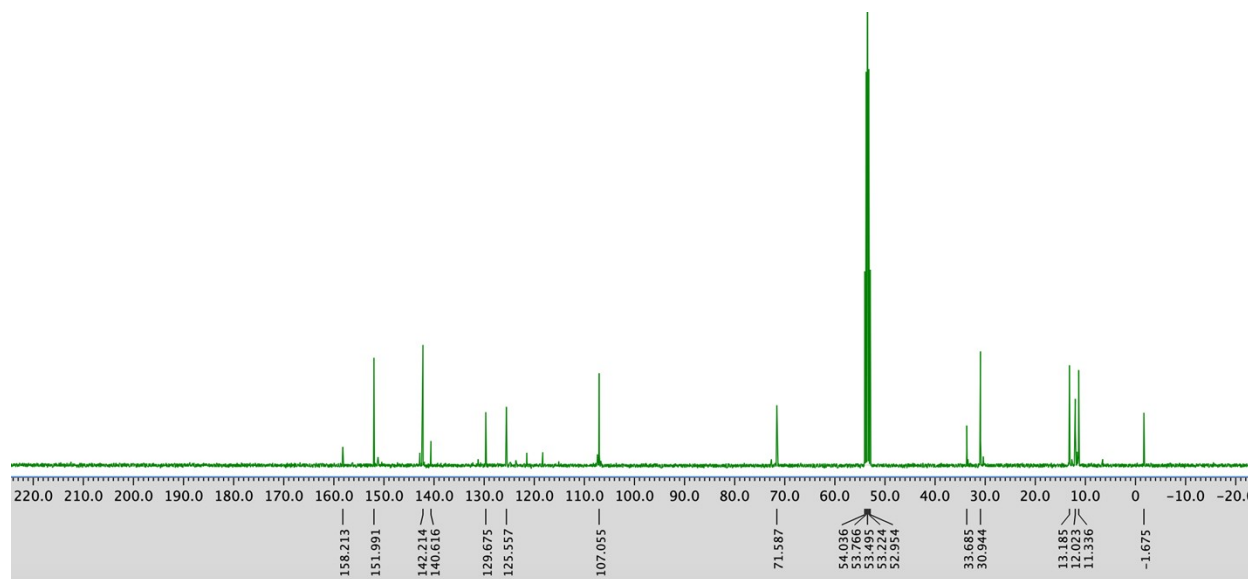

**Figure S40.** <sup>13</sup>C-NMR of **6-NTf<sub>2</sub>**, CD<sub>2</sub>Cl<sub>2</sub>, 101 MHz.

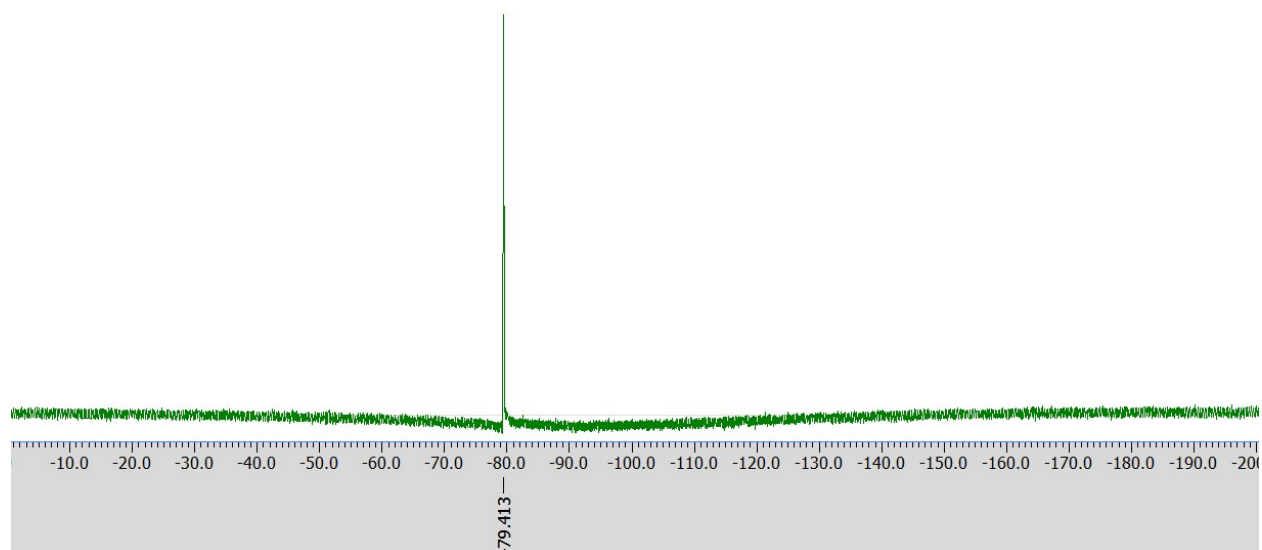

**Figure S41.**  $^{19}\text{F}$ -NMR of **6-NTf<sub>2</sub>**,  $\text{CD}_2\text{Cl}_2$ , 376 MHz.

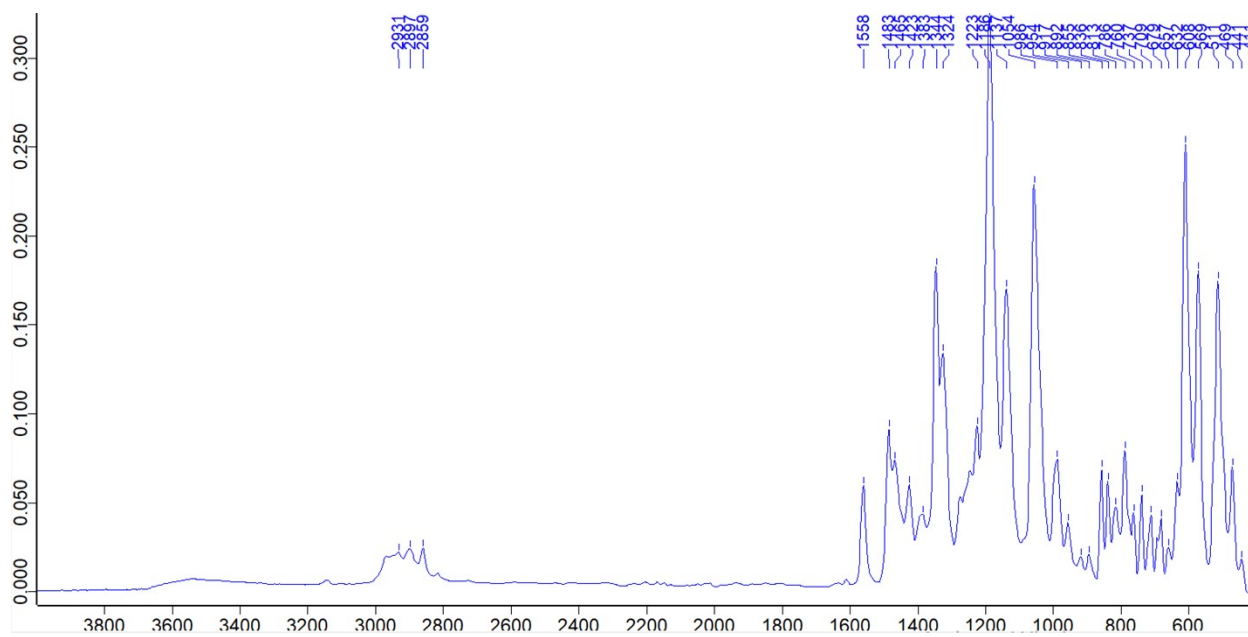

**Figure S42.** Infrared spectrum of **6-NTf<sub>2</sub>**, diamond ATR.



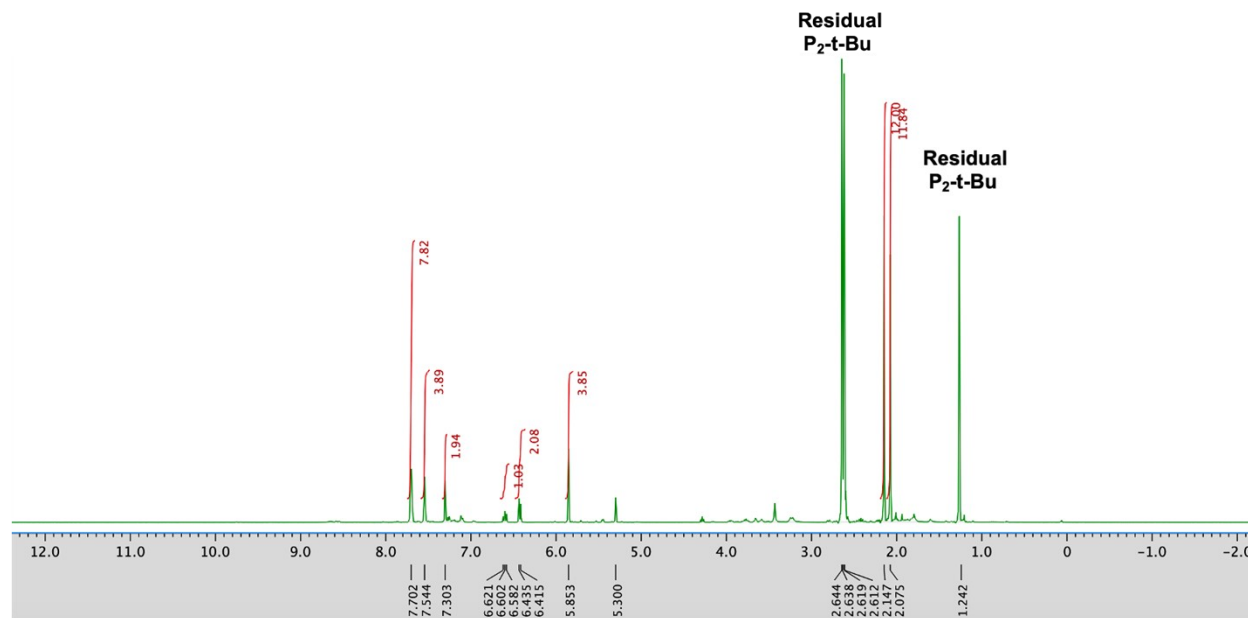

**Figure S43.** Crude <sup>1</sup>H-NMR of the reaction between 1-Ethyl-2,2,4,4,4-pentakis(dimethylamino)-2λ<sup>5</sup>,4λ<sup>5</sup>-catenadi(phosphazene) and [AD<sup>Me</sup>HZn<sub>2</sub>Et<sub>2</sub>][B(C<sub>8</sub>H<sub>3</sub>F<sub>6</sub>)<sub>4</sub>], CD<sub>2</sub>Cl<sub>2</sub>, 400 MHz),

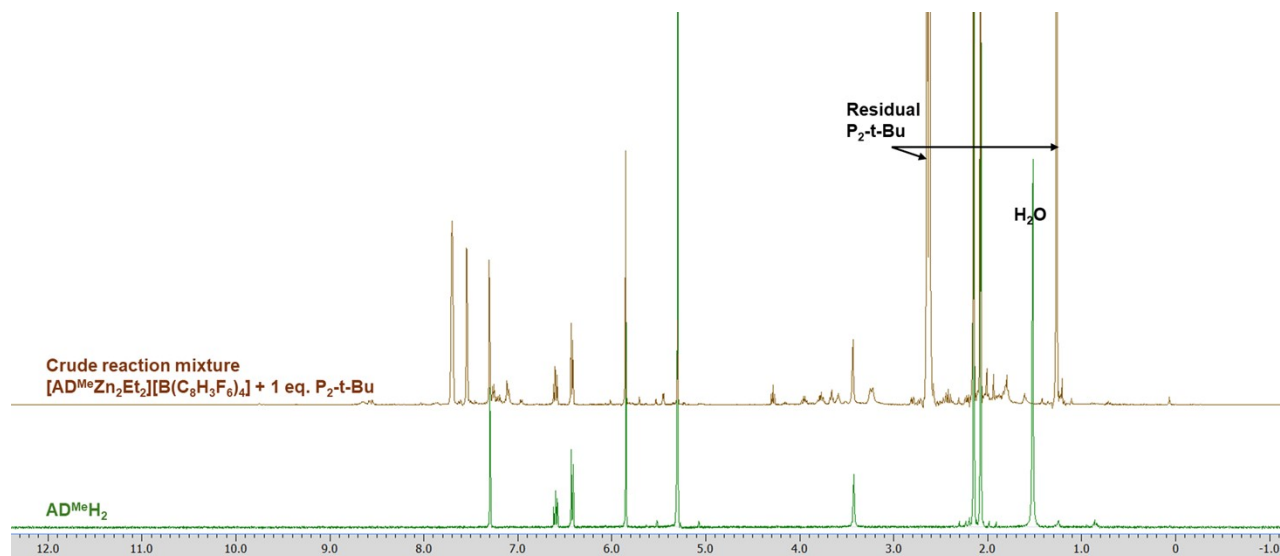

**Figure S44.** Stacked <sup>1</sup>H-NMR of the reaction between 1-Ethyl-2,2,4,4,4-pentakis(dimethylamino)-2λ<sup>5</sup>,4λ<sup>5</sup>-catenadi(phosphazene) and [AD<sup>Me</sup>HZn<sub>2</sub>Et<sub>2</sub>][B(C<sub>8</sub>H<sub>3</sub>F<sub>6</sub>)<sub>4</sub>] and AD<sup>Me</sup>H<sub>2</sub> **5**, CD<sub>2</sub>Cl<sub>2</sub>, 400 MHz),

### S6. X-ray diffraction analysis of 6-BArF.

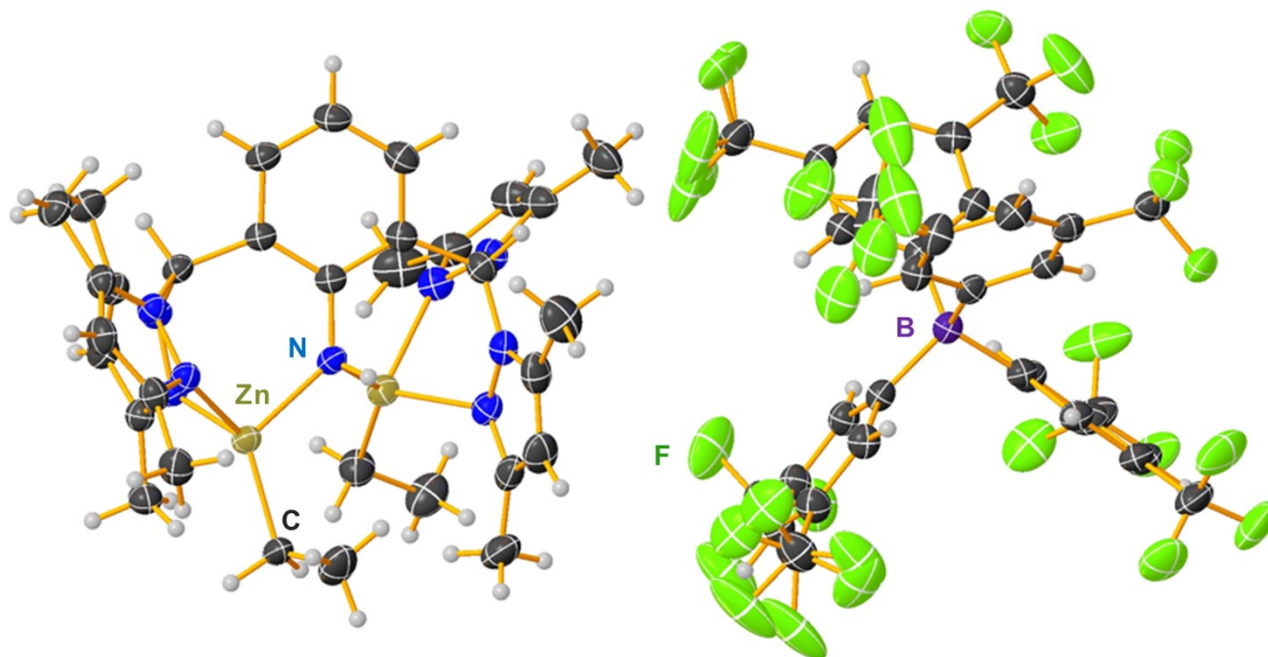

**Figure S45.** X-ray structure of  $\text{AD}^{\text{Me}}\text{HZn}_2\text{Et}_2\text{B}(\text{C}_8\text{H}_3\text{F}_6)_4$ . Thermal ellipsoids are 50% equiprobability envelopes.

**Table S2.** Crystal data and structure refinement for  $[\text{AD}^{\text{Me}}\text{HZn}_2\text{Et}_2][\text{B}(\text{C}_8\text{H}_3\text{F}_6)_4]$  6-BArF.

|                       |                                                                            |
|-----------------------|----------------------------------------------------------------------------|
| Identification code   | PN2-022_XW399_sq                                                           |
| Empirical formula     | $\text{C}_{65}\text{H}_{58}\text{BCl}_2\text{F}_{24}\text{N}_9\text{Zn}_2$ |
| Formula weight        | 1633.65                                                                    |
| Temperature/K         | 123(2)                                                                     |
| Crystal system        | triclinic                                                                  |
| Space group           | P-1                                                                        |
| a/Å                   | 13.2518(3)                                                                 |
| b/Å                   | 13.6360(3)                                                                 |
| c/Å                   | 21.3029(4)                                                                 |
| $\alpha/^\circ$       | 77.1250(10)                                                                |
| $\beta/^\circ$        | 76.3660(10)                                                                |
| $\gamma/^\circ$       | 85.9300(10)                                                                |
| Volume/Å <sup>3</sup> | 3646.25(14)                                                                |
| Z                     | 2                                                                          |

|                                                |                                                                |
|------------------------------------------------|----------------------------------------------------------------|
| $\rho_{\text{calc}}/\text{cm}^3$               | 1.488                                                          |
| $\mu/\text{mm}^{-1}$                           | 2.440                                                          |
| F(000)                                         | 1652.0                                                         |
| Crystal size/ $\text{mm}^3$                    | $0.19 \times 0.16 \times 0.02$                                 |
| Radiation                                      | CuK $\alpha$ ( $\lambda = 1.54178$ )                           |
| 2 $\Theta$ range for data collection/ $^\circ$ | 6.65 to 132.064                                                |
| Index ranges                                   | $-15 \leq h \leq 15, -16 \leq k \leq 16, -25 \leq l \leq 25$   |
| Reflections collected                          | 59186                                                          |
| Independent reflections                        | 12262 [ $R_{\text{int}} = 0.0241, R_{\text{sigma}} = 0.0182$ ] |
| Data/restraints/parameters                     | 12262/598/986                                                  |
| Goodness-of-fit on $F^2$                       | 1.027                                                          |
| Final R indexes [ $I \geq 2\sigma(I)$ ]        | $R_1 = 0.0371, wR_2 = 0.0970$                                  |
| Final R indexes [all data]                     | $R_1 = 0.0388, wR_2 = 0.0984$                                  |
| Largest diff. peak/hole / $e \text{ \AA}^{-3}$ | 0.72/-0.66                                                     |

**Table S3.** Fractional Atomic Coordinates ( $\times 10^4$ ) and Equivalent Isotropic Displacement Parameters ( $\text{\AA}^2 \times 10^3$ ) for  $[\text{AD}^{\text{M}^{\text{c}}}\text{HZn}_2\text{Et}_2][\text{B}(\text{C}_8\text{H}_3\text{F}_6)_4]$  **6**-BARF.  $U_{\text{eq}}$  is defined as 1/3 of the trace of the orthogonalised  $U_{ij}$  tensor.

| Atom | <i>x</i>    | <i>y</i>     | <i>z</i>    | $U(\text{eq})$ |
|------|-------------|--------------|-------------|----------------|
| Zn1  | 10579.2 (2) | 4566.5 (2)   | 1517.3 (2)  | 27.85 (8)      |
| Zn2  | 11212.4 (2) | 4998.5 (2)   | 2860.1 (2)  | 30.51 (8)      |
| Cl1  | 7272.0 (6)  | 4573.7 (5)   | 2411.8 (4)  | 58.07 (17)     |
| Cl2  | 7155.5 (7)  | 2427.8 (6)   | 2531.8 (5)  | 81.5 (3)       |
| F1   | 404.3 (11)  | -708.2 (11)  | 9015.3 (7)  | 49.5 (3)       |
| F2   | 1861.5 (12) | -1311.1 (10) | 9222.6 (7)  | 49.2 (4)       |
| F3   | 8858.2 (13) | -132 (2)     | 5119.0 (11) | 89.0 (7)       |
| F4   | 8699.3 (12) | 340.7 (14)   | 6018.8 (8)  | 61.2 (4)       |
| F10  | 1447.4 (11) | 233.7 (10)   | 9234.7 (7)  | 44.1 (3)       |
| F11  | 4735.5 (13) | 4292.9 (11)  | 8265.6 (8)  | 56.2 (4)       |
| F13  | 8093.0 (14) | -665.7 (13)  | 8962.8 (9)  | 65.5 (5)       |
| F14  | 5335.0 (16) | -3547.4 (11) | 8525.3 (9)  | 68.8 (5)       |
| F16  | 8237.3 (14) | 1346.2 (15)  | 5227.7 (10) | 83.6 (6)       |
| F17  | 3800.1 (16) | 3020.4 (17)  | 8764.2 (9)  | 86.9 (7)       |
| F18  | 5437.3 (17) | 2913.7 (14)  | 8649.8 (9)  | 73.6 (5)       |
| F21  | 7386.2 (16) | 790.7 (13)   | 8689.0 (12) | 82.4 (7)       |
| F22  | 8438.7 (13) | 151.7 (14)   | 7958.3 (11) | 72.8 (5)       |
| F23  | 4158.6 (14) | -2877.1 (13) | 9164.4 (11) | 85.1 (7)       |
| F24  | 5624.2 (17) | -3310.7 (12) | 9421.2 (9)  | 74.0 (5)       |
| N1   | 9386.6 (14) | 5095.1 (13)  | 1032.0 (8)  | 29.4 (4)       |

**Table S3.** Fractional Atomic Coordinates ( $\times 10^4$ ) and Equivalent Isotropic Displacement Parameters ( $\text{\AA}^2 \times 10^3$ ) for  $[\text{AD}^{\text{Mc}}\text{HZn}_2\text{Et}_2][\text{B}(\text{C}_8\text{H}_3\text{F}_6)_4]$  **6**-BARF.  $U_{\text{eq}}$  is defined as 1/3 of the trace of the orthogonalised  $U_{ij}$  tensor.

| Atom | <i>x</i>     | <i>y</i>     | <i>z</i>    | <i>U</i> (eq) |
|------|--------------|--------------|-------------|---------------|
| N2   | 9214.3 (13)  | 6111.9 (13)  | 900.1 (8)   | 27.9 (4)      |
| N3   | 10006.0 (14) | 5033.5 (13)  | 2381.6 (8)  | 27.0 (3)      |
| N4   | 10625.6 (14) | 5979.6 (14)  | 3508.6 (9)  | 34.1 (4)      |
| N5   | 9720.6 (14)  | 5700.6 (14)  | 3965.2 (9)  | 32.1 (4)      |
| N6   | 10734.6 (13) | 6769.6 (12)  | 1074.3 (8)  | 27.5 (4)      |
| N7   | 11333.3 (13) | 5910.8 (13)  | 1074.0 (8)  | 28.2 (4)      |
| N8   | 10297.3 (14) | 3858.8 (13)  | 3611.0 (9)  | 32.5 (4)      |
| N9   | 9273.1 (14)  | 4129.6 (14)  | 3800.4 (8)  | 31.9 (4)      |
| C2   | 7666 (2)     | -84 (2)      | 8498.4 (16) | 54.1 (7)      |
| C3   | 1410.4 (17)  | -500.9 (16)  | 8906.8 (11) | 35.5 (5)      |
| C4   | 4687 (2)     | 3300.7 (19)  | 8339.5 (13) | 43.5 (6)      |
| C5   | 6503 (3)     | 3583 (3)     | 2434 (3)    | 85.7 (12)     |
| C6   | 5181 (2)     | -2893.7 (19) | 8920.4 (14) | 49.0 (6)      |
| C7   | 5125 (2)     | 4032.4 (18)  | 5890.4 (12) | 43.4 (5)      |
| F1C  | 4750 (3)     | 4956.8 (18)  | 5970.0 (12) | 65.4 (9)      |
| F2C  | 4651 (4)     | 3769 (3)     | 5486.0 (17) | 93.2 (14)     |
| F3C  | 6106 (3)     | 4193 (4)     | 5593 (2)    | 77.5 (13)     |
| F4C  | 5201 (16)    | 3591 (12)    | 5371 (7)    | 93.2 (14)     |
| F5C  | 6028 (11)    | 4481 (16)    | 5655 (9)    | 76 (5)        |
| F6C  | 4383 (10)    | 4673 (9)     | 5821 (6)    | 65.4 (9)      |
| C8   | 8579.7 (16)  | 6388.6 (17)  | 471.4 (10)  | 31.5 (4)      |
| C9   | 8347.7 (18)  | 5515.9 (18)  | 322.4 (10)  | 35.4 (5)      |
| C10  | 8858.4 (17)  | 4732.1 (16)  | 674.8 (10)  | 31.2 (4)      |
| C11  | 9582.8 (19)  | 6168.9 (19)  | 4481.8 (12) | 40.3 (5)      |
| C12  | 10438 (2)    | 6740 (2)     | 4361.8 (14) | 48.6 (6)      |
| C13  | 11067.7 (19) | 6612.2 (18)  | 3754.5 (13) | 42.8 (6)      |
| C14  | 9601.3 (16)  | 6753.1 (15)  | 1251.9 (10) | 27.7 (4)      |
| C15  | 12310.6 (16) | 6212.5 (16)  | 836.0 (10)  | 29.2 (4)      |
| C16  | 12335.1 (17) | 7266.4 (16)  | 675.9 (11)  | 32.7 (5)      |
| C17  | 11327.0 (17) | 7600.7 (15)  | 825.2 (10)  | 30.1 (4)      |
| C18  | 8282.2 (19)  | 7455.3 (18)  | 225.9 (12)  | 40.1 (5)      |
| C19  | 8869 (2)     | 3631.9 (17)  | 691.3 (12)  | 39.5 (5)      |
| C20  | 11189.4 (18) | 3178.5 (15)  | 1575.4 (10) | 33.5 (5)      |
| C21  | 10430 (3)    | 2358.2 (19)  | 1977.0 (14) | 53.2 (7)      |
| C22  | 9263.5 (15)  | 5809.9 (15)  | 2496.7 (10) | 26.0 (4)      |

**Table S3.** Fractional Atomic Coordinates ( $\times 10^4$ ) and Equivalent Isotropic Displacement Parameters ( $\text{\AA}^2 \times 10^3$ ) for  $[\text{AD}^{\text{Mc}}\text{HZn}_2\text{Et}_2][\text{B}(\text{C}_8\text{H}_3\text{F}_6)_4]$  **6**-BARF.  $U_{\text{eq}}$  is defined as 1/3 of the trace of the orthogonalised  $U_{\text{ij}}$  tensor.

| Atom | <i>x</i>     | <i>y</i>     | <i>z</i>    | $U_{\text{eq}}$ |
|------|--------------|--------------|-------------|-----------------|
| C23  | 9066.5 (15)  | 6596.3 (15)  | 1984.6 (10) | 26.3 (4)        |
| C24  | 8283.1 (16)  | 7309.5 (16)  | 2122.2 (11) | 31.5 (4)        |
| C25  | 7676.9 (17)  | 7266.0 (17)  | 2750.2 (11) | 35.4 (5)        |
| C26  | 7892.4 (16)  | 6526.0 (17)  | 3261.3 (11) | 33.3 (5)        |
| C27  | 8687.9 (16)  | 5820.3 (16)  | 3146.9 (10) | 28.4 (4)        |
| C28  | 12722.8 (18) | 4776 (2)     | 2594.8 (12) | 41.8 (5)        |
| C29  | 13238 (2)    | 4359 (2)     | 3174.4 (15) | 52.7 (7)        |
| C30  | 10302.7 (19) | 2865.9 (17)  | 3650.7 (11) | 37.5 (5)        |
| C31  | 9290 (2)     | 2514.0 (18)  | 3863.0 (12) | 46.4 (6)        |
| C32  | 8644 (2)     | 3327.5 (18)  | 3956.3 (11) | 40.8 (5)        |
| C33  | 8951.0 (17)  | 5182.4 (16)  | 3778.7 (10) | 31.0 (4)        |
| C34  | 8638 (2)     | 6028 (2)     | 5037.3 (13) | 52.0 (7)        |
| C35  | 12076 (2)    | 7087 (2)     | 3380.4 (17) | 58.8 (7)        |
| C36  | 13186.0 (17) | 5463.7 (17)  | 763.6 (11)  | 34.7 (5)        |
| C37  | 10861.3 (18) | 8638.0 (16)  | 755.6 (12)  | 36.9 (5)        |
| C38  | 11297 (2)    | 2297.5 (19)  | 3480.1 (14) | 49.0 (6)        |
| C39  | 7500 (2)     | 3407 (2)     | 4188.3 (15) | 57.0 (7)        |
| C40  | 3572.1 (16)  | 155.9 (14)   | 7376.6 (10) | 27.9 (4)        |
| C41  | 2987.1 (17)  | 331.5 (17)   | 6894.7 (11) | 34.0 (5)        |
| C42  | 1915.2 (19)  | 245.3 (19)   | 7055.6 (12) | 40.8 (5)        |
| C43  | 1368.8 (18)  | -36.1 (17)   | 7708.4 (12) | 37.9 (5)        |
| C44  | 1931.9 (16)  | -204.1 (15)  | 8192.9 (11) | 30.7 (4)        |
| C45  | 3003.7 (16)  | -95.3 (15)   | 8030.8 (10) | 28.8 (4)        |
| C46  | 5472.6 (16)  | -0.8 (15)    | 6530.9 (10) | 29.8 (4)        |
| C47  | 5162.8 (17)  | -727.4 (17)  | 6247.9 (11) | 33.7 (5)        |
| C48  | 5822.1 (19)  | -1078.9 (18) | 5728.5 (11) | 38.0 (5)        |
| C49  | 6828.8 (18)  | -735.5 (18)  | 5476.9 (11) | 38.3 (5)        |
| C50  | 7154.0 (17)  | -24.1 (17)   | 5754.7 (11) | 35.4 (5)        |
| C51  | 6489.8 (17)  | 334.8 (16)   | 6261.7 (10) | 33.0 (5)        |
| C52A | 1247 (9)     | 629 (9)      | 6565 (6)    | 56.0 (14)       |
| F1A  | 345 (4)      | 1085 (6)     | 6764 (2)    | 93.6 (12)       |
| F2A  | 925 (6)      | -174 (4)     | 6405 (3)    | 73.4 (8)        |
| F3A  | 1690 (30)    | 1255 (17)    | 6009 (14)   | 70.8 (14)       |
| C52B | 1393 (5)     | 357 (6)      | 6484 (4)    | 56.0 (14)       |
| F4A  | 1787 (3)     | -244 (2)     | 6057.6 (15) | 73.4 (8)        |

**Table S3.** Fractional Atomic Coordinates ( $\times 10^4$ ) and Equivalent Isotropic Displacement Parameters ( $\text{\AA}^2 \times 10^3$ ) for  $[\text{AD}^{\text{Me}}\text{HZn}_2\text{Et}_2][\text{B}(\text{C}_8\text{H}_3\text{F}_6)_4]$  **6**-BARF.  $U_{\text{eq}}$  is defined as 1/3 of the trace of the orthogonalised  $U_{ij}$  tensor.

| Atom | x           | y            | z           | U(eq)      |
|------|-------------|--------------|-------------|------------|
| F5A  | 1575 (16)   | 1264 (10)    | 6097 (8)    | 70.8 (14)  |
| F6A  | 412 (2)     | 117 (4)      | 6678.4 (17) | 93.6 (12)  |
| C53  | 4918.7 (15) | 1553.0 (15)  | 7153.0 (10) | 27.9 (4)   |
| C54  | 4794.8 (16) | 1938.6 (16)  | 7723.6 (10) | 29.9 (4)   |
| C55  | 4796.5 (16) | 2962.8 (17)  | 7705.0 (11) | 32.7 (5)   |
| C56  | 4901.6 (17) | 3656.7 (16)  | 7110.7 (11) | 34.7 (5)   |
| C57  | 5009.7 (17) | 3297.9 (16)  | 6537.0 (11) | 33.6 (5)   |
| C58  | 5025.3 (16) | 2268.0 (16)  | 6558.1 (10) | 30.8 (4)   |
| C59  | 5380.8 (16) | -318.6 (15)  | 7774.6 (10) | 29.1 (4)   |
| C60  | 6248.0 (17) | 29.5 (16)    | 7917.4 (11) | 32.9 (5)   |
| C61  | 6773.2 (18) | -550.1 (18)  | 8369.5 (12) | 38.4 (5)   |
| C62  | 6445.4 (19) | -1505.6 (18) | 8705.1 (12) | 41.2 (5)   |
| C63  | 5590.0 (18) | -1871.4 (17) | 8569.4 (11) | 37.0 (5)   |
| C64  | 5078.3 (17) | -1297.7 (16) | 8108.2 (11) | 32.2 (4)   |
| C65  | 5446 (2)    | -1847 (2)    | 5440.9 (13) | 49.7 (6)   |
| F1B  | 4836 (11)   | -2497 (11)   | 5883 (7)    | 79 (4)     |
| F2B  | 6233 (7)    | -2522 (9)    | 5297 (6)    | 105.7 (16) |
| F3B  | 5120 (8)    | -1479 (7)    | 4947 (5)    | 73.5 (10)  |
| F4B  | 6110 (3)    | -2073 (4)    | 4915 (2)    | 105.7 (16) |
| F5B  | 4555 (3)    | -1527 (2)    | 5213.3 (19) | 73.5 (10)  |
| F6B  | 5133 (5)    | -2663 (4)    | 5866 (3)    | 83.5 (19)  |
| C66  | 8238 (2)    | 375 (2)      | 5522.7 (12) | 47.0 (6)   |
| B1   | 4823.3 (18) | 344.0 (18)   | 7202.7 (11) | 28.8 (5)   |

**Table S4.** Anisotropic Displacement Parameters ( $\text{\AA}^2 \times 10^3$ ) for  $[\text{AD}^{\text{Me}}\text{HZn}_2\text{Et}_2][\text{B}(\text{C}_8\text{H}_3\text{F}_6)_4]$  **6**-BARF. The Anisotropic displacement factor exponent takes the form: -  $2\pi^2[h^2a^*2U_{11}+2hka^*b^*U_{12}+\dots]$ .

| Atom | $U_{11}$   | $U_{22}$   | $U_{33}$   | $U_{23}$   | $U_{13}$    | $U_{12}$  |
|------|------------|------------|------------|------------|-------------|-----------|
| Zn1  | 33.17 (15) | 23.19 (14) | 28.31 (14) | -5.95 (10) | -9.37 (11)  | 1.77 (11) |
| Zn2  | 28.72 (15) | 31.32 (15) | 33.15 (15) | -6.52 (11) | -10.84 (11) | 0.40 (11) |
| Cl1  | 54.8 (4)   | 46.0 (3)   | 78.7 (5)   | -18.4 (3)  | -18.2 (3)   | -9.1 (3)  |
| Cl2  | 79.9 (6)   | 44.2 (4)   | 116.4 (7)  | -26.8 (4)  | -3.3 (5)    | -7.9 (4)  |
| F1   | 34.7 (7)   | 54.9 (9)   | 53.0 (8)   | -7.6 (7)   | 1.7 (6)     | -13.0 (6) |
| F2   | 56.1 (9)   | 37.0 (7)   | 41.2 (7)   | 5.3 (6)    | -0.6 (6)    | 9.0 (6)   |

**Table S4.** Anisotropic Displacement Parameters ( $\text{\AA}^2 \times 10^3$ ) for  $[\text{AD}^{\text{Me}}\text{HZn}_2\text{Et}_2][\text{B}(\text{C}_8\text{H}_3\text{F}_6)_4]$  6-  
 BARF. The Anisotropic displacement factor exponent takes the form: -  
 $2\pi^2[\text{h}^2\text{a}^2\text{U}_{11}+2\text{hka}*\text{b}*\text{U}_{12}+\dots]$ .

| Atom | $U_{11}$   | $U_{22}$   | $U_{33}$   | $U_{23}$   | $U_{13}$   | $U_{12}$   |
|------|------------|------------|------------|------------|------------|------------|
| F3   | 39.4 (9)   | 149 (2)    | 89.7 (14)  | -72.0 (14) | 14.2 (9)   | -23.0 (11) |
| F4   | 43.3 (8)   | 82.5 (12)  | 60.8 (10)  | -10.8 (8)  | -17.0 (7)  | -18.6 (8)  |
| F10  | 49.7 (8)   | 39.4 (7)   | 41.3 (7)   | -11.8 (6)  | -2.8 (6)   | -3.1 (6)   |
| F11  | 73.9 (11)  | 41.6 (8)   | 62.6 (10)  | -26.3 (7)  | -20.0 (8)  | 0.7 (7)    |
| F13  | 66.5 (10)  | 57.9 (10)  | 90.1 (12)  | -14.4 (9)  | -58.0 (10) | 11.6 (8)   |
| F14  | 93.7 (13)  | 32.7 (8)   | 81.6 (12)  | -8.0 (8)   | -26.2 (10) | -3.7 (8)   |
| F16  | 60.8 (11)  | 78.6 (13)  | 89.7 (14)  | 34.2 (11)  | -14.3 (10) | -33.1 (10) |
| F17  | 85.1 (13)  | 112.0 (16) | 64.6 (11)  | -53.7 (11) | 28.1 (10)  | -50.0 (12) |
| F18  | 107.8 (15) | 68.2 (11)  | 69.0 (11)  | -34.7 (9)  | -56.2 (11) | 25.8 (10)  |
| F21  | 84.6 (13)  | 55.8 (10)  | 144.8 (19) | -49.0 (11) | -81.4 (13) | 23.7 (9)   |
| F22  | 46.7 (9)   | 72.8 (12)  | 101.1 (14) | -2.1 (10)  | -33.6 (10) | -12.1 (9)  |
| F23  | 55.7 (10)  | 51.3 (10)  | 109.2 (15) | 30.8 (10)  | 10.9 (10)  | 4.9 (8)    |
| F24  | 107.4 (15) | 43.1 (9)   | 68.5 (11)  | 13.8 (8)   | -40.3 (10) | 4.9 (9)    |
| N1   | 34.9 (9)   | 25.7 (9)   | 29.1 (9)   | -5.5 (7)   | -10.4 (7)  | -1.7 (7)   |
| N2   | 30.8 (9)   | 26.7 (8)   | 27.9 (8)   | -4.9 (7)   | -10.8 (7)  | -0.7 (7)   |
| N3   | 30.4 (9)   | 22.7 (8)   | 29.0 (9)   | -4.7 (7)   | -9.9 (7)   | 0.5 (7)    |
| N4   | 33.5 (10)  | 34.0 (10)  | 40.0 (10)  | -11.4 (8)  | -14.6 (8)  | -2.0 (8)   |
| N5   | 33.3 (9)   | 37.0 (10)  | 31.0 (9)   | -12.1 (7)  | -12.9 (7)  | 0.2 (8)    |
| N6   | 28.9 (9)   | 24.1 (8)   | 30.3 (9)   | -4.4 (7)   | -10.0 (7)  | 1.2 (7)    |
| N7   | 29.7 (9)   | 26.0 (8)   | 30.0 (9)   | -5.9 (7)   | -10.0 (7)  | 3.6 (7)    |
| N8   | 35.3 (10)  | 31.6 (9)   | 31.7 (9)   | -4.1 (7)   | -12.5 (7)  | -0.7 (8)   |
| N9   | 35.6 (10)  | 32.7 (9)   | 27.3 (9)   | -3.5 (7)   | -8.3 (7)   | -5.4 (8)   |
| C2   | 50.0 (16)  | 45.5 (15)  | 79 (2)     | -14.6 (14) | -40.3 (15) | 10.1 (13)  |
| C3   | 34.4 (12)  | 26.3 (10)  | 43.1 (12)  | -6.2 (9)   | -4.7 (9)   | -1.3 (9)   |
| C4   | 47.4 (14)  | 39.6 (13)  | 46.6 (14)  | -14.8 (11) | -10.3 (11) | -4.4 (11)  |
| C5   | 58 (2)     | 59 (2)     | 159 (4)    | -42 (2)    | -44 (2)    | -1.4 (16)  |
| C6   | 51.1 (15)  | 35.7 (13)  | 53.1 (15)  | 2.4 (11)   | -12.7 (12) | 11.1 (11)  |
| C7   | 50.4 (14)  | 31.5 (12)  | 44.4 (13)  | 0.4 (10)   | -10.6 (11) | -1.3 (10)  |
| F1C  | 101 (2)    | 31.1 (11)  | 53.1 (13)  | 3.5 (9)    | -10.2 (12) | 11.2 (12)  |
| F2C  | 169 (4)    | 60.3 (16)  | 65.5 (16)  | 24.5 (11)  | -78 (2)    | -48 (2)    |
| F3C  | 62.9 (16)  | 85 (3)     | 52.8 (18)  | 19.7 (16)  | 14.8 (15)  | 5.4 (15)   |
| F4C  | 169 (4)    | 60.3 (16)  | 65.5 (16)  | 24.5 (11)  | -78 (2)    | -48 (2)    |
| F5C  | 97 (7)     | 87 (11)    | 50 (7)     | 26 (6)     | -47 (7)    | -74 (8)    |
| F6C  | 101 (2)    | 31.1 (11)  | 53.1 (13)  | 3.5 (9)    | -10.2 (12) | 11.2 (12)  |
| C8   | 30.8 (11)  | 38.6 (12)  | 26.0 (10)  | -4.5 (9)   | -10.8 (8)  | 0.5 (9)    |

**Table S4.** Anisotropic Displacement Parameters ( $\text{\AA}^2 \times 10^3$ ) for  $[\text{AD}^{\text{Me}}\text{HZn}_2\text{Et}_2][\text{B}(\text{C}_8\text{H}_3\text{F}_6)_4]$  6-  
BARF. The Anisotropic displacement factor exponent takes the form: -  
 $2\pi^2[h^2a^*U_{11}+2hka^*b^*U_{12}+\dots]$ .

| Atom | $U_{11}$  | $U_{22}$  | $U_{33}$  | $U_{23}$   | $U_{13}$   | $U_{12}$   |
|------|-----------|-----------|-----------|------------|------------|------------|
| C9   | 37.2 (12) | 44.5 (13) | 28.6 (11) | -8.2 (9)   | -13.9 (9)  | -4.2 (10)  |
| C10  | 33.4 (11) | 35.7 (11) | 25.9 (10) | -8.0 (8)   | -6.4 (8)   | -5.9 (9)   |
| C11  | 45.8 (13) | 45.7 (13) | 39.2 (12) | -20.0 (10) | -22.3 (10) | 12.0 (11)  |
| C12  | 52.3 (15) | 50.6 (15) | 59.0 (16) | -30.3 (13) | -28.7 (13) | 7.2 (13)   |
| C13  | 42.2 (13) | 36.1 (12) | 60.0 (15) | -16.8 (11) | -25.6 (12) | 2.9 (10)   |
| C14  | 29.7 (10) | 24.6 (10) | 31.2 (10) | -5.6 (8)   | -12.1 (8)  | 1.4 (8)    |
| C15  | 30.8 (11) | 31.9 (11) | 26.5 (10) | -5.8 (8)   | -9.8 (8)   | -1.1 (9)   |
| C16  | 32.4 (11) | 30.5 (11) | 35.7 (11) | -4.7 (9)   | -10.1 (9)  | -4.6 (9)   |
| C17  | 36.0 (11) | 25.5 (10) | 30.7 (10) | -4.5 (8)   | -11.9 (9)  | -3.4 (9)   |
| C18  | 43.2 (13) | 41.3 (13) | 37.8 (12) | -4.0 (10)  | -19.1 (10) | 5.9 (10)   |
| C19  | 48.5 (14) | 36.9 (12) | 37.5 (12) | -11.8 (10) | -12.6 (10) | -7.4 (10)  |
| C20  | 45.1 (12) | 24.8 (10) | 30.0 (11) | -5.9 (8)   | -9.9 (9)   | 7.8 (9)    |
| C21  | 80 (2)    | 30.4 (12) | 50.4 (15) | -4.0 (11)  | -21.5 (14) | -3.6 (13)  |
| C22  | 25.3 (10) | 25.9 (10) | 30.8 (10) | -9.4 (8)   | -10.5 (8)  | -2.1 (8)   |
| C23  | 25.8 (10) | 25.9 (10) | 31.1 (10) | -9.0 (8)   | -11.0 (8)  | -0.6 (8)   |
| C24  | 32.4 (11) | 27.5 (10) | 39.1 (12) | -10.0 (9)  | -15.6 (9)  | 3.7 (9)    |
| C25  | 31.4 (11) | 37.2 (12) | 42.9 (12) | -16.9 (10) | -13.6 (9)  | 8.3 (9)    |
| C26  | 28.3 (10) | 40.9 (12) | 34.9 (11) | -16.0 (9)  | -8.0 (9)   | 0.0 (9)    |
| C27  | 27.6 (10) | 30.7 (10) | 30.5 (10) | -9.4 (8)   | -10.7 (8)  | -2.5 (8)   |
| C28  | 33.7 (12) | 48.1 (14) | 41.8 (13) | -6.0 (10)  | -9.3 (10)  | 1.4 (10)   |
| C29  | 37.0 (13) | 55.3 (16) | 65.2 (17) | 0.5 (13)   | -22.2 (12) | -3.2 (12)  |
| C30  | 52.6 (14) | 30.7 (11) | 29.7 (11) | -1.8 (9)   | -14.6 (10) | -0.8 (10)  |
| C31  | 62.4 (16) | 32.4 (12) | 41.8 (13) | -2.4 (10)  | -8.0 (12)  | -13.9 (12) |
| C32  | 48.7 (14) | 41.5 (13) | 30.3 (11) | -3.5 (9)   | -5.2 (10)  | -15.1 (11) |
| C33  | 31.0 (11) | 35.4 (11) | 28.4 (10) | -9.9 (9)   | -7.4 (8)   | -1.7 (9)   |
| C34  | 54.5 (16) | 71.5 (18) | 38.7 (13) | -27.1 (13) | -17.4 (11) | 13.4 (14)  |
| C35  | 46.0 (15) | 49.4 (16) | 91 (2)    | -24.9 (15) | -23.3 (15) | -8.2 (13)  |
| C36  | 31.3 (11) | 35.9 (11) | 36.8 (11) | -8.0 (9)   | -8.1 (9)   | 2.7 (9)    |
| C37  | 39.9 (12) | 27.6 (11) | 44.8 (13) | -5.8 (9)   | -14.2 (10) | -0.9 (9)   |
| C38  | 63.1 (17) | 32.5 (12) | 53.6 (15) | -6.2 (11)  | -23.0 (13) | 8.5 (12)   |
| C39  | 47.8 (15) | 61.0 (17) | 57.6 (17) | -10.6 (14) | 0.7 (13)   | -20.1 (13) |
| C40  | 31.4 (11) | 20.4 (9)  | 33.1 (10) | -3.8 (8)   | -10.7 (8)  | -2.7 (8)   |
| C41  | 35.9 (12) | 34.4 (11) | 32.3 (11) | -3.4 (9)   | -10.0 (9)  | -7.8 (9)   |
| C42  | 37.7 (12) | 45.4 (13) | 41.7 (13) | -1.6 (10)  | -18.3 (10) | -9.6 (10)  |
| C43  | 29.7 (11) | 36.3 (12) | 47.9 (13) | -3.3 (10)  | -13.1 (10) | -5.5 (9)   |



**Table S4.** Anisotropic Displacement Parameters ( $\text{\AA}^2 \times 10^3$ ) for  $[\text{AD}^{\text{Me}}\text{HZn}_2\text{Et}_2][\text{B}(\text{C}_8\text{H}_3\text{F}_6)_4]$  6-  
 BARF. The Anisotropic displacement factor exponent takes the form: -  
 $2\pi^2[h^2a^*U_{11}+2hka^*b^*U_{12}+\dots]$ .

| Atom | $U_{11}$  | $U_{22}$  | $U_{33}$  | $U_{23}$   | $U_{13}$   | $U_{12}$   |
|------|-----------|-----------|-----------|------------|------------|------------|
| C44  | 31.2 (11) | 22.0 (10) | 37.5 (11) | -3.8 (8)   | -6.8 (9)   | -2.1 (8)   |
| C45  | 30.2 (10) | 23.4 (10) | 34.3 (11) | -5.2 (8)   | -11.4 (8)  | 0.0 (8)    |
| C46  | 32.4 (11) | 26.6 (10) | 30.1 (10) | -2.1 (8)   | -9.8 (8)   | -2.0 (8)   |
| C47  | 32.3 (11) | 34.1 (11) | 35.1 (11) | -6.3 (9)   | -7.9 (9)   | -6.2 (9)   |
| C48  | 42.1 (13) | 38.3 (12) | 36.9 (12) | -11.5 (10) | -11.0 (10) | -4.5 (10)  |
| C49  | 39.2 (12) | 41.2 (12) | 33.1 (11) | -8.5 (10)  | -4.9 (9)   | 0.4 (10)   |
| C50  | 33.5 (11) | 37.7 (12) | 33.0 (11) | -3.2 (9)   | -6.3 (9)   | -4.9 (10)  |
| C51  | 35.1 (11) | 30.9 (11) | 32.8 (11) | -3.6 (9)   | -9.2 (9)   | -5.5 (9)   |
| C52A | 46 (2)    | 77 (4)    | 50 (2)    | -3 (2)     | -25.4 (18) | -22 (2)    |
| F1A  | 35.9 (11) | 195 (4)   | 51.9 (14) | -18 (2)    | -18.4 (10) | -13 (2)    |
| F2A  | 103 (2)   | 76.6 (16) | 59.0 (17) | -17.5 (13) | -44.5 (15) | -21.8 (18) |
| F3A  | 80 (4)    | 80.4 (12) | 56 (4)    | 1.1 (19)   | -40 (2)    | 5.0 (17)   |
| C52B | 46 (2)    | 77 (4)    | 50 (2)    | -3 (2)     | -25.4 (18) | -22 (2)    |
| F4A  | 103 (2)   | 76.6 (16) | 59.0 (17) | -17.5 (13) | -44.5 (15) | -21.8 (18) |
| F5A  | 80 (4)    | 80.4 (12) | 56 (4)    | 1.1 (19)   | -40 (2)    | 5.0 (17)   |
| F6A  | 35.9 (11) | 195 (4)   | 51.9 (14) | -18 (2)    | -18.4 (10) | -13 (2)    |
| C53  | 23.6 (10) | 28.6 (10) | 32.3 (10) | -4.8 (8)   | -8.9 (8)   | -2.2 (8)   |
| C54  | 27.4 (10) | 30.9 (11) | 31.9 (11) | -3.6 (8)   | -9.9 (8)   | -3.0 (8)   |
| C55  | 27.3 (10) | 33.7 (11) | 39.6 (12) | -10.7 (9)  | -9.4 (9)   | -2.2 (9)   |
| C56  | 31.9 (11) | 27.1 (10) | 45.5 (13) | -7.8 (9)   | -8.6 (9)   | -2.3 (9)   |
| C57  | 30.9 (11) | 29.7 (11) | 38.3 (12) | -1.1 (9)   | -9.8 (9)   | -2.6 (9)   |
| C58  | 29.7 (10) | 31.2 (11) | 32.1 (11) | -5.4 (9)   | -9.0 (8)   | -2.0 (9)   |
| C59  | 29.4 (10) | 28.1 (10) | 29.9 (10) | -6.2 (8)   | -7.0 (8)   | 1.3 (8)    |
| C60  | 31.9 (11) | 30.4 (11) | 37.4 (11) | -6.1 (9)   | -11.3 (9)  | 1.0 (9)    |
| C61  | 35.7 (12) | 38.6 (12) | 46.2 (13) | -12.7 (10) | -18.8 (10) | 7.5 (10)   |
| C62  | 45.1 (13) | 37.0 (12) | 43.8 (13) | -6.8 (10)  | -20.8 (11) | 13.8 (11)  |
| C63  | 39.6 (12) | 29.3 (11) | 39.9 (12) | -5.2 (9)   | -9.2 (10)  | 8.6 (10)   |
| C64  | 29.9 (11) | 30.0 (11) | 37.0 (11) | -7.1 (9)   | -9.2 (9)   | 2.0 (9)    |
| C65  | 53.8 (15) | 52.0 (15) | 49.1 (14) | -23.6 (12) | -8.6 (12)  | -8.3 (12)  |
| F1B  | 74 (6)    | 86 (8)    | 84 (7)    | -55 (5)    | 16 (5)     | -48 (6)    |
| F2B  | 82.1 (17) | 147 (4)   | 104 (3)   | -103 (3)   | 32 (2)     | -49 (2)    |
| F3B  | 87 (2)    | 69.8 (13) | 86 (2)    | -22.8 (16) | -54 (2)    | -14.0 (19) |
| F4B  | 82.1 (17) | 147 (4)   | 104 (3)   | -103 (3)   | 32 (2)     | -49 (2)    |
| F5B  | 87 (2)    | 69.8 (13) | 86 (2)    | -22.8 (16) | -54 (2)    | -14.0 (19) |
| F6B  | 141 (5)   | 37.3 (16) | 91 (3)    | -7 (2)     | -64 (3)    | -19 (2)    |

**Table S4.** Anisotropic Displacement Parameters ( $\text{\AA}^2 \times 10^3$ ) for  $[\text{AD}^{\text{Me}}\text{HZn}_2\text{Et}_2][\text{B}(\text{C}_8\text{H}_3\text{F}_6)_4]$  **6-BArF**. The Anisotropic displacement factor exponent takes the form: -  $2\pi^2[h^2a^*U_{11}+2hka^*b^*U_{12}+\dots]$ .

| Atom | $U_{11}$  | $U_{22}$  | $U_{33}$  | $U_{23}$  | $U_{13}$  | $U_{12}$  |
|------|-----------|-----------|-----------|-----------|-----------|-----------|
| C66  | 39.6 (13) | 57.9 (16) | 39.8 (13) | -6.7 (12) | -2.7 (10) | -9.5 (12) |
| B1   | 29.3 (12) | 28.0 (12) | 29.7 (12) | -4.1 (9)  | -8.9 (9)  | -3.7 (9)  |

**Table S5.** Bond Lengths for  $[\text{AD}^{\text{Me}}\text{HZn}_2\text{Et}_2][\text{B}(\text{C}_8\text{H}_3\text{F}_6)_4]$  **6-BArF**.

| Atom | Atom | Length/ $\text{\AA}$ | Atom | Atom | Length/ $\text{\AA}$ |
|------|------|----------------------|------|------|----------------------|
| Zn1  | N1   | 2.0886 (17)          | C15  | C16  | 1.402 (3)            |
| Zn1  | N3   | 2.0413 (17)          | C15  | C36  | 1.493 (3)            |
| Zn1  | N7   | 2.0722 (18)          | C16  | C17  | 1.368 (3)            |
| Zn1  | C20  | 1.994 (2)            | C17  | C37  | 1.493 (3)            |
| Zn2  | N3   | 2.0816 (17)          | C20  | C21  | 1.524 (4)            |
| Zn2  | N4   | 2.1149 (18)          | C22  | C23  | 1.408 (3)            |
| Zn2  | N8   | 2.1656 (18)          | C22  | C27  | 1.418 (3)            |
| Zn2  | C28  | 1.968 (2)            | C23  | C24  | 1.396 (3)            |
| Cl1  | C5   | 1.735 (3)            | C24  | C25  | 1.380 (3)            |
| Cl2  | C5   | 1.737 (4)            | C25  | C26  | 1.379 (3)            |
| F1   | C3   | 1.338 (3)            | C26  | C27  | 1.391 (3)            |
| F2   | C3   | 1.340 (3)            | C27  | C33  | 1.532 (3)            |
| F3   | C66  | 1.320 (3)            | C28  | C29  | 1.531 (3)            |
| F4   | C66  | 1.331 (3)            | C30  | C31  | 1.394 (4)            |
| F10  | C3   | 1.352 (3)            | C30  | C38  | 1.491 (4)            |
| F11  | C4   | 1.331 (3)            | C31  | C32  | 1.374 (4)            |
| F13  | C2   | 1.334 (3)            | C32  | C39  | 1.484 (4)            |
| F14  | C6   | 1.331 (3)            | C40  | C41  | 1.397 (3)            |
| F16  | C66  | 1.334 (3)            | C40  | C45  | 1.399 (3)            |
| F17  | C4   | 1.324 (3)            | C40  | B1   | 1.637 (3)            |
| F18  | C4   | 1.336 (3)            | C41  | C42  | 1.388 (3)            |
| F21  | C2   | 1.344 (3)            | C42  | C43  | 1.390 (3)            |
| F22  | C2   | 1.342 (4)            | C42  | C52A | 1.510 (11)           |
| F23  | C6   | 1.333 (3)            | C42  | C52B | 1.512 (7)            |
| F24  | C6   | 1.336 (3)            | C43  | C44  | 1.381 (3)            |
| N1   | N2   | 1.366 (2)            | C44  | C45  | 1.391 (3)            |
| N1   | C10  | 1.335 (3)            | C46  | C47  | 1.398 (3)            |
| N2   | C8   | 1.359 (3)            | C46  | C51  | 1.400 (3)            |
| N2   | C14  | 1.458 (3)            | C46  | B1   | 1.635 (3)            |

**Table S5.** Bond Lengths for [AD<sup>Me</sup>HZn<sub>2</sub>Et<sub>2</sub>][B(C<sub>8</sub>H<sub>3</sub>F<sub>6</sub>)<sub>4</sub>] **6**-BArF.

| Atom | Atom | Length/Å   | Atom | Atom | Length/Å   |
|------|------|------------|------|------|------------|
| N3   | C22  | 1.415 (3)  | C47  | C48  | 1.392 (3)  |
| N4   | N5   | 1.371 (3)  | C48  | C49  | 1.388 (3)  |
| N4   | C13  | 1.334 (3)  | C48  | C65  | 1.492 (3)  |
| N5   | C11  | 1.362 (3)  | C49  | C50  | 1.383 (3)  |
| N5   | C33  | 1.454 (3)  | C50  | C51  | 1.381 (3)  |
| N6   | N7   | 1.367 (2)  | C50  | C66  | 1.504 (3)  |
| N6   | C14  | 1.460 (3)  | C52A | F1A  | 1.330 (11) |
| N6   | C17  | 1.358 (3)  | C52A | F2A  | 1.341 (11) |
| N7   | C15  | 1.333 (3)  | C52A | F3A  | 1.330 (13) |
| N8   | N9   | 1.371 (3)  | C52B | F4A  | 1.347 (7)  |
| N8   | C30  | 1.337 (3)  | C52B | F5A  | 1.327 (9)  |
| N9   | C32  | 1.356 (3)  | C52B | F6A  | 1.310 (7)  |
| N9   | C33  | 1.462 (3)  | C53  | C54  | 1.400 (3)  |
| C2   | C61  | 1.489 (4)  | C53  | C58  | 1.400 (3)  |
| C3   | C44  | 1.491 (3)  | C53  | B1   | 1.640 (3)  |
| C4   | C55  | 1.495 (3)  | C54  | C55  | 1.388 (3)  |
| C6   | C63  | 1.499 (3)  | C55  | C56  | 1.385 (3)  |
| C7   | F1C  | 1.353 (3)  | C56  | C57  | 1.388 (3)  |
| C7   | F2C  | 1.301 (4)  | C57  | C58  | 1.394 (3)  |
| C7   | F3C  | 1.315 (4)  | C59  | C60  | 1.395 (3)  |
| C7   | F4C  | 1.355 (12) | C59  | C64  | 1.403 (3)  |
| C7   | F5C  | 1.320 (11) | C59  | B1   | 1.639 (3)  |
| C7   | F6C  | 1.281 (9)  | C60  | C61  | 1.391 (3)  |
| C7   | C57  | 1.494 (3)  | C61  | C62  | 1.384 (4)  |
| C8   | C9   | 1.370 (3)  | C62  | C63  | 1.384 (4)  |
| C8   | C18  | 1.490 (3)  | C63  | C64  | 1.390 (3)  |
| C9   | C10  | 1.394 (3)  | C65  | F1B  | 1.302 (10) |
| C10  | C19  | 1.492 (3)  | C65  | F2B  | 1.366 (9)  |
| C11  | C12  | 1.363 (4)  | C65  | F3B  | 1.221 (7)  |
| C11  | C34  | 1.497 (4)  | C65  | F4B  | 1.332 (4)  |
| C12  | C13  | 1.404 (4)  | C65  | F5B  | 1.386 (4)  |
| C13  | C35  | 1.494 (4)  | C65  | F6B  | 1.292 (5)  |
| C14  | C23  | 1.528 (3)  |      |      |            |

**Table S6.** Bond Angles for [AD<sup>Me</sup>HZn<sub>2</sub>Et<sub>2</sub>][B(C<sub>8</sub>H<sub>3</sub>F<sub>6</sub>)<sub>4</sub>] **6**-BArF.

| Atom | Atom | Atom | Angle/°     | Atom | Atom | Atom | Angle/°     |
|------|------|------|-------------|------|------|------|-------------|
| N3   | Zn1  | N1   | 99.53 (7)   | C24  | C23  | C14  | 113.35 (18) |
| N3   | Zn1  | N7   | 92.21 (7)   | C24  | C23  | C22  | 119.89 (19) |
| N7   | Zn1  | N1   | 88.70 (7)   | C25  | C24  | C23  | 122.0 (2)   |
| C20  | Zn1  | N1   | 123.58 (8)  | C26  | C25  | C24  | 118.65 (19) |
| C20  | Zn1  | N3   | 117.55 (8)  | C25  | C26  | C27  | 121.0 (2)   |
| C20  | Zn1  | N7   | 127.39 (8)  | C22  | C27  | C33  | 124.86 (18) |
| N3   | Zn2  | N4   | 101.52 (7)  | C26  | C27  | C22  | 120.87 (19) |
| N3   | Zn2  | N8   | 84.08 (7)   | C26  | C27  | C33  | 113.82 (18) |
| N4   | Zn2  | N8   | 85.56 (7)   | C29  | C28  | Zn2  | 114.00 (17) |
| C28  | Zn2  | N3   | 133.15 (9)  | N8   | C30  | C31  | 109.9 (2)   |
| C28  | Zn2  | N4   | 119.38 (9)  | N8   | C30  | C38  | 120.8 (2)   |
| C28  | Zn2  | N8   | 118.76 (9)  | C31  | C30  | C38  | 129.2 (2)   |
| N2   | N1   | Zn1  | 116.65 (13) | C32  | C31  | C30  | 107.2 (2)   |
| C10  | N1   | Zn1  | 135.88 (15) | N9   | C32  | C31  | 105.7 (2)   |
| C10  | N1   | N2   | 105.60 (16) | N9   | C32  | C39  | 122.9 (2)   |
| N1   | N2   | C14  | 120.92 (16) | C31  | C32  | C39  | 131.4 (2)   |
| C8   | N2   | N1   | 111.55 (17) | N5   | C33  | N9   | 109.56 (17) |
| C8   | N2   | C14  | 127.21 (17) | N5   | C33  | C27  | 108.89 (17) |
| Zn1  | N3   | Zn2  | 108.43 (8)  | N9   | C33  | C27  | 119.35 (17) |
| C22  | N3   | Zn1  | 127.77 (13) | C41  | C40  | C45  | 115.55 (19) |
| C22  | N3   | Zn2  | 113.11 (12) | C41  | C40  | B1   | 122.88 (18) |
| N5   | N4   | Zn2  | 116.16 (13) | C45  | C40  | B1   | 121.27 (18) |
| C13  | N4   | Zn2  | 133.63 (16) | C42  | C41  | C40  | 122.1 (2)   |
| C13  | N4   | N5   | 105.28 (19) | C41  | C42  | C43  | 121.4 (2)   |
| N4   | N5   | C33  | 118.53 (16) | C41  | C42  | C52A | 122.9 (5)   |
| C11  | N5   | N4   | 111.66 (19) | C41  | C42  | C52B | 116.4 (3)   |
| C11  | N5   | C33  | 127.90 (19) | C43  | C42  | C52A | 114.7 (5)   |
| N7   | N6   | C14  | 122.39 (16) | C43  | C42  | C52B | 121.8 (3)   |
| C17  | N6   | N7   | 111.04 (16) | C44  | C43  | C42  | 117.4 (2)   |
| C17  | N6   | C14  | 126.21 (17) | C43  | C44  | C3   | 121.1 (2)   |
| N6   | N7   | Zn1  | 116.49 (12) | C43  | C44  | C45  | 121.0 (2)   |
| C15  | N7   | Zn1  | 137.10 (14) | C45  | C44  | C3   | 117.82 (19) |
| C15  | N7   | N6   | 105.88 (16) | C44  | C45  | C40  | 122.46 (19) |
| N9   | N8   | Zn2  | 113.86 (13) | C47  | C46  | C51  | 115.4 (2)   |
| C30  | N8   | Zn2  | 128.76 (15) | C47  | C46  | B1   | 125.41 (19) |
| C30  | N8   | N9   | 105.38 (18) | C51  | C46  | B1   | 118.48 (18) |
| N8   | N9   | C33  | 121.28 (17) | C48  | C47  | C46  | 121.9 (2)   |
| C32  | N9   | N8   | 111.77 (19) | C47  | C48  | C65  | 119.5 (2)   |

**Table S6.** Bond Angles for [AD<sup>Me</sup>HZn<sub>2</sub>Et<sub>2</sub>][B(C<sub>8</sub>H<sub>3</sub>F<sub>6</sub>)<sub>4</sub>] **6**-BARF.

|     |    |     |             |     |      |     |             |
|-----|----|-----|-------------|-----|------|-----|-------------|
| C32 | N9 | C33 | 126.8 (2)   | C49 | C48  | C47 | 121.2 (2)   |
| F13 | C2 | F21 | 107.1 (2)   | C49 | C48  | C65 | 119.2 (2)   |
| F13 | C2 | F22 | 106.2 (2)   | C50 | C49  | C48 | 117.8 (2)   |
| F13 | C2 | C61 | 113.7 (2)   | C49 | C50  | C66 | 121.5 (2)   |
| F21 | C2 | C61 | 111.5 (2)   | C51 | C50  | C49 | 120.7 (2)   |
| F22 | C2 | F21 | 104.9 (3)   | C51 | C50  | C66 | 117.9 (2)   |
| F22 | C2 | C61 | 112.8 (2)   | C50 | C51  | C46 | 123.0 (2)   |
| F1  | C3 | F2  | 106.69 (18) | F1A | C52A | C42 | 118.7 (9)   |
| F1  | C3 | F10 | 105.79 (17) | F1A | C52A | F2A | 101.0 (9)   |
| F1  | C3 | C44 | 113.86 (19) | F1A | C52A | F3A | 103.5 (15)  |
| F2  | C3 | F10 | 105.51 (19) | F2A | C52A | C42 | 107.4 (8)   |
| F2  | C3 | C44 | 112.47 (18) | F3A | C52A | C42 | 116 (2)     |
| F10 | C3 | C44 | 111.91 (18) | F3A | C52A | F2A | 108.3 (17)  |
| F11 | C4 | F18 | 105.3 (2)   | F4A | C52B | C42 | 114.9 (5)   |
| F11 | C4 | C55 | 113.9 (2)   | F5A | C52B | C42 | 109.5 (13)  |
| F17 | C4 | F11 | 106.7 (2)   | F5A | C52B | F4A | 101.6 (9)   |
| F17 | C4 | F18 | 105.9 (2)   | F6A | C52B | C42 | 112.4 (6)   |
| F17 | C4 | C55 | 112.4 (2)   | F6A | C52B | F4A | 103.2 (5)   |
| F18 | C4 | C55 | 112.0 (2)   | F6A | C52B | F5A | 114.8 (11)  |
| Cl1 | C5 | Cl2 | 112.78 (19) | C54 | C53  | C58 | 115.77 (19) |
| F14 | C6 | F23 | 105.1 (3)   | C54 | C53  | B1  | 120.84 (18) |
| F14 | C6 | F24 | 105.9 (2)   | C58 | C53  | B1  | 123.11 (18) |
| F14 | C6 | C63 | 112.8 (2)   | C55 | C54  | C53 | 122.5 (2)   |
| F23 | C6 | F24 | 107.2 (2)   | C54 | C55  | C4  | 118.6 (2)   |
| F23 | C6 | C63 | 112.4 (2)   | C56 | C55  | C4  | 120.7 (2)   |
| F24 | C6 | C63 | 112.8 (2)   | C56 | C55  | C54 | 120.7 (2)   |
| F1C | C7 | C57 | 111.8 (2)   | C55 | C56  | C57 | 118.1 (2)   |
| F2C | C7 | F1C | 106.8 (3)   | C56 | C57  | C7  | 119.0 (2)   |
| F2C | C7 | F3C | 108.9 (3)   | C56 | C57  | C58 | 120.9 (2)   |
| F2C | C7 | C57 | 113.4 (2)   | C58 | C57  | C7  | 120.1 (2)   |
| F3C | C7 | F1C | 103.4 (3)   | C57 | C58  | C53 | 122.0 (2)   |
| F3C | C7 | C57 | 111.9 (3)   | C60 | C59  | C64 | 115.82 (19) |
| F4C | C7 | C57 | 113.4 (8)   | C60 | C59  | B1  | 121.46 (19) |
| F5C | C7 | F4C | 94.7 (10)   | C64 | C59  | B1  | 122.50 (19) |
| F5C | C7 | C57 | 116.3 (8)   | C61 | C60  | C59 | 122.3 (2)   |
| F6C | C7 | F4C | 101.8 (9)   | C60 | C61  | C2  | 117.4 (2)   |
| F6C | C7 | F5C | 110.1 (10)  | C62 | C61  | C2  | 121.7 (2)   |

**Table S6.** Bond Angles for [AD<sup>Me</sup>HZn<sub>2</sub>Et<sub>2</sub>][B(C<sub>8</sub>H<sub>3</sub>F<sub>6</sub>)<sub>4</sub>] **6**-BArF.

|     |     |     |             |     |     |     |             |
|-----|-----|-----|-------------|-----|-----|-----|-------------|
| F6C | C7  | C57 | 117.4 (5)   | C62 | C61 | C60 | 120.9 (2)   |
| N2  | C8  | C9  | 105.80 (19) | C61 | C62 | C63 | 118.0 (2)   |
| N2  | C8  | C18 | 123.2 (2)   | C62 | C63 | C6  | 121.0 (2)   |
| C9  | C8  | C18 | 131.0 (2)   | C62 | C63 | C64 | 121.0 (2)   |
| C8  | C9  | C10 | 107.15 (19) | C64 | C63 | C6  | 118.0 (2)   |
| N1  | C10 | C9  | 109.90 (19) | C63 | C64 | C59 | 122.0 (2)   |
| N1  | C10 | C19 | 120.87 (19) | F1B | C65 | C48 | 112.7 (9)   |
| C9  | C10 | C19 | 129.2 (2)   | F1B | C65 | F2B | 95.6 (8)    |
| N5  | C11 | C12 | 106.0 (2)   | F2B | C65 | C48 | 109.2 (4)   |
| N5  | C11 | C34 | 122.7 (2)   | F3B | C65 | C48 | 112.9 (5)   |
| C12 | C11 | C34 | 131.4 (2)   | F3B | C65 | F1B | 115.0 (9)   |
| C11 | C12 | C13 | 107.1 (2)   | F3B | C65 | F2B | 110.0 (6)   |
| N4  | C13 | C12 | 110.0 (2)   | F4B | C65 | C48 | 114.5 (3)   |
| N4  | C13 | C35 | 120.5 (2)   | F4B | C65 | F5B | 103.8 (3)   |
| C12 | C13 | C35 | 129.5 (2)   | F5B | C65 | C48 | 112.2 (2)   |
| N2  | C14 | N6  | 110.64 (16) | F6B | C65 | C48 | 113.9 (4)   |
| N2  | C14 | C23 | 113.81 (17) | F6B | C65 | F4B | 109.9 (4)   |
| N6  | C14 | C23 | 117.83 (16) | F6B | C65 | F5B | 101.3 (4)   |
| N7  | C15 | C16 | 109.95 (18) | F3  | C66 | F4  | 105.9 (2)   |
| N7  | C15 | C36 | 120.70 (19) | F3  | C66 | F16 | 109.1 (2)   |
| C16 | C15 | C36 | 129.4 (2)   | F3  | C66 | C50 | 113.0 (2)   |
| C17 | C16 | C15 | 106.51 (19) | F4  | C66 | F16 | 104.4 (2)   |
| N6  | C17 | C16 | 106.60 (18) | F4  | C66 | C50 | 112.6 (2)   |
| N6  | C17 | C37 | 121.90 (19) | F16 | C66 | C50 | 111.3 (2)   |
| C16 | C17 | C37 | 131.5 (2)   | C40 | B1  | C53 | 104.52 (16) |
| C21 | C20 | Zn1 | 113.72 (17) | C40 | B1  | C59 | 112.00 (17) |
| N3  | C22 | C27 | 120.19 (18) | C46 | B1  | C40 | 114.72 (17) |
| C23 | C22 | N3  | 122.46 (18) | C46 | B1  | C53 | 111.83 (17) |
| C23 | C22 | C27 | 117.35 (18) | C46 | B1  | C59 | 103.05 (16) |
| C22 | C23 | C14 | 126.71 (17) | C59 | B1  | C53 | 110.93 (17) |

**Table S7.** Hydrogen Atom Coordinates ( $\text{\AA} \times 10^4$ ) and Isotropic Displacement Parameters ( $\text{\AA}^2 \times 10^3$ ) for [AD<sup>Me</sup>HZn<sub>2</sub>Et<sub>2</sub>][B(C<sub>8</sub>H<sub>3</sub>F<sub>6</sub>)<sub>4</sub>] **6**-BArF.

| Atom | <i>x</i>  | <i>y</i>  | <i>z</i>  | U(eq) |
|------|-----------|-----------|-----------|-------|
| H1   | 9730 (20) | 4510 (20) | 2625 (13) | 40    |

**Table S7.** Hydrogen Atom Coordinates ( $\text{\AA} \times 10^4$ ) and Isotropic Displacement Parameters ( $\text{\AA}^2 \times 10^3$ ) for  $[\text{AD}^{\text{Mc}}\text{HZn}_2\text{Et}_2][\text{B}(\text{C}_8\text{H}_3\text{F}_6)_4]$  **6-BArF**.

| Atom | <i>x</i> | <i>y</i> | <i>z</i> | U(eq) |
|------|----------|----------|----------|-------|
| H5A  | 6256.76  | 3705.54  | 2018.64  | 103   |
| H5B  | 5885.19  | 3559.03  | 2804.24  | 103   |
| H9   | 7919.28  | 5456.28  | 33.11    | 43    |
| H12  | 10581.46 | 7148.2   | 4637.14  | 58    |
| H14  | 9381.85  | 7448.82  | 1056.39  | 33    |
| H16  | 12934.01 | 7669.31  | 498.58   | 39    |
| H18A | 8900.19  | 7824.38  | -42.43   | 60    |
| H18B | 7978.42  | 7765.56  | 602.8    | 60    |
| H18C | 7772.38  | 7477.26  | -43.92   | 60    |
| H19A | 8682.48  | 3525.67  | 293.24   | 59    |
| H19B | 8367.18  | 3298.02  | 1083.82  | 59    |
| H19C | 9565.94  | 3349.18  | 707.77   | 59    |
| H20A | 11441.68 | 3057.53  | 1122.67  | 40    |
| H20B | 11796.26 | 3130.85  | 1777.66  | 40    |
| H21A | 9900.97  | 2307.21  | 1733.51  | 80    |
| H21B | 10095.16 | 2526.5   | 2402.6   | 80    |
| H21C | 10806.59 | 1713.38  | 2053.12  | 80    |
| H24  | 8163.89  | 7840.76  | 1772.82  | 38    |
| H25  | 7122.29  | 7736.32  | 2828.91  | 42    |
| H26  | 7492.01  | 6497.59  | 3697.98  | 40    |
| H28A | 12860.53 | 4301.24  | 2292.81  | 50    |
| H28B | 13047.26 | 5422.22  | 2345.9   | 50    |
| H29A | 13981.76 | 4246.02  | 3005.05  | 79    |
| H29B | 12919.24 | 3721.5   | 3426.55  | 79    |
| H29C | 13143.65 | 4843.16  | 3462.47  | 79    |
| H31  | 9085.54  | 1837.79  | 3930.57  | 56    |
| H33  | 8304.8   | 5174.95  | 4134.57  | 37    |
| H34A | 8034.27  | 6344.29  | 4874.46  | 78    |
| H34B | 8742.12  | 6340.99  | 5388.6   | 78    |
| H34C | 8517.66  | 5308     | 5212.44  | 78    |
| H35A | 12361.62 | 6779.42  | 3000.02  | 88    |
| H35B | 12566.52 | 6983.96  | 3670.25  | 88    |
| H35C | 11962.48 | 7810.03  | 3225.53  | 88    |
| H36A | 13540.26 | 5549.14  | 296.43   | 52    |
| H36B | 12913.68 | 4781.72  | 927.27   | 52    |
| H36C | 13678.6  | 5568.79  | 1019.77  | 52    |

**Table S7.** Hydrogen Atom Coordinates ( $\text{\AA} \times 10^4$ ) and Isotropic Displacement Parameters ( $\text{\AA}^2 \times 10^3$ ) for  $[\text{AD}^{\text{Me}}\text{HZn}_2\text{Et}_2][\text{B}(\text{C}_8\text{H}_3\text{F}_6)_4]$  **6-BArF**.

| Atom | <i>x</i> | <i>y</i> | <i>z</i> | U(eq) |
|------|----------|----------|----------|-------|
| H37A | 11409.74 | 9130.45  | 547.49   | 55    |
| H37B | 10516.08 | 8756.09  | 1193.43  | 55    |
| H37C | 10352.38 | 8708.32  | 480.24   | 55    |
| H38A | 11154.83 | 1665.88  | 3372.85  | 74    |
| H38B | 11626.98 | 2149.88  | 3857.71  | 74    |
| H38C | 11761.75 | 2703.22  | 3097.68  | 74    |
| H39A | 7221.71  | 3932.92  | 3874.82  | 85    |
| H39B | 7332.1   | 3579.63  | 4624.47  | 85    |
| H39C | 7189.35  | 2762.18  | 4218.87  | 85    |
| H41  | 3334.23  | 515.78   | 6442.4   | 41    |
| H43  | 636.69   | -110.07  | 7816.99  | 45    |
| H45  | 3363.19  | -195.51  | 8377.43  | 35    |
| H47  | 4483.28  | -988.71  | 6414.71  | 40    |
| H49  | 7279.79  | -981.1   | 5125.38  | 46    |
| H51  | 6734.03  | 832.2    | 6435.86  | 40    |
| H54  | 4706.09  | 1481.81  | 8139.62  | 36    |
| H56  | 4899.86  | 4358.23  | 7096.1   | 42    |
| H58  | 5110.84  | 2044.37  | 6156.72  | 37    |
| H60  | 6488.31  | 684.98   | 7698.41  | 39    |
| H62  | 6796.82  | -1898.36 | 9018.94  | 49    |
| H64  | 4506.37  | -1577.4  | 8016.35  | 39    |

**Table S8.** Atomic Occupancy for  $[\text{AD}^{\text{Me}}\text{HZn}_2\text{Et}_2][\text{B}(\text{C}_8\text{H}_3\text{F}_6)_4]$  **6-BArF**.

| Atom | Occupancy | Atom | Occupancy | Atom | Occupancy |
|------|-----------|------|-----------|------|-----------|
| F1C  | 0.819 (7) | F2C  | 0.819 (7) | F3C  | 0.819 (7) |
| F4C  | 0.181 (7) | F5C  | 0.181 (7) | F6C  | 0.181 (7) |
| C52A | 0.382 (2) | F1A  | 0.382 (2) | F2A  | 0.382 (2) |
| F3A  | 0.382 (2) | C52B | 0.618 (2) | F4A  | 0.618 (2) |
| F5A  | 0.618 (2) | F6A  | 0.618 (2) | F1B  | 0.287 (5) |
| F2B  | 0.287 (5) | F3B  | 0.287 (5) | F4B  | 0.713 (5) |
| F5B  | 0.713 (5) | F6B  | 0.713 (5) |      |           |



## S7. Polymerization.

### S7.1 Catalyst Optimization.

*General procedure.* *rac*-lactide (144 mg, 1 mmol, 100 equivalents with respect to zinc) was dissolved in the CH<sub>2</sub>Cl<sub>2</sub> (1.0 mL). If no alcohol cocatalyst was used, 1.0 mL solution of metal complex (0.005 mmol, 1 equivalent) in CH<sub>2</sub>Cl<sub>2</sub> was then added to the monomer solution. If an alcohol cocatalyst was used, then a 1 mL solution of complex, cocatalyst, and CH<sub>2</sub>Cl<sub>2</sub> was premixed and stirred for 24 hours before being added to the monomer solution. Note that the small volumes of cocatalysts were measured by preparing a stock solution of cocatalyst in CH<sub>2</sub>Cl<sub>2</sub>. At various time points, aliquots (about 0.3 mL) of the crude reaction mixture were quenched with a solution of benzoic acid in CH<sub>2</sub>Cl<sub>2</sub> (0.1 M), concentrated under vacuum, and dissolved in CDCl<sub>3</sub> for crude NMR analysis. Fractional conversion was calculated based on the ratio of residual monomer to polymer. See Figure S46 for the identification of <sup>1</sup>H-NMR peaks. Where indicated, <sup>1</sup>H-NMR, GPC, and DSC analysis was performed on a purified polymer sample obtained by precipitation in cold methanol followed by filtration and drying.

*Table S9, entry 1.* By the general procedure with AD<sup>Mc</sup>H<sub>2</sub> (**1**, 2.5 mg, 0.005 mmol, 1 equivalents), Et<sub>2</sub>Zn (1 μL, 0.01 mmol, 2 equiv.) *rac*-lactide (144 mg, 1 mmol, 200 equivalents), and CH<sub>2</sub>Cl<sub>2</sub> (2 mL).

*Table S9, entry 2.* By the general procedure with diethylzinc (1.03 μL, 0.01 mmol, 1 equivalents), ethyl alcohol (0.58 μL, 0.01 mmol, 1 equivalents), *rac*-lactide (144 mg, 1 mmol, 100 equivalents), and CH<sub>2</sub>Cl<sub>2</sub> (2 mL).

*Table S9, entry 3.* By the general procedure with diethylzinc (1.03 μL, 0.01 mmol, 1 equivalents), ethyl alcohol (1.17 μL, 0.01 mmol, 1 equivalents), *rac*-lactide (144 mg, 1 mmol, 100 equivalents), and CH<sub>2</sub>Cl<sub>2</sub> (2 mL).

*Table S9, entry 4.* By the general procedure with AD<sup>Mc</sup>HZnEt (**7**) (5.9 mg, 0.01 mmol, 1 equivalents), ethyl alcohol (0.58 μL, 0.01 mmol, 1 equivalents), *rac*-lactide (144 mg, 1 mmol, 100 equivalents), and CH<sub>2</sub>Cl<sub>2</sub> (2 mL).

*Table S9, entry 5.* By the general procedure with [AD<sup>Mc</sup>HZn<sub>2</sub>Et<sub>2</sub>][BArF] (**6-ArF**, 7.7 mg, 0.005 mmol, 1 equivalents), ethyl alcohol (0.58 μL, 0.01 mmol, 2 equivalents), *rac*-lactide (144 mg, 1 mmol, 200 equivalents), and CH<sub>2</sub>Cl<sub>2</sub> (2 mL).

*Table S9, entry 6.* By the general procedure with [AD<sup>Mc</sup>HZn<sub>2</sub>Et<sub>2</sub>][NTf<sub>2</sub>] (**6-NTf<sub>2</sub>**, 4.8 mg, 0.005 mmol, 1 equivalents), ethyl alcohol (0.58 μL, 0.01 mmol, 2 equivalents), *rac*-lactide (144 mg, 1 mmol, 200 equivalents), and CH<sub>2</sub>Cl<sub>2</sub> (2 mL).

*Table S9, entry 7.* By the general procedure with [AD<sup>Mc</sup>HZn<sub>2</sub>Et<sub>2</sub>][BF<sub>4</sub>] (**6-BF<sub>4</sub>**, 3.9 mg, 0.005 mmol, 1 equivalents), ethyl alcohol (0.58 μL, 0.01 mmol, 2 equivalents), *rac*-lactide (144 mg, 1 mmol, 200 equivalents), and CH<sub>2</sub>Cl<sub>2</sub> (2 mL).

*Table S9, entry 8.* By the general procedure with  $[\text{AD}^{\text{Me}}\text{HZn}_2\text{Et}_2][\text{PF}_6]$  (**6-PF<sub>6</sub>**, 4.2 mg, 0.005 mmol, 1 equivalents), ethyl alcohol (0.58  $\mu\text{L}$ , 0.01 mmol, 2 equivalents), *rac*-lactide (144 mg, 1 mmol, 200 equivalents), and  $\text{CH}_2\text{Cl}_2$  (2 mL).

*Table S9, entry 9.* By the general procedure with  $[\text{AD}^{\text{Me}}\text{HZn}_2\text{Et}_2][\text{OTf}]$  (**6-OTf**, 4.2 mg, 0.005 mmol, 1 equivalents), ethyl alcohol (0.58  $\mu\text{L}$ , 0.01 mmol, 2 equivalents), *rac*-lactide (144 mg, 1 mmol, 200 equivalents), and  $\text{CH}_2\text{Cl}_2$  (2 mL).

*Table S9, entry 10.* By the general procedure with  $[\text{AD}^{\text{Me}}\text{HZn}_2\text{Et}_2][\text{NTf}_2]$  (**6-NTf<sub>2</sub>**, 4.8 mg, 0.005 mmol, 1 equivalents), *rac*-lactide (144 mg, 1 mmol, 200 equivalents), and  $\text{CH}_2\text{Cl}_2$  (2 mL), but no ethyl alcohol.

*Table S9, entry 11.* By the general procedure with  $[\text{PD}^{\text{Me}}\text{Zn}_2\text{Et}_2][\text{NTf}_2]$  (**6-NTf<sub>2</sub>**, 5.1 mg, 0.005 mmol, 1 equivalents), ethyl alcohol (0.58  $\mu\text{L}$ , 0.01 mmol, 2 equivalents), *rac*-lactide (144 mg, 1 mmol, 200 equivalents), and  $\text{CH}_2\text{Cl}_2$  (2 mL).

*Table S9, entry 12.* By the general procedure with  $[\text{PD}^{\text{H}}\text{Zn}_2\text{Et}_2][\text{NTf}_2]$  (**6-NTf<sub>2</sub>**, 9.1 mg, 0.01 mmol, 1 equivalents), benzyl alcohol (2.0  $\mu\text{L}$ , 0.01 mmol, 2 equivalents), *rac*-lactide (288 mg, 2 mmol, 200 equivalents), and  $\text{CH}_2\text{Cl}_2$  (2 mL).

**Table S9.** Catalyst Optimization.

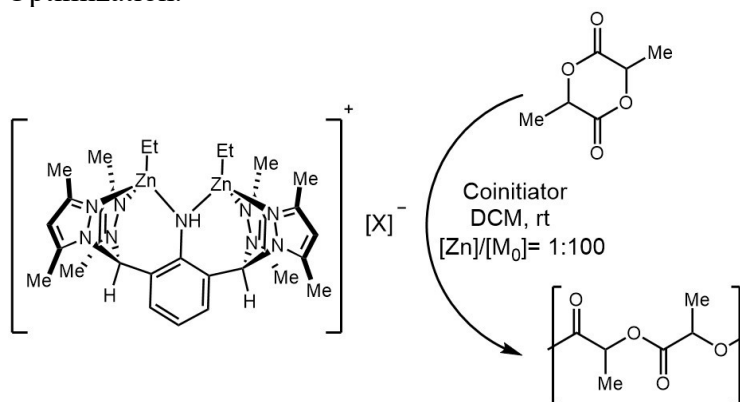

| Entry | Catalyst                                                                        | Alcohol (2 equiv.)  | conv. (30 min) <sup>a</sup> | conv. (1 hr) <sup>a</sup> | conv. (24 hr) <sup>a</sup> | $M_n^b$ | $M_n^{\text{theo}}$ | $M_w/M_n^b$ | DP <sup>c</sup> |
|-------|---------------------------------------------------------------------------------|---------------------|-----------------------------|---------------------------|----------------------------|---------|---------------------|-------------|-----------------|
| 1     | $\text{AD}^{\text{Me}}\text{H}_2$ ( <b>1</b> ) + 2 eq. $\text{ZnEt}_2$          | none                | 0 %                         | 0 %                       | 10 %                       | 260     | 1400                | 1.36        | 2               |
| 2     | $\text{ZnEt}_2$                                                                 | ethyl alcohol (1:1) | 0 %                         | 0 %                       | 37 %                       | --      | --                  | --          | --              |
| 3     | $\text{ZnEt}_2$                                                                 | ethyl alcohol (1:2) | 0 %                         | 3 %                       | 96 %                       | 6300    | 13800               | 1.09        | 44              |
| 4     | $\text{AD}^{\text{Me}}\text{HZnEt}$ ( <b>7</b> )                                | ethyl alcohol       | 0 %                         | 0%                        | 85%                        | 7600    | 12200               | 1.08        | 53              |
| 5     | $[\text{AD}^{\text{Me}}\text{HZn}_2\text{Et}_2][\text{BArF}]$ ( <b>6-BArF</b> ) | ethyl alcohol       | 0%                          | 0%                        | 2%                         | --      | --                  | --          | --              |

|    |                                                                                                        |                |      |      |      |           |       |      |    |
|----|--------------------------------------------------------------------------------------------------------|----------------|------|------|------|-----------|-------|------|----|
| 6  | [AD <sup>Me</sup> HZn <sub>2</sub> Et <sub>2</sub> ][NTf <sub>2</sub> ] ( <b>6</b> -NTf <sub>2</sub> ) | ethyl alcohol  | 13 % | 21 % | 88 % | 7800      | 12700 | 1.03 | 54 |
| 7  | [AD <sup>Me</sup> HZn <sub>2</sub> Et <sub>2</sub> ][BF <sub>4</sub> ] ( <b>6</b> -NTf <sub>2</sub> )  | ethyl alcohol  | 0 %  | 0 %  | 2 %  | --        | --    | --   | -- |
| 8  | [AD <sup>Me</sup> HZn <sub>2</sub> Et <sub>2</sub> ][PF <sub>6</sub> ] ( <b>6</b> -PF <sub>6</sub> )   | ethyl alcohol  | 0 %  | 0 %  | 0 %  | --        | --    | --   | -- |
| 9  | [AD <sup>Me</sup> HZn <sub>2</sub> Et <sub>2</sub> ][OTf] ( <b>6</b> -OTf)                             | ethyl alcohol  | 0 %  | 0 %  | 3 %  | --        | --    | --   | -- |
| 10 | [AD <sup>Me</sup> HZn <sub>2</sub> Et <sub>2</sub> ][NTf <sub>2</sub> ] ( <b>6</b> -NTf <sub>2</sub> ) | none           | 0 %  | 0 %  | 2 %  | --        | --    | --   | -- |
| 11 | [PD <sup>Me</sup> Zn <sub>2</sub> Et <sub>2</sub> ][NTf <sub>2</sub> ] ( <b>11</b> )                   | ethyl alcohol  | 0%   | 1%   | 3%   | --        | --    | --   | -- |
| 12 | [PD <sup>H</sup> Zn <sub>2</sub> Et <sub>2</sub> ][NTf <sub>2</sub> ] ( <b>12</b> )                    | benzyl alcohol | 0%   | 3%   | 98%  | 1120<br>0 | 14100 | 1.12 | 78 |

Conditions from Section S7.1. <sup>a</sup>Conversions obtained by <sup>1</sup>H-NMR assay via integration of the methine resonances of monomer lactide and PLA. <sup>b</sup>Number-average molecular weight ( $M_n$ ), polydispersity index ( $M_w/M_n$ ), and degree of polymerization determined by gel permeation chromatography with styrene standards using the correction factor of 0.58.<sup>10</sup>

### S7.3. Stereochemical evaluation of lactide-derived polymers.

$P_r$  and  $P_m$  are the probabilities of forming either an *r* or *m* linkage upon monomer addition, respectively, and are calculated based on homodecoupled <sup>1</sup>H-NMR from:  $[mmm]=P_m^2 + P_mP_r/2$ ,  $[mmr]=[rmm]=P_mP_r/2$ ,  $[rmr]=P_r^2/2$ , and  $[mrm]=[P_r^2 + P_mP_r]/2$ , and  $P_r = 1 - P_m$ .<sup>11</sup>

**Table S10.** Stereochemistry of lactide-derived polymers.

| Entry | Catalyst                                                                                  | Monomer             | Table entry       | Tacticity    |
|-------|-------------------------------------------------------------------------------------------|---------------------|-------------------|--------------|
| 1     | ZnEt <sub>2</sub> /EtOH                                                                   | <i>rac</i> -lactide | Table S9, entry 3 | $P_r = 0.62$ |
| 2     | AD <sup>Me</sup> HZnEt ( <b>12</b> )/ EtOH                                                | <i>rac</i> -lactide | Table S9, entry 4 | $P_r = 0.63$ |
| 3     | [AD <sup>Me</sup> HZn <sub>2</sub> Et <sub>2</sub> ][NTf <sub>2</sub> ] ( <b>6</b> )/EtOH | <i>rac</i> -lactide | Table S9, entry 6 | $P_r = 0.49$ |

<sup>10</sup> Baran, J.; Duda, A.; Kowalski, A.; Szymanski, R.; Penczek, S. Intermolecular Chain Transfer To Polymer With Chain Scission: General Treatment And Determination Of  $K(P)/K(Tr)$  In L,LLactide Polymerization. *Macromol. Rapid Commun.* **1997**, *18*, 325–333.

<sup>11</sup> Chamberlain, B. M.; Cheng, M.; Moore, D. R.; Ovitt, T. M.; Lobkovsky, E. B.; Coates, G. W. Polymerization of Lactide with Zinc and Magnesium  $\beta$ -Diiminate Complexes: Stereocontrol and Mechanism. *J. Am. Chem. Soc.* **2001**, *123*, 3229–3238.

**S8. Spectral data for polymers.**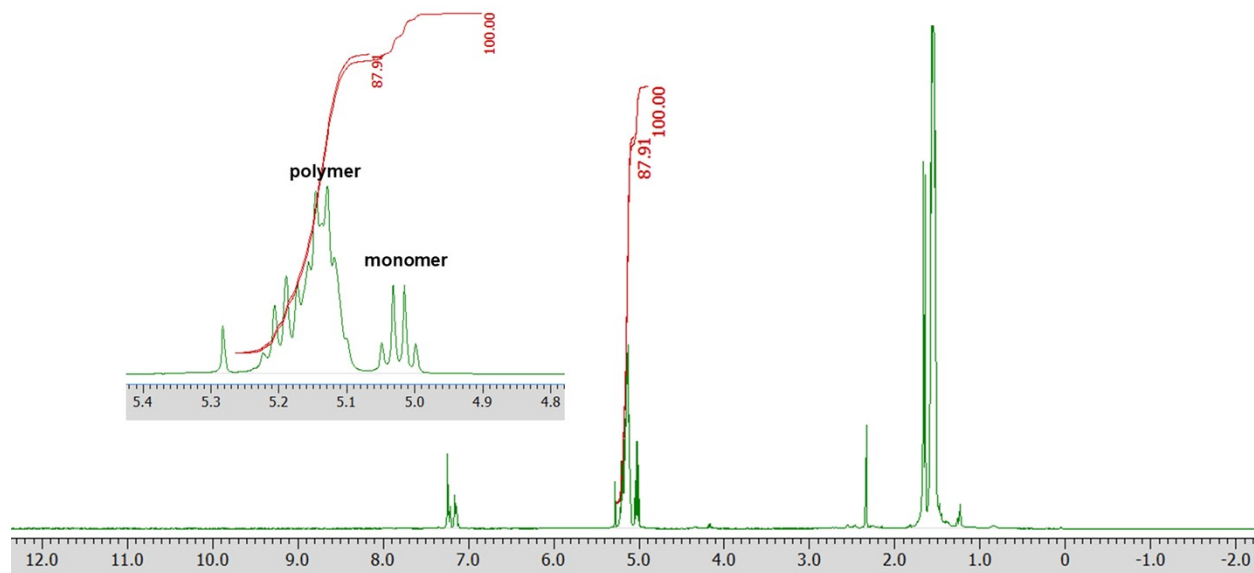

**Figure S46.** Sample  $^1\text{H-NMR}$  used for assay yield (Table S9, entry 6).

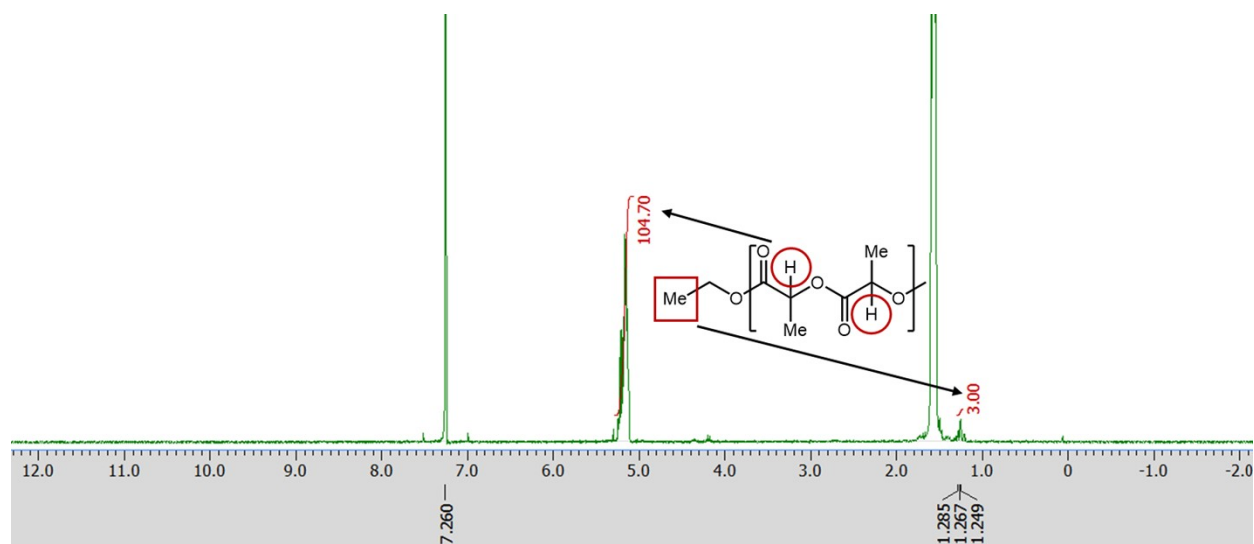

**Figure S47.**  $^1\text{H-NMR}$  of isolated poly(*rac*-lactic acid) obtained from  $[\text{AD}^{\text{Me}}\text{HZn}_2\text{Et}_2][\text{NTf}_2]$  (**6-NTf<sub>2</sub>**) and EtOH (Table S9, entry 6).

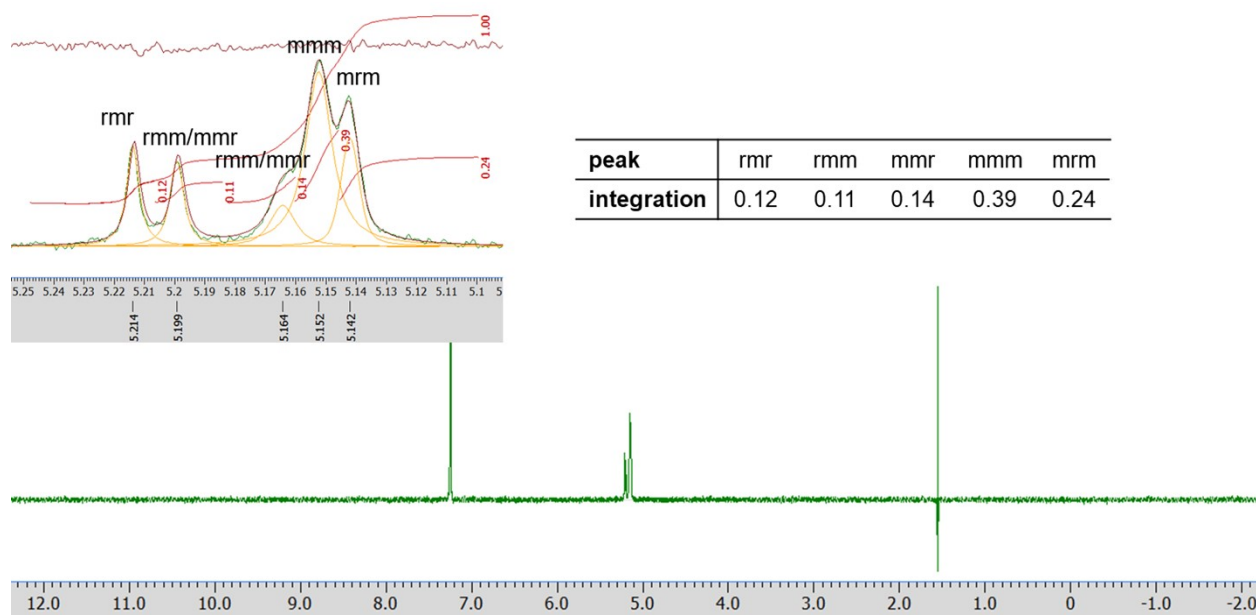

**Figure S48.** Homonuclear decoupled  $^1\text{H}$ -NMR of isolated poly(*rac*-lactic acid) obtained from  $[\text{AD}^{\text{Me}}\text{HZn}_2\text{Et}_2][\text{NTf}_2]$  (**6-NTf<sub>2</sub>**) and EtOH (Table S9, entry 6).  $P_r$  and  $P_m$  are the probabilities of forming either an *r* or *m* linkage upon monomer addition, respectively, and are calculated based on  $^1\text{H}$ -NMR from:  $[\text{mmm}] = P_m^2 + P_m P_r / 2$ ,  $[\text{mmr}] = [\text{rmm}] = P_m P_r / 2$ ,  $[\text{rmr}] = P_r^2 / 2$ , and  $[\text{mrmm}] = [P_r^2 + P_m P_r] / 2$ , and  $P_r = 1 - P_m$ .<sup>12</sup> For the isolated poly(*rac*-lactic acid) obtained from  $[\text{AD}^{\text{Me}}\text{HZn}_2\text{Et}_2][\text{NTf}_2]$  (**6-NTf<sub>2</sub>**) and EtOH (Table S9, entry 6),  $P_r$  was calculated using the integration of  $[\text{rmr}]$ , which  $P_r = (2 * [\text{rmr}])^{0.5} = (2 * 0.12)^{0.5} = 0.49$ .

<sup>12</sup> Chamberlain, B. M.; Cheng, M.; Moore, D. R.; Ovitt, T. M.; Lobkovsky, E. B.; Coates, G. W. Polymerization of Lactide with Zinc and Magnesium  $\beta$ -Diiminato Complexes: Stereocontrol and Mechanism. *J. Am. Chem. Soc.* **2001**, *123*, 3229–3238.

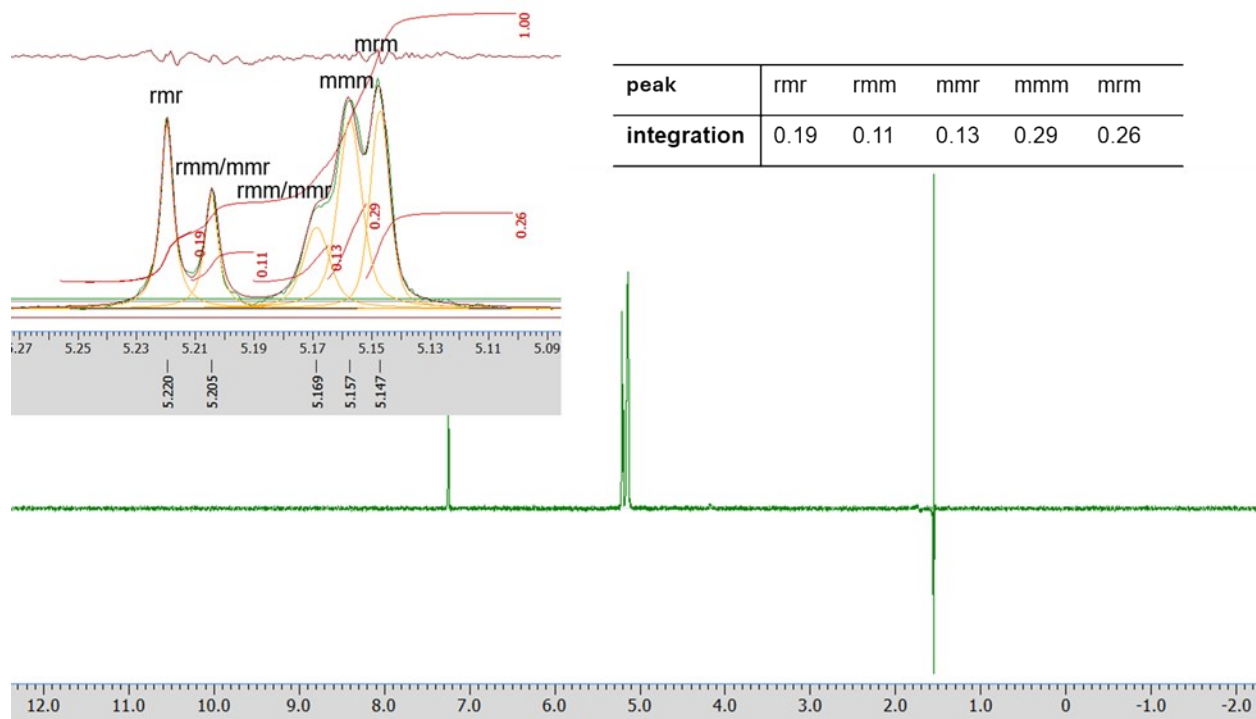

**Figure S49.** Homonuclear decoupled  $^1\text{H}$ -NMR of isolated poly(*rac*-lactic acid) obtained from  $\text{ZnEt}_2$  and EtOH (Table S9, entry 3).  $P_r$  and  $P_m$  are the probabilities of forming either an *r* or *m* linkage upon monomer addition, respectively, and are calculated based on  $^1\text{H}$ -NMR from:  $[mmm]=P_m^2 + P_mP_r/2$ ,  $[mmr]=[rmm]=P_mP_r/2$ ,  $[rmr]=P_r^2/2$ , and  $[mrm]=[P_r^2 + P_mP_r]/2$ , and  $P_r = 1 - P_m$ .<sup>12</sup> For the isolated poly(*rac*-lactic acid) obtained from  $\text{ZnEt}_2$  and EtOH (Table S9, entry 3),  $P_r$  was calculated using the integration of  $[rmr]$ , which  $P_r = (2*[rmr])^{0.5} = (2*0.19)^{0.5} = 0.62$ .

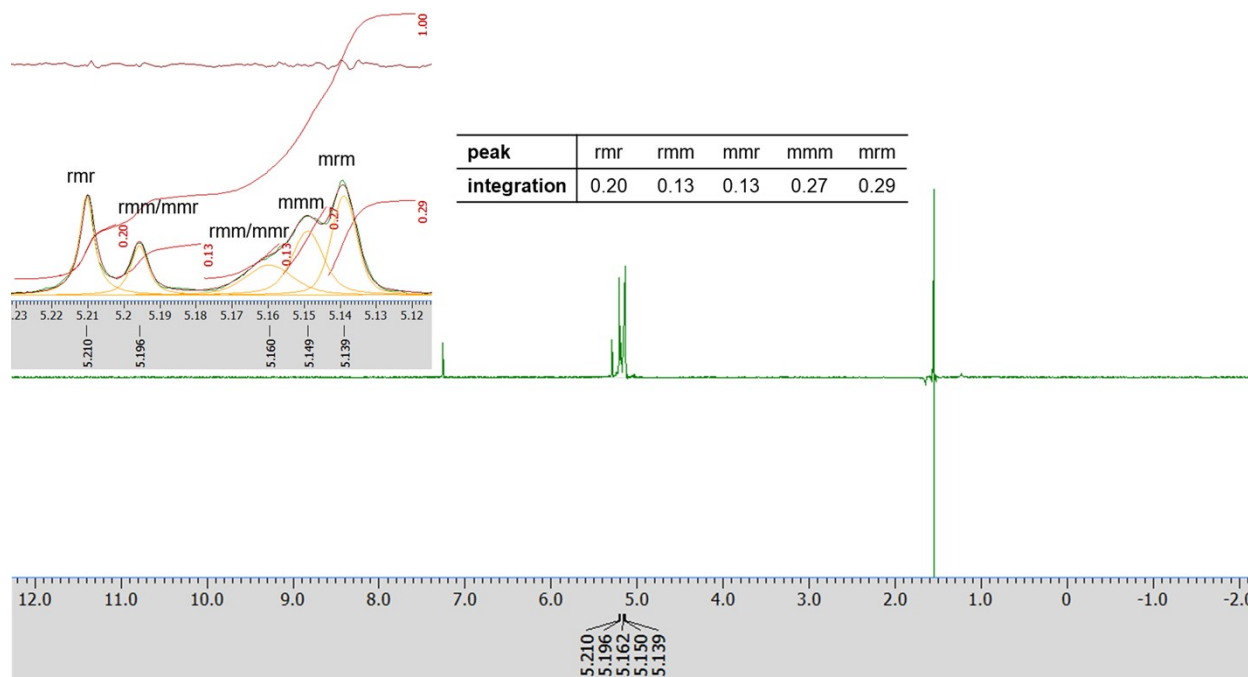

**Figure S50.** Homonuclear decoupled  $^1\text{H}$ -NMR of isolated poly(*rac*-lactic acid) obtained from  $\text{AD}^{\text{Me}}\text{HZnEt}$  (**7**) and EtOH (Table S9, entry 4).  $P_r$  and  $P_m$  are the probabilities of forming either an *r* or *m* linkage upon monomer addition, respectively, and are calculated based on  $^1\text{H}$ -NMR from:  $[\text{mmm}] = P_m^2 + P_m P_r / 2$ ,  $[\text{mmr}] = [\text{rmm}] = P_m P_r / 2$ ,  $[\text{rmr}] = P_r^2 / 2$ , and  $[\text{mrm}] = [P_r^2 + P_m P_r] / 2$ , and  $P_r = 1 - P_m$ .<sup>12</sup> For the isolated poly(*rac*-lactic acid) obtained from  $\text{AD}^{\text{Me}}\text{HZnEt}$  (**7**) and EtOH (Table S9, entry 4),  $P_r$  was calculated using the integration of  $[\text{rmr}]$ , which  $P_r = (2 * [\text{rmr}])^{0.5} = (2 * 0.20)^{0.5} = 0.63$ .

### S8.1. MALDI analysis.

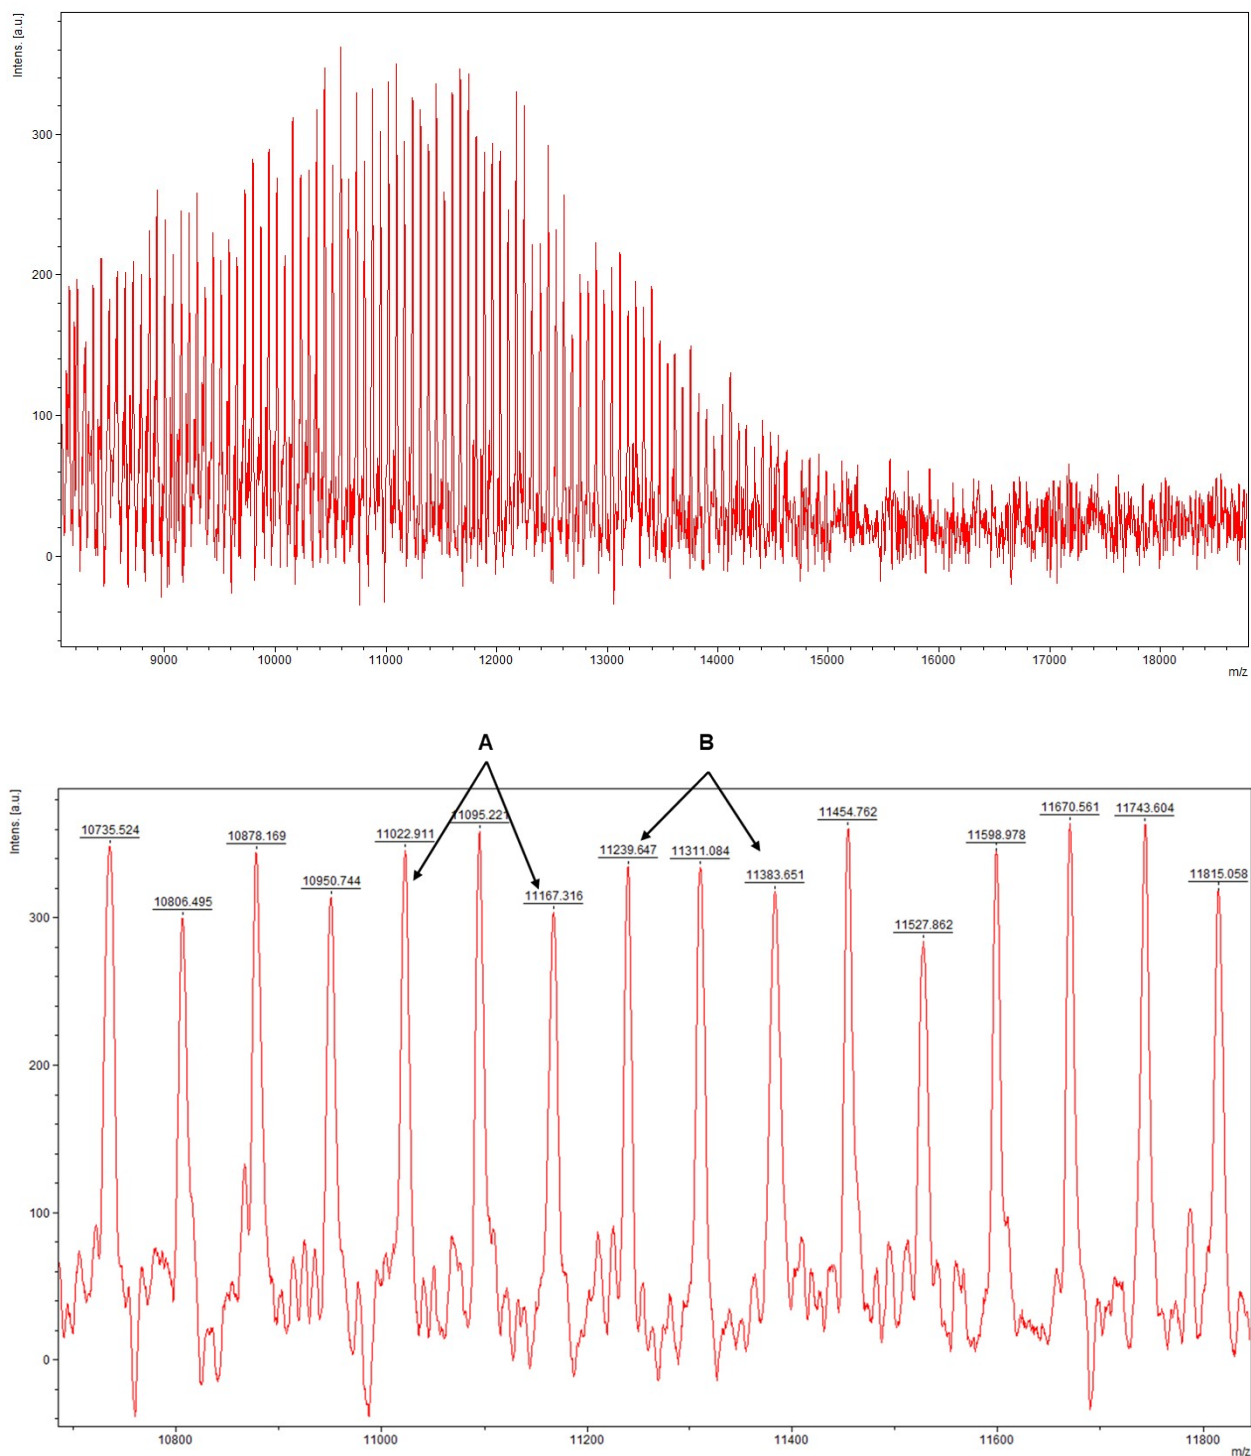

**Figure S51.** MALDI-TOF spectrum isolated poly(*rac*-lactic acid) obtained from [AD<sup>Me</sup>HZn<sub>2</sub>Et<sub>2</sub>][NTf<sub>2</sub>] (**6**-NTf<sub>2</sub>) and EtOH (Table S9, entry 6).

A. Calculated mass ( $n = 76$  or  $77$ ,  $n$  is the number of lactide units)



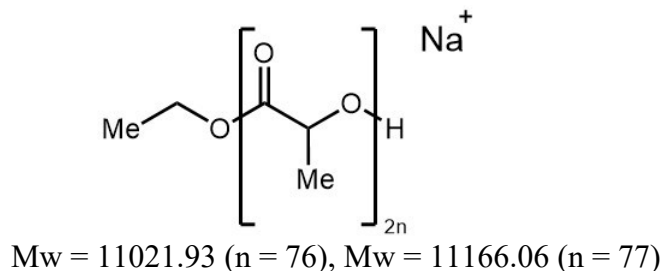

B. Calculated mass (n= 77 or 78, n is the number of lactide units)

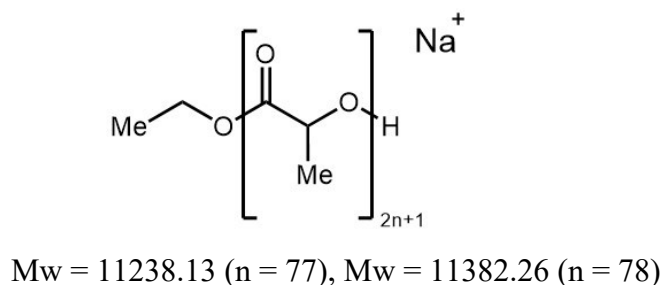

**MALDI analysis:** Only one type of polymer chains with ethoxy group chain end were identified by MALDI analysis. The masses of polymers were calculated based on  $n \cdot 144.13 + 22.99 + 45.06$  and  $(n + \frac{1}{2}) \cdot 144.13 + 22.99 + 45.06$ , where n is the number of lactide units, 144.13 is the molecular weight of lactide ( $C_6H_8O_4$ ), 22.99 is the exact mass of sodium ion ( $Na^+$ ), and 45.06 is the molecular weight of ethoxy group from ethanol. For n= 77, that gives 11166.06 and 11238.13. The fact that nearly equivalent intensity signals are separated by half the mass of a lactide unit indicates rapid transesterification. Chain transfer by transesterification could be a possible explanation why the measured  $M_n$  is lower than theoretical.

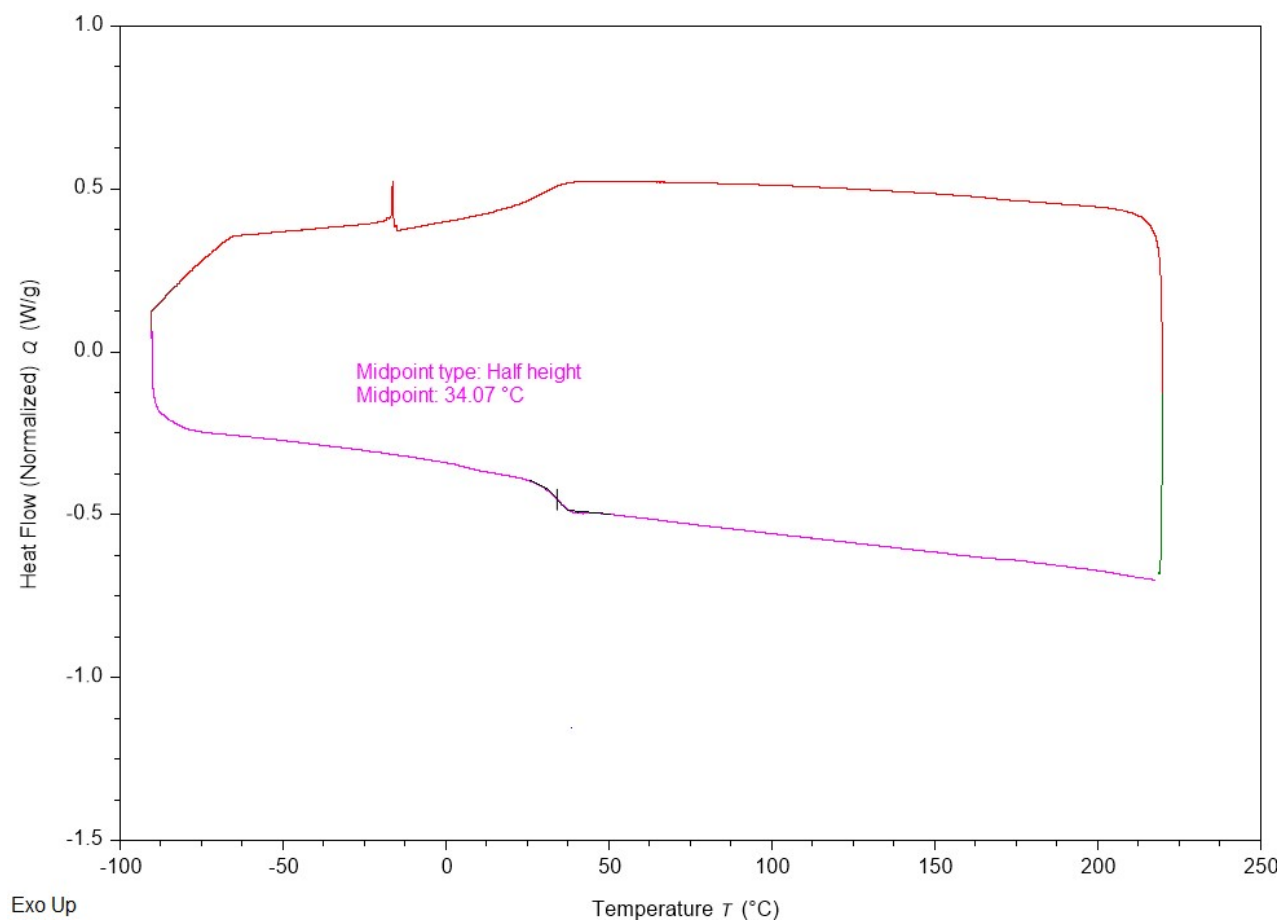

**Figure S52.** DSC of isolated poly(*rac*-lactic acid) obtained from  $[AD^{Me}HZn_2Et_2][NTf_2]$  (**6-NTf<sub>2</sub>**) and EtOH (Table S9, entry 6).

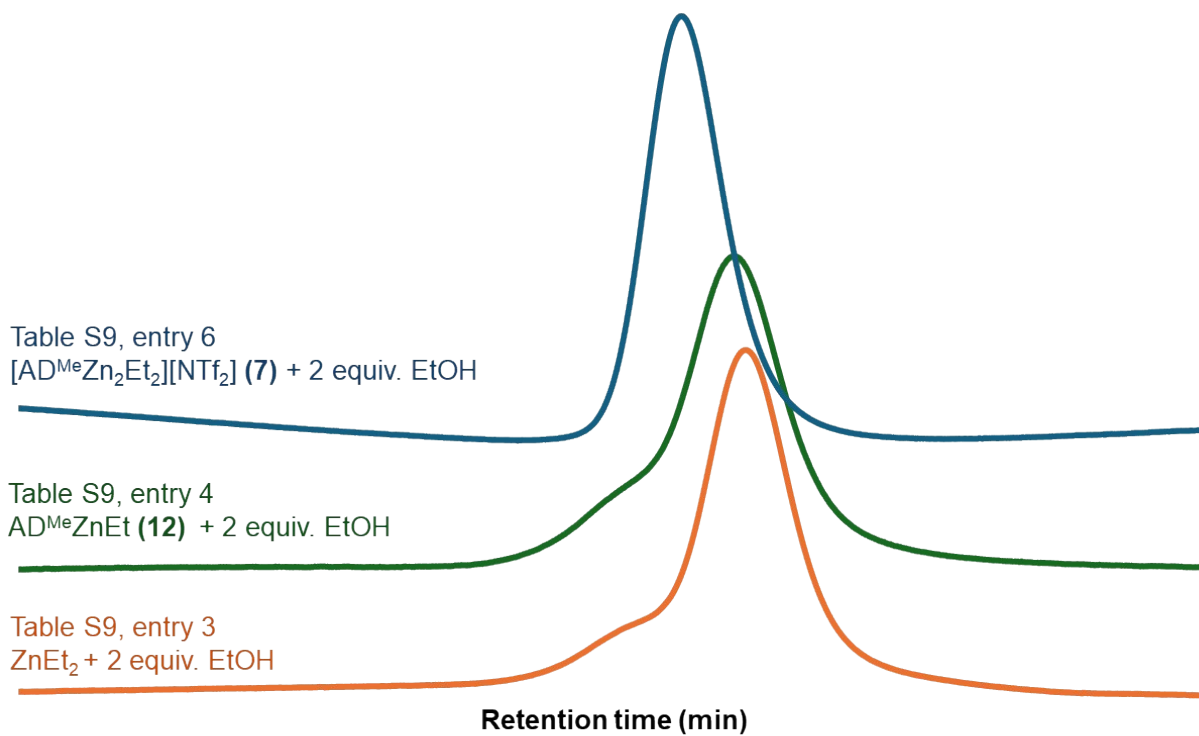

**Figure S53.** GPC analyses from ligand and counterion screen (From Section S7.1).

## **S9. Computational models.**

**S9.1 General.** All computations were performed using the Gaussian 16 Software package on the Sabine Cluster at the University of Houston.

### **S9.2 Energetic analysis for the binding of two zinc atoms in a neutral complex (Scheme S1).**

All calculations were performed in the gas phase, using temperature = 298.15 K, pressure = 1 atm. A multiplicity of 1 and charge of 0 was assigned for all structures in this section. To simplify the calculation, truncated models were generated by removing the methyl and tert-butyl substituents on the ligand and by substituting dimethylzinc for diethylzinc. Geometries for the three alkylzinc complexes (**S9-1** and **S9-2**) and for dimethylzinc were all optimized at the level of B3LYP/6-311G(2d,p). Free energies of formation were then obtained by a single frequency calculation at this same level and are reported below. The geometry optimization and frequency steps were performed together in a single calculation using the Gaussian keyword combination “Opt Freq”. All of the calculations presented here resulted in no negative harmonic frequencies, confirming that the optimized structures were stable local minima on the energy surface. These energies are reported below in hartrees, but were converted to kcal/mol using 1 hartree = 627.50 kcal/mol for discussion in the manuscript.

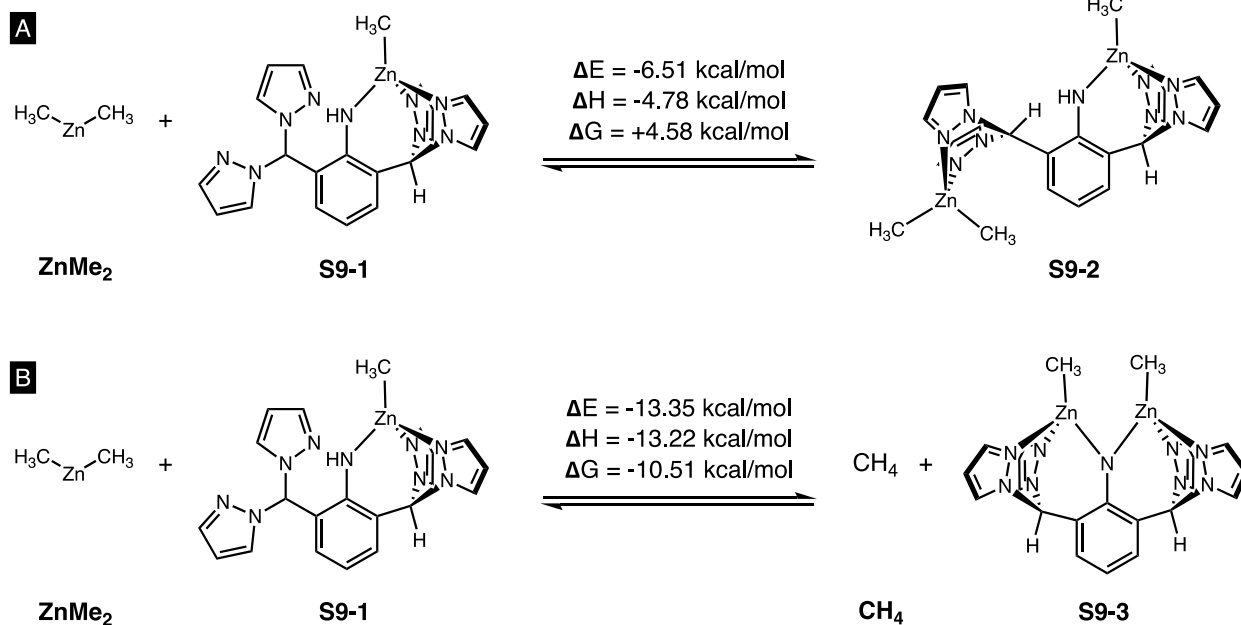

**Scheme S1.** Equilibrium energies for the binding of  $\text{ZnMe}_2$  to  $\text{AD}^{\text{Me}}\text{HZnMe}$  (A) without protonolysis, and (B) with protonolysis to generate  $\text{CH}_4$ .

**ZnMe<sub>2</sub>**

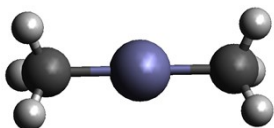

**Figure S54.** Optimized structure of  $\text{ZnMe}_2$ .

XYZ Coordinates for  $\text{ZnMe}_2$

|    |          |          |          |
|----|----------|----------|----------|
| C  | -1.94114 | -0.00010 | 0.00031  |
| Zn | -0.00000 | 0.00007  | -0.00021 |
| H  | -2.33890 | 0.30458  | -0.97062 |
| H  | -2.33852 | 0.68844  | 0.74982  |
| H  | -2.33850 | -0.99344 | 0.22203  |
| C  | 1.94114  | -0.00011 | 0.00032  |
| H  | 2.33887  | 0.30534  | -0.97039 |
| H  | 2.33852  | -0.99360 | 0.22126  |
| H  | 2.33853  | 0.68787  | 0.75034  |

Sum of electronic and thermal Free Energies = -1859.130024 e.u.

Sum of electronic and thermal Enthalpies = -1859.096709 e.u.

E(RB3LYP) = -1859.17342339 e.u.

## S9-1.

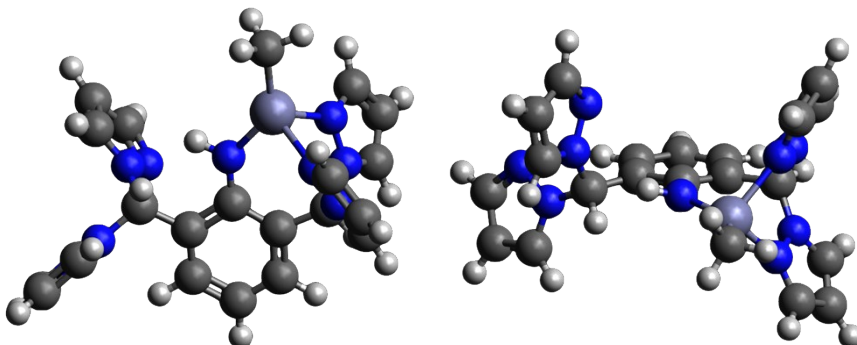**Figure S55.** Optimized geometry for S9-1.

## XYZ Coordinates for S9-1:

|    |          |          |          |
|----|----------|----------|----------|
| C  | -0.22297 | -2.21367 | 1.99428  |
| C  | -0.69872 | -1.25021 | 1.10106  |
| C  | 1.12467  | -2.44768 | 2.18937  |
| C  | 2.03377  | -1.70400 | 1.44343  |
| C  | 1.61004  | -0.74961 | 0.53978  |
| C  | 0.21801  | -0.45152 | 0.34418  |
| H  | -0.94271 | -2.79426 | 2.56535  |
| H  | 1.46386  | -3.19119 | 2.89823  |
| H  | 3.09538  | -1.87068 | 1.56807  |
| C  | 2.60018  | -0.04422 | -0.36199 |
| C  | -2.20595 | -1.13083 | 1.06525  |
| N  | -2.86434 | -1.58886 | -0.16769 |
| Zn | -1.88078 | 1.05366  | -1.29840 |
| N  | -2.78316 | -0.91001 | -1.33052 |
| C  | -3.56058 | -2.73940 | -0.32344 |
| C  | -3.44263 | -1.63912 | -2.22492 |
| C  | -3.95057 | -2.80913 | -1.64242 |
| H  | -4.52170 | -3.59081 | -2.11280 |
| H  | -3.71559 | -3.41619 | 0.50030  |
| H  | -3.52864 | -1.28771 | -3.24076 |
| N  | 2.83928  | 1.34698  | 0.01168  |
| N  | 2.70822  | 1.76961  | 1.28706  |
| C  | 3.07882  | 3.04055  | 1.26063  |
| C  | 3.29881  | 2.33154  | -0.80957 |
| C  | 3.46216  | 3.45200  | -0.03404 |
| H  | 3.05284  | 3.62061  | 2.17045  |
| H  | 3.47590  | 2.15478  | -1.85811 |
| H  | 3.80118  | 4.42328  | -0.35385 |
| N  | -2.77630 | 0.16359  | 1.47566  |
| N  | -2.87119 | 1.22014  | 0.64213  |

|   |          |          |          |
|---|----------|----------|----------|
| C | -3.23149 | 0.47451  | 2.71251  |
| C | -3.64107 | 1.78849  | 2.68054  |
| C | -3.39571 | 2.20487  | 1.36366  |
| H | -3.57313 | 3.16506  | 0.90618  |
| H | -3.22018 | -0.24771 | 3.51191  |
| H | -4.05837 | 2.36069  | 3.49105  |
| H | -2.57538 | -1.82259 | 1.81863  |
| N | 3.87332  | -0.74342 | -0.53891 |
| N | 4.85866  | -0.68014 | 0.37953  |
| C | 4.20070  | -1.54236 | -1.58731 |
| C | 5.82387  | -1.45203 | -0.10691 |
| C | 5.46518  | -2.02492 | -1.34281 |
| H | 6.74388  | -1.56315 | 0.44642  |
| H | 6.04538  | -2.68168 | -1.96899 |
| H | 3.51922  | -1.70451 | -2.40660 |
| H | 2.16217  | -0.01583 | -1.36472 |
| C | -2.45002 | 2.30647  | -2.69522 |
| H | -2.05343 | 2.04271  | -3.68005 |
| H | -2.12057 | 3.32927  | -2.49087 |
| H | -3.53997 | 2.33252  | -2.78516 |
| N | -0.17994 | 0.51082  | -0.51654 |
| H | 0.58237  | 1.12816  | -0.75592 |

Sum of electronic and thermal Free Energies= -3084.899962 e.u.

Sum of electronic and thermal Enthalpies= -3084.810605 e.u.

E(RB3LYP) = -3085.242520 e.u.

### S9-2.

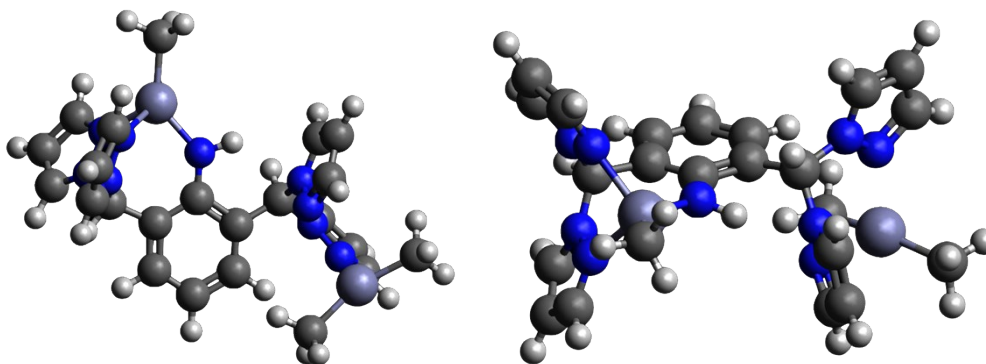

**Figure S56.** Optimized structure for **S9-2**. Note that the heteroscorpionate zinc atom has much shorter Zn–N bonds (pyrazole: 2.155 Å, 2.182 Å; aniline: 1.953 Å) than the dimethylzinc atom (pyrazole: 2.528 Å, 2.743 Å)

### XYZ Coordinates for **S9-2**:

|   |          |          |         |
|---|----------|----------|---------|
| C | -0.91343 | -2.24335 | 1.80730 |
| C | -1.48637 | -1.25392 | 1.00546 |

|    |          |          |          |
|----|----------|----------|----------|
| C  | 0.42167  | -2.58841 | 1.72425  |
| C  | 1.21296  | -1.92541 | 0.79291  |
| C  | 0.69187  | -0.94075 | -0.02507 |
| C  | -0.68881 | -0.54464 | 0.05015  |
| H  | -1.54107 | -2.75447 | 2.53234  |
| H  | 0.84400  | -3.34692 | 2.36891  |
| H  | 2.25854  | -2.18495 | 0.70790  |
| C  | 1.52918  | -0.32433 | -1.12736 |
| C  | -2.95388 | -1.00787 | 1.28088  |
| N  | -3.89270 | -1.44809 | 0.23821  |
| Zn | 4.66365  | 0.31824  | 1.18664  |
| Zn | -2.98339 | 1.06060  | -1.19866 |
| N  | -4.00393 | -0.82129 | -0.95131 |
| C  | -4.69711 | -2.53570 | 0.29190  |
| C  | -4.89423 | -1.51908 | -1.64921 |
| C  | -5.36075 | -2.61676 | -0.91207 |
| H  | -6.07971 | -3.35973 | -1.21126 |
| H  | -4.72972 | -3.16585 | 1.16511  |
| H  | -5.16449 | -1.19752 | -2.64238 |
| N  | 1.88751  | 1.07454  | -0.90431 |
| N  | 2.36322  | 1.50752  | 0.28355  |
| C  | 2.56280  | 2.80821  | 0.11617  |
| C  | 1.80097  | 2.08372  | -1.81351 |
| C  | 2.22449  | 3.22858  | -1.18404 |
| H  | 2.95833  | 3.39470  | 0.93064  |
| H  | 1.44670  | 1.90945  | -2.81680 |
| H  | 2.28066  | 4.22014  | -1.60022 |
| N  | -3.32227 | 0.34233  | 1.73809  |
| N  | -3.52646 | 1.37278  | 0.89107  |
| C  | -3.46649 | 0.73299  | 3.02670  |
| C  | -3.77896 | 2.07364  | 3.01620  |
| C  | -3.80554 | 2.42169  | 1.65761  |
| H  | -4.01260 | 3.37620  | 1.20071  |
| H  | -3.32795 | 0.04146  | 3.84120  |
| H  | -3.96324 | 2.70608  | 3.86738  |
| H  | -3.20503 | -1.64177 | 2.12799  |
| N  | 2.71652  | -1.09710 | -1.49301 |
| N  | 3.85560  | -1.06216 | -0.77039 |
| C  | 2.81113  | -1.95765 | -2.53686 |
| C  | 4.67862  | -1.90965 | -1.37911 |
| C  | 4.07137  | -2.50749 | -2.49649 |
| H  | 5.67721  | -2.04924 | -0.99548 |
| H  | 4.49359  | -3.22310 | -3.18121 |



|   |          |          |          |
|---|----------|----------|----------|
| H | 1.98581  | -2.11161 | -3.21272 |
| H | 0.91545  | -0.31255 | -2.03269 |
| C | -3.71805 | 2.31076  | -2.51821 |
| H | -3.56375 | 1.97175  | -3.54682 |
| H | -3.26286 | 3.30267  | -2.44530 |
| H | -4.79555 | 2.44221  | -2.38317 |
| C | 5.86066  | 1.48819  | 0.15601  |
| H | 6.09863  | 2.41067  | 0.69549  |
| H | 5.41703  | 1.77305  | -0.80102 |
| H | 6.81660  | 0.99940  | -0.06049 |
| C | 4.01200  | -0.72723 | 2.71287  |
| H | 2.93687  | -0.59538 | 2.85047  |
| H | 4.50288  | -0.43505 | 3.64637  |
| H | 4.19830  | -1.79781 | 2.57840  |
| N | -1.19370 | 0.41862  | -0.75164 |
| H | -0.46385 | 0.97981  | -1.16359 |

Sum of electronic and thermal Free Energies = -4944.022683 e.u.

Sum of electronic and thermal Enthalpies = -4943.914927 e.u.

E(RB3LYP) = -4944.426320 e.u.

**Table S10.** Change in energy for the reaction in Scheme S1A, the reaction of ZnMe<sub>2</sub> with **S9-1** to give **S9-2**.

| Units    | Difference<br>in E | Difference<br>in H | Difference<br>in G |
|----------|--------------------|--------------------|--------------------|
| Hartrees | -0.01037661        | -0.007613          | +0.007303          |
| Kcal/mol | -6.51              | -4.78              | +4.58              |

CH<sub>4</sub>.

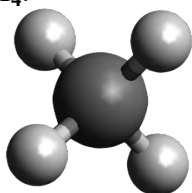

**Figure S57.** Optimized structure for CH<sub>4</sub>.

XYZ Coordinates for CH<sub>4</sub>:

|   |          |          |          |
|---|----------|----------|----------|
| C | 0.00000  | 0.00000  | 0.00000  |
| H | 0.62900  | 0.62900  | 0.62900  |
| H | -0.62900 | -0.62900 | 0.62900  |
| H | -0.62900 | 0.62900  | -0.62900 |
| H | 0.62900  | -0.62900 | -0.62900 |

Sum of electronic and thermal Free Energies = -40.507363 e.u.

Sum of electronic and thermal Enthalpies = -40.486236 e.u.

E(RB3LYP) = -40.534634 e.u.

### S9-3.

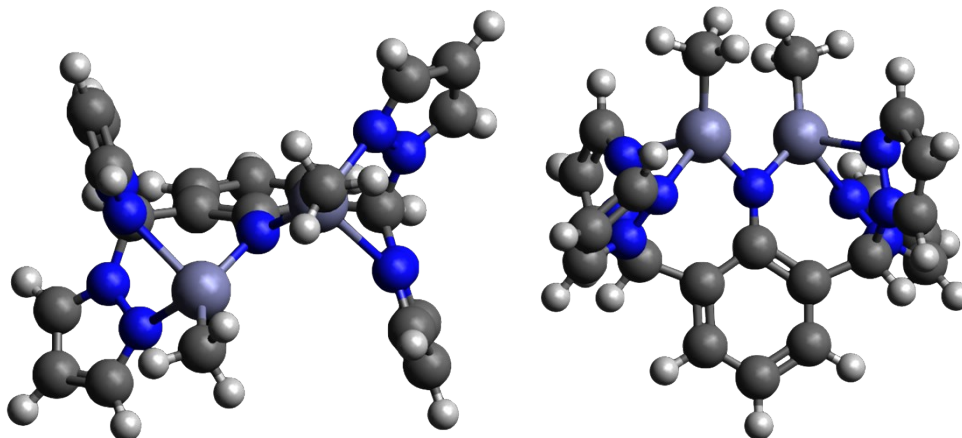

**Figure S58.** Optimized structure for **S9-3**.

#### XYZ Coordinates for **S9-3**:

|    |          |          |          |
|----|----------|----------|----------|
| C  | -1.14514 | 3.34330  | 0.28878  |
| C  | -1.18066 | 1.95450  | 0.28725  |
| C  | -0.00038 | 4.06929  | -0.00273 |
| C  | 1.14457  | 3.34311  | -0.29307 |
| C  | 1.18040  | 1.95432  | -0.28960 |
| C  | -0.00012 | 1.14125  | -0.00084 |
| H  | -2.05466 | 3.88748  | 0.53345  |
| H  | -0.00047 | 5.15072  | -0.00352 |
| H  | 2.05402  | 3.88715  | -0.53833 |
| N  | -0.00014 | -0.18283 | -0.00029 |
| C  | 2.53436  | 1.39038  | -0.66400 |
| C  | -2.53431 | 1.39075  | 0.66305  |
| N  | -2.56364 | 0.34932  | 1.70532  |
| Zn | 1.43996  | -1.35070 | 0.55565  |
| Zn | -1.44034 | -1.35105 | -0.55524 |
| N  | -2.52101 | -0.96539 | 1.41288  |
| C  | -2.61217 | 0.55963  | 3.04107  |
| C  | -2.54749 | -1.59230 | 2.58419  |
| C  | -2.60472 | -0.67697 | 3.64781  |
| H  | -2.64014 | -0.88528 | 4.70349  |
| H  | -2.64277 | 1.55539  | 3.45190  |
| H  | -2.51580 | -2.66980 | 2.61206  |
| N  | 3.36179  | 0.96772  | 0.47058  |

|   |          |          |          |
|---|----------|----------|----------|
| N | 2.94361  | 0.02208  | 1.33329  |
| C | 3.89259  | -0.07140 | 2.25864  |
| C | 4.55778  | 1.47860  | 0.84491  |
| C | 4.93421  | 0.83273  | 2.00238  |
| H | 3.78981  | -0.78881 | 3.05705  |
| H | 5.03874  | 2.25614  | 0.27495  |
| H | 5.83085  | 0.99270  | 2.57621  |
| N | -3.36249 | 0.96692  | -0.47058 |
| N | -2.94486 | 0.02047  | -1.33267 |
| C | -4.55872 | 1.47744  | -0.84464 |
| C | -4.93587 | 0.83051  | -2.00128 |
| C | -3.89442 | -0.07388 | -2.25734 |
| H | -3.79216 | -0.79205 | -3.05513 |
| H | -5.03932 | 2.25551  | -0.27510 |
| H | -5.83287 | 0.98993  | -2.57470 |
| H | -3.09824 | 2.21419  | 1.09672  |
| N | 2.56456  | 0.34800  | -1.70531 |
| N | 2.52158  | -0.96647 | -1.41171 |
| C | 2.61464  | 0.55705  | -3.04119 |
| C | 2.54937  | -1.59447 | -2.58240 |
| C | 2.60790  | -0.68013 | -3.64679 |
| H | 2.51770  | -2.67199 | -2.60931 |
| H | 2.64451  | -0.88943 | -4.70224 |
| H | 2.64569  | 1.55242  | -3.45291 |
| H | 3.09845  | 2.21350  | -1.09808 |
| C | -1.70144 | -3.15000 | -1.29830 |
| H | -1.10694 | -3.90497 | -0.77717 |
| H | -1.42428 | -3.20709 | -2.35585 |
| H | -2.74966 | -3.45530 | -1.22437 |
| C | 1.70153  | -3.14908 | 1.29995  |
| H | 1.41453  | -3.20832 | 2.35473  |
| H | 2.75167  | -3.44996 | 1.23570  |
| H | 1.11519  | -3.90609 | 0.77253  |

Sum of electronic and thermal Free Energies = -4903.539376 e.u.

Sum of electronic and thermal Enthalpies = -4903.442153 e.u.

E(RB3LYP) = -4903.902589 e.u.

**Table S11.** Change in energy for the reaction in Scheme S1B, the reaction of ZnMe<sub>2</sub> with **S9-1** to give CH<sub>4</sub> and **S9-3**.

| Units    | Difference<br>in E | Difference<br>in H | Difference<br>in G |
|----------|--------------------|--------------------|--------------------|
| Hartrees | -0.02127961        | -0.021075          | -0.016753          |
| Kcal/mol | -13.35             | -13.22             | -10.51             |



**S9.3 Conformational interconversion of the cationic dizinc complexes** (Scheme S2). All calculations were performed in the gas phase, using temperature = 298.15 K, pressure = 1 atm. A multiplicity of 0 and charge of +1 was assigned for all structures in this section. To simplify the calculation, truncated models were generated by removing the methyl and tert-butyl substituents on the ligand and by substituting methylzinc units for ethylzinc units. Geometries for the two stable conformations (**S9-4** and **S9-6**) were all optimized at the level of B3LYP/6-31G(d). The geometry optimization and frequency steps were performed together in a single calculation using the Gaussian keyword combination “Opt Freq”. For both **S9-4** and **S9-6**, no negative harmonic frequencies were obtained, confirming that these are stable ground state structures. Then, transition state **S9-5** was obtained by a single quadratic synchronous transit calculation using **S9-4** and **S9-6**, along with a transition state guess, as input structures with the Gaussian keyword combination “Opt=qst3 Freq”. For **S9-5**, only one negative harmonic frequency was observed, consistent with an energy surface saddle point. Free energies of formation were obtained for **S9-4**, **S9-5**, and **S9-6** at this same level and are reported below. More accurate energies were then obtained for these structures at the level of B3LYP/6-311G++(2d,p) by performing single point calculations on the optimized structures. These energies are reported alongside those obtained at B3LYP/6-31G(d). All energies are reported below in hartrees, but were converted to kcal/mol using 1 hartree = 627.50 kcal/mol for discussion in the manuscript. The two conformations **S9-4** and **S9-6** had no difference in free energy ( $\Delta G = 0$  kcal/mol), and the barrier to their interconversion was small ( $\Delta G^\ddagger = 0$  kcal/mol).

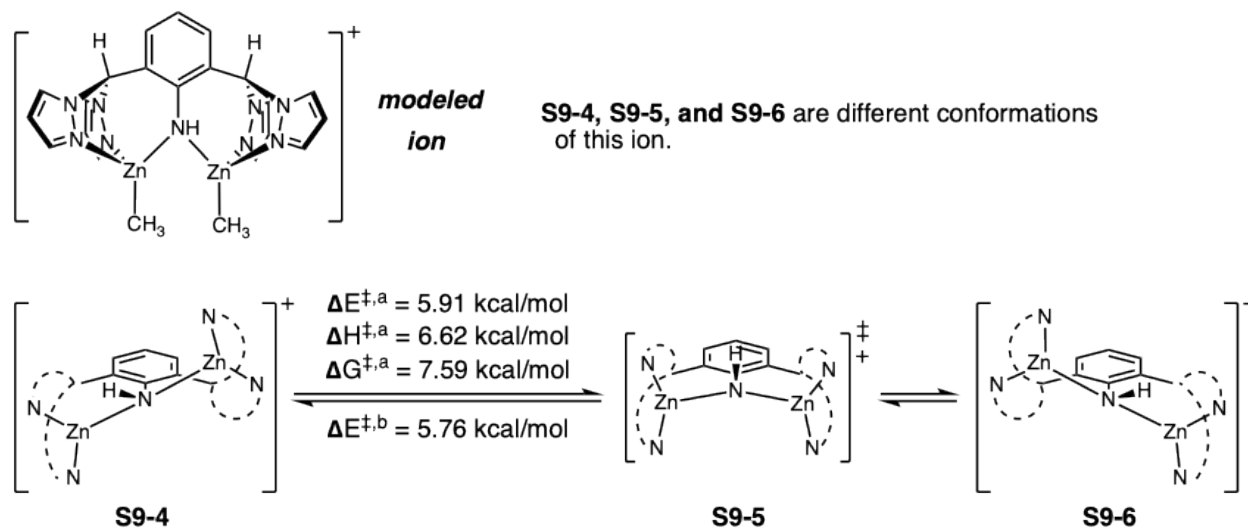

**Scheme S2.** Interconversion of  $C_2$ -symmetric isomers modeled in this section. <sup>a</sup>Energies obtained from a single Opt Freq calculation at the level of B3LYP/6-31G(d). <sup>a</sup>Energy obtained by performing a subsequent single point calculation at the level of B3LYP/6-311++G(2d,p).

### S9-4.

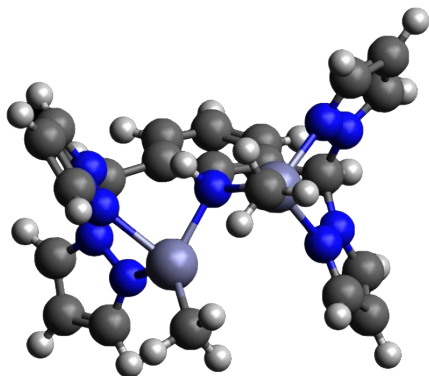

**Figure S59.** Optimized structure for **S9-4**.

#### XYZ Coordinates for **S9-4**:

|   |          |         |          |
|---|----------|---------|----------|
| C | -0.96729 | 3.36221 | -0.15973 |
| C | -1.05727 | 1.97074 | -0.06270 |
| C | 0.16312  | 3.99765 | -0.63678 |
| C | 1.25977  | 3.21889 | -0.96067 |
| C | 1.23002  | 1.83298 | -0.83141 |
| C | 0.04054  | 1.15891 | -0.44081 |
| H | -1.82183 | 3.96646 | 0.12507  |
| H | 0.19697  | 5.07444 | -0.73206 |

|    |          |          |          |
|----|----------|----------|----------|
| H  | 2.17251  | 3.70452  | -1.28963 |
| N  | -0.00884 | -0.24977 | -0.44189 |
| C  | 2.61316  | 1.18368  | -0.95979 |
| C  | -2.42897 | 1.48888  | 0.41566  |
| N  | -2.46066 | 0.58109  | 1.56415  |
| Zn | 1.34438  | -1.19089 | 0.84004  |
| Zn | -1.64951 | -1.49574 | -0.44454 |
| N  | -2.24675 | -0.74966 | 1.44799  |
| C  | -2.75725 | 0.91341  | 2.84535  |
| C  | -2.40372 | -1.25244 | 2.66853  |
| C  | -2.72306 | -0.24336 | 3.58855  |
| H  | -2.91072 | -0.34583 | 4.64333  |
| H  | -2.96662 | 1.93217  | 3.12787  |
| H  | -2.27885 | -2.31095 | 2.83122  |
| N  | 3.24891  | 1.09731  | 0.35102  |
| N  | 2.66134  | 0.39753  | 1.34920  |
| C  | 3.44422  | 0.56154  | 2.41272  |
| C  | 4.37960  | 1.70634  | 0.78004  |
| C  | 4.53745  | 1.38451  | 2.10921  |
| H  | 3.19646  | 0.07264  | 3.34141  |
| H  | 4.97491  | 2.31758  | 0.12171  |
| H  | 5.33171  | 1.69683  | 2.76485  |
| N  | -3.29738 | 1.00191  | -0.65156 |
| N  | -3.03162 | -0.14614 | -1.31431 |
| C  | -4.39265 | 1.61666  | -1.16269 |
| C  | -4.85736 | 0.83372  | -2.19401 |
| C  | -3.97724 | -0.25669 | -2.24272 |
| H  | -3.99002 | -1.11557 | -2.89472 |
| H  | -4.75153 | 2.55144  | -0.76438 |
| H  | -5.71432 | 1.02003  | -2.81782 |
| H  | -2.93511 | 2.37884  | 0.78087  |
| N  | 2.76859  | -0.09940 | -1.65790 |
| N  | 2.58984  | -1.28547 | -1.02088 |
| C  | 3.23766  | -0.28838 | -2.91754 |
| C  | 2.93228  | -2.21886 | -1.90288 |
| C  | 3.34631  | -1.64469 | -3.11557 |
| H  | 2.86401  | -3.26064 | -1.63179 |
| H  | 3.68303  | -2.14838 | -4.00518 |
| H  | 3.45681  | 0.54347  | -3.56725 |
| H  | 3.22723  | 1.87674  | -1.53034 |
| C  | -1.63924 | -3.36965 | -1.00048 |
| H  | -0.86378 | -3.94771 | -0.49309 |
| H  | -1.46645 | -3.47586 | -2.07496 |

|   |          |          |          |
|---|----------|----------|----------|
| H | -2.59342 | -3.85584 | -0.78326 |
| C | 1.16952  | -2.68676 | 2.08133  |
| H | 0.78773  | -2.36637 | 3.05407  |
| H | 2.13780  | -3.16138 | 2.25630  |
| H | 0.49316  | -3.45522 | 1.70262  |
| H | 0.46269  | -0.54006 | -1.29229 |

Sum of electronic and thermal Free Energies= -4904.357907 e.u.<sup>a</sup>

Sum of electronic and thermal Enthalpies= -4903.882544 e.u.<sup>a</sup>

E(RB3LYP) = -4903.978491 e.u.<sup>a</sup>

E(RB3LYP) = -4903.40869171 e.u.<sup>b</sup>

<sup>a</sup>Energies obtained from a single Opt Freq calculation at the level of B3LYP/6-31G(d). <sup>a</sup>Energy obtained by performing a subsequent single point calculation at the level of B3LYP/6-311++G(2d,p).

### S9-5.

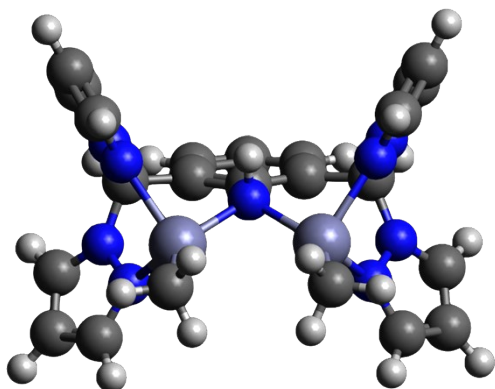

**Figure S60.** Optimized structure for **S9-5**.

#### XYZ Coordinates for **S9-5**:

|    |          |          |          |
|----|----------|----------|----------|
| C  | -1.17911 | 3.35332  | -0.04110 |
| C  | -1.20415 | 1.96329  | -0.18640 |
| C  | -0.00006 | 4.06118  | 0.05117  |
| C  | 1.17898  | 3.35334  | -0.04138 |
| C  | 1.20402  | 1.96330  | -0.18671 |
| C  | -0.00006 | 1.20477  | -0.22686 |
| H  | -2.11547 | 3.89865  | -0.00458 |
| H  | -0.00007 | 5.13671  | 0.16713  |
| H  | 2.11533  | 3.89869  | -0.00505 |
| N  | 0.00001  | -0.22994 | -0.32730 |
| C  | 2.64567  | 1.44546  | -0.28076 |
| C  | -2.64580 | 1.44548  | -0.28001 |
| N  | -3.15704 | 0.91672  | 0.97676  |
| Zn | 1.55210  | -1.48261 | 0.28306  |



|    |          |          |          |
|----|----------|----------|----------|
| Zn | -1.55183 | -1.48305 | 0.28215  |
| N  | -2.60294 | -0.17180 | 1.55292  |
| C  | -4.14715 | 1.42805  | 1.74957  |
| C  | -3.26142 | -0.35368 | 2.69390  |
| C  | -4.24068 | 0.63442  | 2.86949  |
| H  | -4.92291 | 0.74947  | 3.69390  |
| H  | -4.69900 | 2.30467  | 1.45239  |
| H  | -3.01339 | -1.18914 | 3.32891  |
| N  | 3.15731  | 0.91709  | 0.97600  |
| N  | 2.60268  | -0.17065 | 1.55320  |
| C  | 3.26196  | -0.35263 | 2.69372  |
| C  | 4.14844  | 1.42790  | 1.74782  |
| C  | 4.24223  | 0.63467  | 2.86802  |
| H  | 3.01368  | -1.18754 | 3.32936  |
| H  | 4.70074  | 2.30398  | 1.44985  |
| H  | 4.92518  | 0.74955  | 3.69186  |
| N  | -2.98227 | 0.57012  | -1.40090 |
| N  | -2.73464 | -0.75621 | -1.37287 |
| C  | -3.64374 | 0.92015  | -2.53362 |
| C  | -3.81748 | -0.22541 | -3.27427 |
| C  | -3.23725 | -1.24413 | -2.50228 |
| H  | -3.16637 | -2.30056 | -2.70752 |
| H  | -3.93593 | 1.93995  | -2.72415 |
| H  | -4.30342 | -0.31497 | -4.23047 |
| H  | -3.25387 | 2.32719  | -0.46090 |
| N  | 2.98173  | 0.56954  | -1.40138 |
| N  | 2.73498  | -0.75692 | -1.37205 |
| C  | 3.64300  | 0.91882  | -2.53444 |
| C  | 3.23772  | -1.24568 | -2.50105 |
| C  | 3.81738  | -0.22737 | -3.27400 |
| H  | 3.16736  | -2.30233 | -2.70531 |
| H  | 4.30328  | -0.31755 | -4.23016 |
| H  | 3.93452  | 1.93862  | -2.72601 |
| H  | 3.25365  | 2.32709  | -0.46224 |
| C  | -1.73419 | -3.39123 | 0.66022  |
| H  | -1.27946 | -3.68300 | 1.60838  |
| H  | -1.27986 | -4.01677 | -0.10996 |
| H  | -2.79475 | -3.65290 | 0.71214  |
| C  | 1.73159  | -3.39094 | 0.66156  |
| H  | 1.27582  | -3.68192 | 1.60946  |
| H  | 2.79170  | -3.65430 | 0.71420  |
| H  | 1.27675  | -4.01582 | -0.10885 |
| H  | 0.00015  | -0.44229 | -1.32495 |

Sum of electronic and thermal Free Energies= -4904.348486 e.u.<sup>a</sup>

Sum of electronic and thermal Enthalpies= -4903.874199 e.u.<sup>a</sup>

E(RB3LYP) = -4903.966399 e.u.<sup>a</sup>

E(RB3LYP) = -4904.39950925 e.u.<sup>b</sup>

<sup>a</sup>Energies obtained from a single Opt Freq calculation at the level of B3LYP/6-31G(d). <sup>a</sup>Energy obtained by performing a subsequent single point calculation at the level of B3LYP/6-311++G(2d,p).

### S9-6.

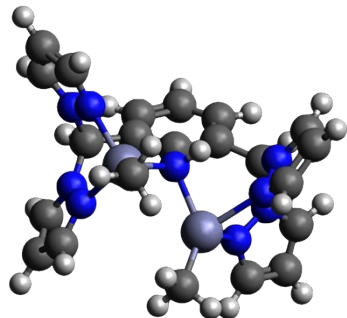

**Figure S61.** Optimized structure for **S9-6**.

#### XYZ Coordinates for **S9-6**:

|    |          |          |          |
|----|----------|----------|----------|
| C  | -1.26000 | 3.21852  | -0.96203 |
| C  | -1.23021 | 1.83267  | -0.83218 |
| C  | -0.16331 | 3.99743  | -0.63870 |
| C  | 0.96720  | 3.36221  | -0.16156 |
| C  | 1.05720  | 1.97079  | -0.06384 |
| C  | -0.04069 | 1.15877  | -0.44142 |
| H  | -2.17282 | 3.70399  | -1.29102 |
| H  | -0.19719 | 5.07418  | -0.73444 |
| H  | 1.82182  | 3.96659  | 0.12275  |
| N  | 0.00868  | -0.24985 | -0.44174 |
| C  | 2.42889  | 1.48915  | 0.41466  |
| C  | -2.61329 | 1.18322  | -0.96017 |
| N  | -3.24891 | 1.09719  | 0.35076  |
| Zn | 1.64923  | -1.49590 | -0.44345 |
| Zn | -1.34476 | -1.19093 | 0.84038  |
| N  | -2.66115 | 0.39778  | 1.34909  |
| C  | -4.37893 | 1.70724  | 0.78005  |
| C  | -3.44333 | 0.56293  | 2.41295  |
| C  | -4.53625 | 1.38634  | 2.10953  |
| H  | -5.33003 | 1.69944  | 2.76537  |
| H  | -4.97432 | 2.31832  | 0.12164  |
| H  | -3.19536 | 0.07446  | 3.34180  |
| N  | 2.46055  | 0.58207  | 1.56377  |

|   |          |          |          |
|---|----------|----------|----------|
| N | 2.24624  | -0.74869 | 1.44857  |
| C | 2.40353  | -1.25070 | 2.66938  |
| C | 2.75760  | 0.91518  | 2.84465  |
| C | 2.72336  | -0.24108 | 3.58864  |
| H | 2.27846  | -2.30908 | 2.83280  |
| H | 2.96728  | 1.93408  | 3.12643  |
| H | 2.91130  | -0.34291 | 4.64343  |
| N | -2.76863 | -0.10012 | -1.65786 |
| N | -2.59006 | -1.28599 | -1.02037 |
| C | -3.23756 | -0.28954 | -2.91749 |
| C | -3.34629 | -1.64590 | -3.11503 |
| C | -2.93246 | -2.21966 | -1.90207 |
| H | -2.86431 | -3.26135 | -1.63061 |
| H | -3.45651 | 0.54209  | -3.56754 |
| H | -3.68292 | -2.14991 | -4.00450 |
| H | -3.22753 | 1.87602  | -1.53086 |
| N | 3.29730  | 1.00147  | -0.65223 |
| N | 3.03193  | -0.14725 | -1.31402 |
| C | 4.39232  | 1.61620  | -1.16395 |
| C | 3.97748  | -0.25817 | -2.24243 |
| C | 4.85725  | 0.83257  | -2.19464 |
| H | 3.99049  | -1.11755 | -2.89376 |
| H | 5.71414  | 1.01864  | -2.81862 |
| H | 4.75093  | 2.55141  | -0.76642 |
| H | 2.93512  | 2.37928  | 0.77933  |
| C | -1.16892 | -2.68710 | 2.08115  |
| H | -0.78739 | -2.36679 | 3.05403  |
| H | -0.49212 | -3.45502 | 1.70219  |
| H | -2.13693 | -3.16231 | 2.25601  |
| C | 1.63966  | -3.37003 | -0.99884 |
| H | 0.86322  | -3.94790 | -0.49274 |
| H | 2.59344  | -3.85608 | -0.77950 |
| H | 1.46904  | -3.47670 | -2.07362 |
| H | -0.46299 | -0.54061 | -1.29191 |

Sum of electronic and thermal Free Energies= -4904.357907 e.u.<sup>a</sup>

Sum of electronic and thermal Enthalpies= -4903.882543 e.u.<sup>a</sup>

E(RB3LYP) = -4903.978491 e.u.<sup>a</sup>

E(RB3LYP) = -4903.40869298 e.u.<sup>b</sup>

<sup>a</sup>Energies obtained from a single Opt Freq calculation at the level of B3LYP/6-31G(d). <sup>a</sup>Energy obtained by performing a subsequent single point calculation at the level of B3LYP/6-311++G(2d,p).
